# Supplementary material
Source: publisher figshare collection journal article supplement (https://acs.figshare.com/ndownloader/files/4309624)
Supplement: Supplementary file 1 [file 4309624]

Chiral Sulfoxides as Metabolites of 2-  
Thioimidazole-based p38 $\alpha$  Mitogen-Activated  
Protein Kinase Inhibitors: Enantioselective  
Synthesis and Biological Evaluation

*Stefanie Bühler<sup>†</sup>, Marcia Goettert<sup>†</sup>, Dieter Schollmeyer<sup>‡</sup>, Wolfgang Albrecht<sup>§</sup>, Stefan A.  
Laufer<sup>\*,†</sup>*

<sup>†</sup>Department of Pharmaceutical/Medicinal Chemistry, Eberhard-Karls-University Tübingen,  
Auf der Morgenstelle 8, 72076 Tübingen, Germany, <sup>‡</sup>University Mainz, Institute of Organic  
Chemistry, Duesbergweg 10-14, 55099 Mainz, Germany, and <sup>§</sup>c-a-i-r biosciences GmbH,  
Paul-Ehrlich-Str. 15, 72076 Tübingen, Germany

stefan.laufer@uni-tuebingen.de

## Contents of Supporting Information

|                                                                                                     |     |
|-----------------------------------------------------------------------------------------------------|-----|
| Title Page                                                                                          | S1  |
| General Information                                                                                 | S3  |
| Synthesis of Tri- and Tetrasubstituted 2-Thioimidazoles                                             | S4  |
| Synthesis of the Racemic Sulfoxides                                                                 | S16 |
| Synthesis of Chiral Schiff Base Ligands                                                             | S35 |
| Asymmetric Oxidation with Ti(O- <i>i</i> Pr) <sub>4</sub> /D-DET or L-DET/CHP                       | S40 |
| Table S1                                                                                            | S41 |
| Chiral HPLC traces of the compounds shown in Table S1                                               | S42 |
| Figure S1 and Figure S2                                                                             | S47 |
| Asymmetric Oxidation with Fe(acac) <sub>3</sub> /H <sub>2</sub> O <sub>2</sub> /chiral Schiff bases | S48 |
| Table S2                                                                                            | S49 |
| Chiral HPLC traces of the compounds shown in Table S2                                               | S50 |
| Asymmetric Oxidation with Ti(O- <i>i</i> Pr) <sub>4</sub> /( <i>S</i> )-BINOL/TBHP                  | S55 |
| Table S3                                                                                            | S56 |
| Chiral HPLC traces of the compounds shown in Table S3                                               | S57 |
| Asymmetric Oxidation with Ti(O- <i>i</i> Pr) <sub>4</sub> /( <i>R</i> )-BINOL/TBHP                  | S62 |
| Table S4                                                                                            | S63 |
| Chiral HPLC traces of the compounds shown in Table S4                                               | S64 |
| Figure S3 and Figure S4                                                                             | S70 |
| Figure S5                                                                                           | S71 |
| X-ray data of compound E <sub>1</sub> of <b>9b</b> (CCDC 779553)                                    | S72 |
| Figure S6                                                                                           | S73 |
| X-ray data of compound E <sub>2</sub> of <b>9b</b> (CCDC 779554)                                    | S74 |

**General Information:** All reagents and solvents were of commercial quality and used without further purification. Melting points were determined on a Büchi Melting Point B-545 apparatus. <sup>1</sup>H- and <sup>13</sup>C-NMR spectra were generally collected on a Bruker Avance 200 at 200 MHz and 50 MHz or on a Bruker Avance 400 at 400 MHz and 100 MHz, respectively. Chemical shifts (δ) are reported in ppm. IR spectra were recorded by ATR technique on a Perkin–Elmer Spectrum One spectrophotometer. High-Resolution mass spectral analyses were performed on a Bruker APEX II spectrometer using electron spray ionisation (ESI) or on a Finnigan Sektorfield-mass spectrometer using electron impact (EI). Optical rotations were measured on a Perkin-Elmer Polarimeter 241 (λ = 589 nm, T = 20 °C, l = 1 dm, c in g/100 mL). TLC analyses were performed on fluorescent silica gel 60 plates from Merck. Spots were visualized under UV illumination at 254 and 365 nm. Flash column chromatography was performed over PharmPrep® 60CC silica gel (25-40 μm). The purity of the final compounds were determined by HPLC on a HPLC Hewlett-Packard HP 1090 Series II liquid chromatograph equipped with a UV diode array detector (DAD) (detection at 230 nm and 254 nm) using a Thermo Betasil C<sub>8</sub> column (150 mm × 4.6 mm, dp = 5 μm) or a ZORBAX Eclipse XDB-C<sub>8</sub> column (150 mm x 4.6 mm, dp = 5 μm), employing a gradient of 0.01 M KH<sub>2</sub>PO<sub>4</sub> (pH = 2.3) and methanol as the solvent system with a flow rate of 1.5 mL/min. All final compounds have a purity of >95%. HPLC separation of the sulfoxide enantiomers was achieved on Daicel CHIRALPAK IA (250 mm x 4.6 mm, dp = 5 μm, CH<sub>2</sub>Cl<sub>2</sub>/MeOH/TEA 98: 2: 0.1) on an HP 1090 instrument using 0.8 mL/min flow rate and UV detection at 254 nm.

The following compounds were prepared according to common literature procedures: **5**<sup>[13; 23]</sup>, **6a**<sup>[13; 24]</sup>, **7a**<sup>[11; 25]</sup>, **8a** and **9a**<sup>[26-28]</sup>, (**S**)-**12a**, (**S**)-**12b**, (**S**)-**12c**, (**S**)-**12d**, (**S**)-**12e**, (**S**)-**12h**, (**S**)-**12l**, (**S**)-**12m** and (**S**)-**12n**<sup>[32-39]</sup>; commercially available L-DET, D-DET, S-BINOL and R-BINOL were used.

## 1. The Synthesis of Tri- and Tetrasubstituted 2-Thioimidazoles

**General Procedure A:** The reaction mixture, composed of the specific amine and the 2-thioimidazol derivative, was heated at  $T = 160\text{ }^{\circ}\text{C}$  in a high pressure reactor from Berghof. The progress was monitored until HPLC analysis indicated complete conversion. After cooling to room temperature, an aqueous saturated solution of  $\text{NaHCO}_3$  was added ( $\text{pH} = 8\text{--}9$ ) and the mixture was extracted with EtOAc, dried over  $\text{Na}_2\text{SO}_4$  and evaporated. The crude product was purified by recrystallization from an appropriate solvent.

### 2-Fluoro-4-(4-(4-fluorophenyl)-2-(isopropylthio)-1H-imidazol-5-yl)pyridine **6b**

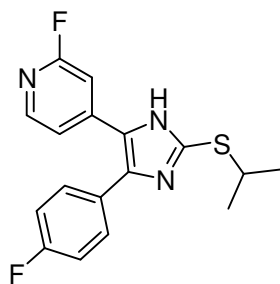

To a suspension of compound **5** (1.0 g, 3.5 mmol) in 30.0 mL methanol was added initially  $\text{K}_2\text{CO}_3$  (0.44 g, 3.15 mmol) and then isopropyl bromide (0.65 g, 5.25 mmol). The resulting mixture was heated at  $T = 65\text{ }^{\circ}\text{C}$  for 18 h. After cooling the reaction to room temperature, the solvent was removed under reduced pressure and the residue was dissolved in EtOAc. The organic phase was washed with  $\text{H}_2\text{O}$ , dried over  $\text{Na}_2\text{SO}_4$ , and concentrated *in vacuo*. The crude product was purified by flash chromatography (silica gel, EtOAc/PE 1:1) to yield 0.75 g (64.7%) of the beige product **6b**.

$\text{C}_{17}\text{H}_{15}\text{F}_2\text{N}_3\text{S}$  ( $M_r = 331.39\text{ g/mol}$ ); **HPLC**:  $t_R = 7.77\text{ min}$ , purity: 99.7% ( $\lambda = 254\text{ nm}$ ),  $t_R = 7.77\text{ min}$ , purity: 100.0% ( $\lambda = 230\text{ nm}$ ); **mp** =  $206.5\text{ }^{\circ}\text{C}$ ;  **$^1\text{H-NMR}$**  (200 MHz, Methanol- $d_4$ ):  $\delta$  [ppm] = 1.27 (d,  $J = 6.8\text{ Hz}$ , 6H,  $\text{CH}(\text{CH}_3)_2$ ), 3.43–3.63 (m, 1H,  $\text{CH}(\text{CH}_3)_2$ ), 7.01 (s, 1H,  $\text{C}^3\text{-H}_{\text{Pyridine}}$ ), 7.06–7.25 (m, 3H,  $\text{C}^3\text{-H}_{4\text{-Fluorophenyl}}$ ,  $\text{C}^5\text{-H}_{4\text{-Fluorophenyl}}$ ,  $\text{C}^5\text{-H}_{\text{Pyridine}}$ ), 7.33–7.46 (m, 2H,  $\text{C}^2\text{-H}_{4\text{-Fluorophenyl}}$ ,  $\text{C}^6\text{-H}_{4\text{-Fluorophenyl}}$ ), 7.97 (d,  $J = 5.4\text{ Hz}$ , 1H,  $\text{C}^6\text{-H}_{\text{Pyridine}}$ );  **$^{13}\text{C-NMR}$**

(50 MHz, Methanol- $d^4$ ):  $\delta$  [ppm] = 22.3 (2C,  $\text{CH}(\text{CH}_3)_2$ ), 39.6 (1C,  $\text{CH}(\text{CH}_3)_2$ ), 105.9 (d, 1C,  $^2J(\text{C},\text{F}) = 38.2$  Hz,  $\text{C}^3_{\text{Pyridine}}$ ), 115.6 (d, 2C,  $^2J(\text{C},\text{F}) = 22.0$  Hz,  $\text{C}^3_{4\text{-Fluorophenyl}}$ ,  $\text{C}^5_{4\text{-Fluorophenyl}}$ ), 118.9 (d, 1C,  $^4J(\text{C},\text{F}) = 3.8$  Hz,  $\text{C}^5_{\text{Pyridine}}$ ), 130.5 (d, 2C,  $^3J(\text{C},\text{F}) = 8.3$  Hz,  $\text{C}^2_{4\text{-Fluorophenyl}}$ ,  $\text{C}^6_{4\text{-Fluorophenyl}}$ ), 146.9 (d, 1C,  $^3J(\text{C},\text{F}) = 14.9$  Hz,  $\text{C}^6_{\text{Pyridine}}$ ), 163.0 (d, 1C,  $^1J(\text{C},\text{F}) = 246.2$  Hz,  $\text{C}^4_{4\text{-Fluorophenyl}}\text{-F}$ , quart.), 164.1 (d, 1C,  $^1J(\text{C},\text{F}) = 235.8$  Hz,  $\text{C}^2_{\text{Pyridine}}\text{-F}$ , quart). The signals for  $\text{C}^1_{4\text{-Fluorophenyl}}$ ,  $\text{C}^4_{\text{Pyridine}}$ ,  $\text{C}^2_{\text{Imidazole}}$ ,  $\text{C}^4_{\text{Imidazole}}$  and  $\text{C}^5_{\text{Imidazole}}$  are not seen in the spectrum; **FT-IR** (ATR,  $\text{cm}^{-1}$ ): 2967, 2926, 1609, 1544, 1498, 1458, 1412, 1398, 1367, 1311, 1289, 1226, 1204, 1156, 1096, 1053, 1001, 976, 881, 838, 815, 743, 735, 713, 696, 684; **HR-MS** (ESI) calculated for  $\text{C}_{17}\text{H}_{15}\text{F}_2\text{N}_3\text{S}$  [ $\text{M}+\text{H}^+$ ]  $m/z = 332.1028$ , measured  $m/z = 332.1029$ .

#### 4-(4-(4-Fluorophenyl)-2-(methylthio)-1H-imidazol-5-yl)pyridin-2-amine **7a**

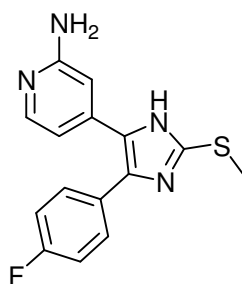

The reaction mixture, composed of compound **6a** (12.13 g, 40.0 mmol),  $\text{NH}_3$  conc. (97.0 mL, 1600 mmol) and copper (I) iodide (1.14 g, 6.0 mmol), was heated at  $T = 180$  °C for 18 h in a high pressure reactor from Berhof. After cooling the mixture to room temperature, water was added and the title compound **7a** precipitated as a beige solid, which was filtered off and washed with water and isopropylether (9.50 g, 79.1%). The spectral data were in agreement with those reported in the literature.<sup>11, 25</sup>

**4-(4-(4-Fluorophenyl)-2-(methylthio)-1*H*-imidazol-5-yl)-*N*-isopropylpyridin-2-amine 8b**

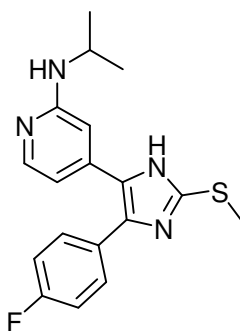

According to the General Procedure A, compound **6a** (20.0 g, 66.0 mmol) and isopropylamine (15.13 g, 251.0 mmol) were heated for 20 h at  $T = 160\text{ }^{\circ}\text{C}$  in the high pressure reactor. After extraction with a solvent mixture of EtOAc/THF, the crude product was purified by recrystallization from EtOAc to yield 16.10 g (71.2%) of the pale yellow product **8b**.

$\text{C}_{18}\text{H}_{19}\text{FN}_4\text{S}$  ( $M_r = 342.44\text{ g/mol}$ ); **HPLC**:  $t_R = 4.50\text{ min}$ , purity: 96.9% ( $\lambda = 254\text{ nm}$ ),  $t_R = 4.50\text{ min}$ , purity: 97.5% ( $\lambda = 230\text{ nm}$ ); **mp** =  $218.2\text{ }^{\circ}\text{C}$ .  **$^1\text{H-NMR}$**  (200 MHz, Methanol- $d^4$ ):  $\delta$  [ppm] = 1.09 (d,  $J = 6.3\text{ Hz}$ , 6H,  $\text{CH}(\text{CH}_3)_2$ ), 2.54 (s, 3H,  $\text{SCH}_3$ ), 3.71-3.90 (m, 1H,  $\text{CH}(\text{CH}_3)_2$ ), 6.39-6.50 (m, 2H,  $\text{C}^3\text{-H}_{\text{Pyridine}}$ ,  $\text{C}^5\text{-H}_{\text{Pyridine}}$ ), 6.99-7.13 (m, 2H,  $\text{C}^3\text{-H}_4\text{-Fluorophenyl}$ ,  $\text{C}^5\text{-H}_4\text{-Fluorophenyl}$ ), 7.31-7.45 (m, 2H,  $\text{C}^2\text{-H}_4\text{-Fluorophenyl}$ ,  $\text{C}^6\text{-H}_4\text{-Fluorophenyl}$ ), 7.74 (d,  $J = 5.9\text{ Hz}$ , 1H,  $\text{C}^6\text{-H}_{\text{Pyridine}}$ );  **$^{13}\text{C-NMR}$**  (50 MHz, Methanol- $d^4$ ):  $\delta$  [ppm] = 15.4 (1C,  $\text{SCH}_3$ ), 21.5 (2C,  $\text{CH}(\text{CH}_3)_2$ ), 42.2 (1C,  $\text{CH}(\text{CH}_3)_2$ ), 105.7 (1C,  $\text{C}^3_{\text{Pyridine}}$ ), 110.0 (1C,  $\text{C}^5_{\text{Pyridine}}$ ), 115.1 (d, 2C,  $^2J(\text{C},\text{F}) = 22.0\text{ Hz}$ ,  $\text{C}^3_{4\text{-Fluorophenyl}}$ ,  $\text{C}^5_{4\text{-Fluorophenyl}}$ ), 130.2 (d, 2C,  $^3J(\text{C},\text{F}) = 8.2\text{ Hz}$ ,  $\text{C}^2_{4\text{-Fluorophenyl}}$ ,  $\text{C}^6_{4\text{-Fluorophenyl}}$ ), 142.9 (1C,  $\text{C}^4_{\text{Pyridine}}$ , quart.), 146.7 (1C,  $\text{C}^6_{\text{Pyridine}}$ ), 158.5 (1C,  $\text{C}^2_{\text{Pyridine}}$ , quart.), 162.5 (d, 1C,  $^1J(\text{C},\text{F}) = 244.9\text{ Hz}$ ,  $\text{C}^4_{4\text{-Fluorophenyl-F}}$ ). The signals for  $\text{C}^1_{4\text{-Fluorophenyl}}$ ,  $\text{C}^2_{\text{Imidazole}}$ ,  $\text{C}^4_{\text{Imidazole}}$  and  $\text{C}^5_{\text{Imidazole}}$  are not seen in the spectrum; **FT-IR** (ATR,  $\text{cm}^{-1}$ ) = 2966, 1605, 1546, 1502, 1429, 1284, 1220, 1176, 1156, 1093, 973, 886, 837, 813, 738, 689; **HR-MS** (ESI) calculated for  $\text{C}_{18}\text{H}_{19}\text{FN}_4\text{S}$  [ $\text{M}+\text{H}^+$ ]  $m/z = 343.1387$ , measured  $m/z = 343.1386$ .

***N*-Cyclohexyl-4-(4-(4-fluorophenyl)-2-(isopropylthio)-1*H*-imidazol-5-yl)pyridin-2-amine**

**8c**

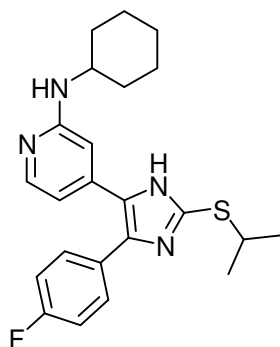

According to the General Procedure A, compound **6b** (5.0 g, 15.1 mmol) and cyclohexylamine (19.97 g, 197 mmol) were heated for 18 h at  $T = 160\text{ }^{\circ}\text{C}$  in the high pressure reactor. After extraction with a solvent mixture of EtOAc/THF and evaporation, the title compound **8c** precipitated as a colorless solid of high analytical quality, which was filtered off and washed with isopropylether (4.10 g, 68.3%).

$\text{C}_{23}\text{H}_{27}\text{FN}_4\text{S}$  ( $M_r = 410.56\text{ g/mol}$ ); **HPLC**:  $t_R = 7.06\text{ min}$ , purity: 99.7% ( $\lambda = 254\text{ nm}$ ),  $t_R = 7.06\text{ min}$ , purity: 99.7% ( $\lambda = 230\text{ nm}$ ); **mp** =  $234.4\text{ }^{\circ}\text{C}$ ;  **$^1\text{H-NMR}$**  (200 MHz,  $\text{DMSO-}d^6$ ):  $\delta$  [ppm] = 0.96-1.24 (m, 5H,  $\text{CH}_2$ , Cyclohexyl); 1.31 (d,  $J = 6.7\text{ Hz}$ , 6H,  $\text{CH}(\text{CH}_3)_2$ ), 1.46-1.74 (m, 3H,  $\text{CH}_2$ , Cyclohexyl), 1.75-1.92 (m, 2H,  $\text{CH}_2$ , Cyclohexyl), 3.38-3.54 (m, 1H,  $\text{CH}$ , Cyclohexyl), 3.60 (sept,  $J = 6.7\text{ Hz}$ , 1H,  $\text{CH}(\text{CH}_3)_2$ ); 6.28 (d,  $J = 7.8\text{ Hz}$ ,  $\text{NH}_{\text{Cyclohexyl}}$ ), 6.40 (d,  $J = 5.6\text{ Hz}$ , 1H,  $\text{C}^5\text{-H}_{\text{Pyridine}}$ ), 6.51 (s, 1H,  $\text{C}^3\text{-H}_{\text{Pyridine}}$ ), 7.21 (t,  $J = 8.8\text{ Hz}$ , 2H,  $\text{C}^3\text{-H}_{4\text{-Fluorophenyl}}$ ,  $\text{C}^5\text{-H}_{4\text{-Fluorophenyl}}$ ), 7.40-7.56 (m, 2H,  $\text{C}^2\text{-H}_{4\text{-Fluorophenyl}}$ ,  $\text{C}^6\text{-H}_{4\text{-Fluorophenyl}}$ ), 7.83 (d,  $J = 5.3\text{ Hz}$ , 1H,  $\text{C}^6\text{-H}_{\text{Pyridine}}$ ), 11.85 (brs, 1H,  $\text{NH}_{\text{Imidazole}}$ );  **$^{13}\text{C-NMR}$**  (50 MHz,  $\text{DMSO-}d^6$ ):  $\delta$  [ppm] = 23.7 (2C,  $\text{CH}(\text{CH}_3)_2$ ), 25.1 (2C,  $\text{CH}_2$ ,  $\text{C}^3_{\text{Cyclohexyl}}$ ,  $\text{C}^5_{\text{Cyclohexyl}}$ ), 25.9 (1C,  $\text{CH}_2$ ,  $\text{C}^4_{\text{Cyclohexyl}}$ ), 33.1 (2C,  $\text{CH}_2$ ,  $\text{C}^2_{\text{Cyclohexyl}}$ ,  $\text{C}^6_{\text{Cyclohexyl}}$ ), 38.9 (1C,  $\text{CH}(\text{CH}_3)_2$ ), 49.3 (1C,  $\text{CH}$ ,  $\text{C}^1_{\text{Cyclohexyl}}$ ), 105.6 (1C,  $\text{C}^3_{\text{Pyridine}}$ ), 109.9 (1C,  $\text{C}^5_{\text{Pyridine}}$ ), 115.8 (d, 2C,  $^2J(\text{C},\text{F}) = 21.5\text{ Hz}$ ,  $\text{C}^3_{4\text{-Fluorophenyl}}$ ,  $\text{C}^5_{4\text{-Fluorophenyl}}$ ), 130.5 (2C,  $\text{C}^2_{4\text{-Fluorophenyl}}$ ,  $\text{C}^6_{4\text{-Fluorophenyl}}$ ), 139.9 (1C,  $\text{C}^4_{\text{Pyridine}}$ , quart.), 148.1 (1C,  $\text{C}^6_{\text{Pyridine}}$ ), 158.9 (1C,  $\text{C}^2_{\text{Pyridine}}$ , quart.), 161.9 (d, 1C,  $^1J(\text{C},\text{F}) = 242.9\text{ Hz}$ ,  $\text{C}^4_{4\text{-Fluorophenyl-F}}$ , quart.); **FT-IR** (ATR,  $\text{cm}^{-1}$

<sup>1</sup>) = 3351, 2932, 2851, 1608, 1547, 1494, 1450, 1384, 1352, 1306, 1262, 1220, 1152, 1091, 1053, 1017, 990, 970, 910, 888, 851, 837, 812, 743, 711, 699, 657; **HR-MS** (ESI) calculated for C<sub>23</sub>H<sub>27</sub>FN<sub>4</sub>S [M+H<sup>+</sup>] m/z = 411.2013, measured m/z = 411.2013.

**4-(4-(4-Fluorophenyl)-2-(methylthio)-1H-imidazol-5-yl)-N-(tetrahydro-2H-pyran-4-yl)pyridin-2-amine 8d**

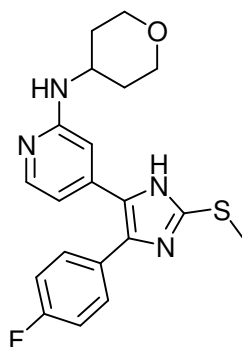

According to the General Procedure A, compound **6a** (19.0 g, 62.6 mmol)) and tetrahydro-2H-pyran-4-amine (19.39 g, 184.0 mmol) were heated for 24 h at T = 160 °C in the high pressure reactor. After extraction with a solvent mixture of EtOAc/MeOH and evaporation, the crude product was purified by recrystallization from EtOH/H<sub>2</sub>O to achieve 16.15 g (68.5%) of the pale yellow product **8d**. The spectral data were in agreement with those reported in the literature.<sup>23</sup>

**4-(4-(4-Fluorophenyl)-2-(isopropylthio)-1H-imidazol-5-yl)-N-isopropylpyridin-2-amine 8e**

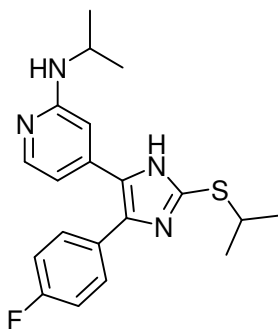



According to the General Procedure A, the title compound **8e** was obtained from compound **6b** (1.50 g, 4.6 mmol) and isopropylamine (6.38 g, 106.0 mmol) after heating for 27 h at T = 160 °C in the high pressure reactor and treatment with isopropylether as a colorless solid (1.30 g, 79.7%).

$C_{20}H_{23}FN_4S$  ( $M_r$  = 370.50 g/mol); **HPLC**:  $t_R$  = 5.82 min, purity: 96.2% ( $\lambda$  = 254 nm),  $t_R$  = 5.82 min, purity: 96.0% ( $\lambda$  = 230 nm); **mp** = 186.8 °C;  **$^1H$ -NMR** (200 MHz,  $DMSO-d^6$ ):  $\delta$  [ppm] = 1.07 (d,  $J$  = 5.3 Hz, 6H,  $SCH(CH_3)_2$ ), 1.31 (d,  $J$  = 6.2 Hz, 6H,  $NHCH(CH_3)_2$ ), 3.48-3.74 (m, 1H,  $SCH(CH_3)_2$ ), 3.77- 4.10 (m, 1H,  $NHCH(CH_3)_2$ ), 6.19- 6.64 (m, 2H,  $C^3$ - $H_{Pyridine}$ ,  $C^5$ - $H_{Pyridine}$ ), 7.02- 7.37 (m, 2H,  $C^3$ - $H_{4-Fluorophenyl}$ ,  $C^5$ - $H_{4-Fluorophenyl}$ ), 7.38- 7.63 (m, 2H,  $C^2$ - $H_{4-Fluorophenyl}$ ,  $C^6$ - $H_{4-Fluorophenyl}$ ); 7.74- 7.94 (m, 1H,  $C^6$ - $H_{Pyridine}$ ); 12.66 (brs, 1H,  $NH_{Imidazole}$ );  **$^{13}C$ -NMR** (50 MHz,  $DMSO-d^6$ ):  $\delta$  [ppm] = 23.0 (2C,  $SCH(CH_3)_2$ ), 23.7 (2C,  $NHCH(CH_3)_2$ ), 38.9 (1C,  $SCH(CH_3)_2$ ), 42.0 (1C,  $NHCH(CH_3)_2$ ), 105.9 (1C,  $C^3_{Pyridine}$ ), 110.0 (1C,  $C^5_{Pyridine}$ ), 115.7 (d, 2C,  $^2J(C,F)$  = 22.2 Hz,  $C^3_{4-Fluorophenyl}$ ,  $C^5_{4-Fluorophenyl}$ ), 130.4 (2C,  $C^2_{4-Fluorophenyl}$ ,  $C^6_{4-Fluorophenyl}$ ), 139.9 (1C,  $C^4_{Pyridine}$ , quart.), 148.0 (1C,  $C^6_{Pyridine}$ ), 159.0 (1C,  $C^2_{Pyridine}$ , quart.), 161.9 (d, 1C,  $^1J(C,F)$  = 243.1 Hz,  $C^4_{4-Fluorophenyl}$ -F, quart.), The signals for  $C^1_{4-Fluorophenyl}$ ,  $C^2_{Imidazole}$ ,  $C^4_{Imidazole}$  and  $C^5_{Imidazole}$  are not seen in the spectrum; **FT-IR** (ATR,  $cm^{-1}$ ) = 3408, 2970, 2934, 2868, 2801, 1602, 1546, 1505, 1430, 1385, 1364, 1325, 1314, 1283, 1243, 1220, 1184, 1155, 1124, 1111, 1089, 1058, 1023, 990, 973, 890, 862, 838, 821, 813, 734, 721, 703, 686; **HR-MS** (ESI) calculated for  $C_{20}H_{23}FN_4S$   $[M+H]^+$   $m/z$  = 371.1700, measured  $m/z$  = 371.1700.

**2-(4-Fluorophenyl)-N-(4-(4-(4-fluorophenyl)-2-(methylthio)-1H-imidazol-5-yl)pyridin-2-yl)acetamide 8f**

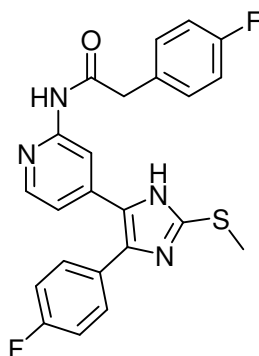

Under an argon atmosphere, *N,N'*-carbonyldiimidazole (2.59 g, 15.7 mmol) was added to a stirred solution of 4-fluorophenylacetic acid (2.31 g, 14.7 mmol) in 12.0 mL dry NMP at room temperature. When gas evolution ceased, compound **7a** (1.50 g, 5.0 mmol) was added and the resulting reaction mixture was stirred at  $T = 120\text{ }^{\circ}\text{C}$  for 2 h. After cooling to room temperature, an aqueous saturated solution of  $\text{NaHCO}_3$  was added ( $\text{pH} = 8\text{--}9$ ) and the mixture was extracted with EtOAc, dried over  $\text{Na}_2\text{SO}_4$  and concentrated *in vacuo*. The title compound **8f** was achieved as a yellow solid (1.56 g, 72.8%) of high analytical quality without further purification.

$\text{C}_{23}\text{H}_{18}\text{F}_2\text{N}_4\text{OS}$  ( $M_r = 436.49\text{ g/mol}$ ); **HPLC**:  $t_R = 7.67\text{ min}$ , purity: 99.6% ( $\lambda = 254\text{ nm}$ ),  $t_R = 7.67\text{ min}$ , purity: 99.6% ( $\lambda = 230\text{ nm}$ ); **mp** =  $197.1\text{ }^{\circ}\text{C}$ ;  **$^1\text{H-NMR}$**  (200 MHz,  $\text{DMSO-}d^6$ ):  $\delta$  [ppm] = 2.59 (s, 3H,  $\text{SCH}_3$ ), 3.67 (s, 2H,  $\text{CH}_2$ ), 6.99 (d,  $J = 5.1\text{ Hz}$ , 1H,  $\text{C}^5\text{-H}_{\text{Pyridine}}$ ), 7.06–7.53 (m, 8H,  $\text{C}^2\text{-H}_{4\text{-Fluorophenyl}}$ ,  $\text{C}^3\text{-H}_{4\text{-Fluorophenyl}}$ ,  $\text{C}^5\text{-H}_{4\text{-Fluorophenyl}}$ ,  $\text{C}^6\text{-H}_{4\text{-Fluorophenyl}}$ ,  $\text{C}^2\text{-H}_{4\text{-Fluorophenylacetamide}}$ ,  $\text{C}^3\text{-H}_{4\text{-Fluorophenylacetamide}}$ ,  $\text{C}^5\text{-H}_{4\text{-Fluorophenylacetamide}}$ ,  $\text{C}^6\text{-H}_{4\text{-Fluorophenylacetamide}}$ ), 8.11 (d,  $J = 5.3\text{ Hz}$ , 1H,  $\text{C}^6\text{-H}_{\text{Pyridine}}$ ), 8.29 (s, 1H,  $\text{C}^3\text{-H}_{\text{Pyridine}}$ ), 10.58 (s, 1H,  $\text{NHCO}$ ), 12.69 (s, 1H,  $\text{NH}_{\text{Imidazole}}$ );  **$^{13}\text{C-NMR}$**  (50 MHz,  $\text{DMSO-}d^6$ ):  $\delta$  [ppm] = 15.4 (1C,  $\text{SCH}_3$ ), 42.4 (1C,  $\text{CH}_2$ ), 110.9 (1C,  $\text{C}^3_{\text{Pyridine}}$ ), 115.3 (d, 2C,  $^2J(\text{C},\text{F}) = 21.0\text{ Hz}$ ,  $\text{C}^3_{4\text{-Fluorophenylacetamide}}$ ,  $\text{C}^5_{4\text{-Fluorophenylacetamide}}$ ), 116.2 (d, 2C,  $^2J(\text{C},\text{F}) = 21.3\text{ Hz}$ ,  $\text{C}^3_{4\text{-Fluorophenyl}}$ ,  $\text{C}^5_{4\text{-Fluorophenyl}}$ ), 116.9 (1C,  $\text{C}^5_{\text{Pyridine}}$ ), 126.9 (1C,  $\text{C}^1_{4\text{-Fluorophenyl}}$ , quart.), 130.5 (1C,  $\text{C}^5_{\text{Imidazole}}$ , quart.), 131.1 (d, 2C,  $^2J(\text{C},\text{F})$

= 8.5 Hz, C<sup>2</sup><sub>4-Fluorophenyl</sub>, C<sup>6</sup><sub>4-Fluorophenyl</sub>), 131.3 (d, 2C, <sup>3</sup>*J*(C,F) = 8.0 Hz, C<sup>2</sup><sub>4-Fluorophenylacetamide</sub>, C<sup>6</sup><sub>4-Fluorophenylacetamide</sub>), 132.4 (d, 1C, <sup>4</sup>*J*(C,F) = 3.0 Hz, C<sup>1</sup><sub>4-Fluorophenylacetamide</sub>, quart.), 134.7 (1C, C<sup>4</sup><sub>Imidazole</sub>, quart), 142.6 (1C, C<sup>2</sup><sub>Imidazole</sub>, quart), 144.2 (1C, C<sup>4</sup><sub>Pyridine</sub>, quart.), 148.0 (1C, C<sup>6</sup><sub>Pyridine</sub>), 152.8 (1C, C<sup>2</sup><sub>Pyridine</sub>, quart.), 161.5 (d, 1C, <sup>1</sup>*J*(C,F) = 240.7 Hz, C<sup>4</sup><sub>4-Fluorophenylacetamide</sub>-F, quart.), 162.3 (d, 1C, <sup>1</sup>*J*(C,F) = 246.0 Hz, C<sup>4</sup><sub>4-Fluorophenyl</sub>-F, quart.), 170.0 (1C, C=O, quart.); **FT-IR** (ATR, cm<sup>-1</sup>) = 3279, 3074, 3044, 2931, 2878, 1694, 1608, 1548, 1500, 1457, 1420, 1366, 1319, 1286, 1256, 1224, 1156, 1133, 1109, 1094, 998, 980, 972, 960, 895, 834, 817, 797, 783, 742, 704, 689, 655; **HR-MS** (ESI) calculated for C<sub>23</sub>H<sub>18</sub>F<sub>2</sub>N<sub>4</sub>OS [M+H<sup>+</sup>] m/z = 437.1242, measured m/z = 437.1246.

**4-(4-(4-Fluorophenyl)-2-(methylthio)-1*H*-imidazol-5-yl)-*N*-((*R*)-1-phenylethyl)pyridin-2-amine **8g****

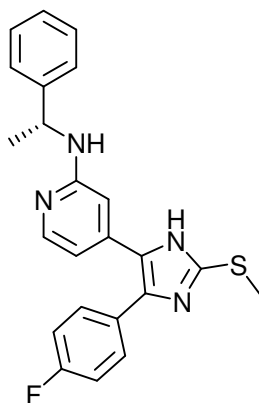

According to the General Procedure A, compound **6a** (0.61 g, 2.0 mmol) and (*R*)-(+)-1-phenylethylamine (0.68 g, 5.47 mmol) were heated for 30 h at T = 160 °C in the high pressure reactor. After extraction with EtOAc and evaporation, the crude product was purified by flash chromatography (silica gel, EtOAc 100%) to achieve 0.45 g (61.6%) of the yellow product **8g**. The spectral data were in agreement with those reported in the literature.<sup>13</sup>

**4-(4-(4-Fluorophenyl)-2-(methylthio)-1*H*-imidazol-5-yl)-*N*-((*S*)-1-phenylethyl)pyridin-2-amine **8h****

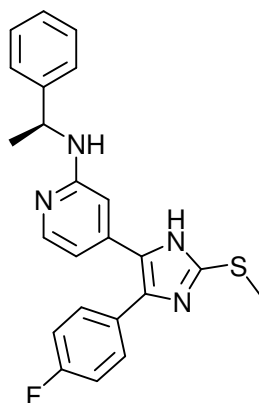

According to the General Procedure A, compound **6a** (13.35 g, 44.0 mmol) and (*S*)-(-)-1-phenylethylamine (36.45 g, 294.80 mmol) were heated for 48 h at  $T = 160\text{ }^{\circ}\text{C}$  in the high pressure reactor. After extraction with EtOAc and evaporation, the crude product was purified by flash chromatography on silica gel (EtOAc/hexane 7:3) to achieve 13.54 g (76.1%) of the pale yellow product **8h**. The spectral data were in agreement with those reported in the literature.<sup>13</sup>

***N*-Cyclohexyl-4-(4-(4-fluorophenyl)-2-(methylthio)-1*H*-imidazol-5-yl)pyridin-2-amine **8i****

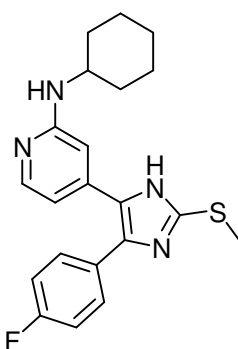

According to the General Procedure A, compound **6a** (1.21 g, 4.0 mmol) and cyclohexylamine (3.97 g, 40.0 mmol) were heated for 24 h at  $T = 160\text{ }^{\circ}\text{C}$  in the high pressure reactor. After extraction with EtOAc and evaporation, the crude product was purified by flash chromatography on silica gel (EtOAc/DCM 1:1) to achieve 0.76 g (49.7%) of the colorless product **8i**. The spectral data were in agreement with those reported in the literature.<sup>10</sup>

**4-(4-(4-Fluorophenyl)-2-(methylthio)-1*H*-imidazol-5-yl)-*N*-((*S*)-3-methylbutan-2-yl)pyridin-2-amine 8j**

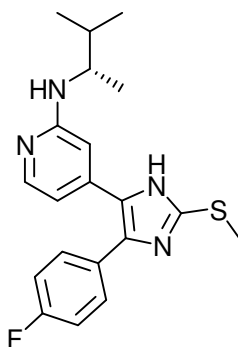

According to the General Procedure A, compound **6a** (2.0 g, 6.60 mmol) and (*S*)-(+)-3-methyl-2-butylamine (2.47 g, 27.7 mmol) were heated for 20 h at  $T = 160\text{ }^{\circ}\text{C}$  in the high pressure reactor. After extraction with EtOAc, the crude product was purified by flash chromatography on silica gel (EtOAc/hexane 2:3) to yield 1.40 g (57.3%) of the pale yellow product **8j**.

$\text{C}_{20}\text{H}_{23}\text{FN}_4\text{S}$  ( $M_r = 370.49\text{ g/mol}$ ); **HPLC**:  $t_R = 5.80\text{ min}$ , purity: 99.0% ( $\lambda = 254\text{ nm}$ ),  $t_R = 5.80\text{ min}$ , purity: 98.9% ( $\lambda = 230\text{ nm}$ ).  $[\alpha]_D^{20} = +24.71$  ( $c = 0.526$  in Methanol); **mp** =  $130.4\text{ }^{\circ}\text{C}$ ;  **$^1\text{H-NMR}$**  (Methanol- $d^4$ , 400 MHz)  $\delta = 0.82\text{--}0.97$  (m, 6H,  $\text{CH}(\text{CH}_3)_2$ ), 1.08 (d,  $J = 6.6\text{ Hz}$ , 3H,  $\text{NHCHCH}_3$ ), 1.65–1.81 (m, 1H,  $\text{CH}(\text{CH}_3)_2$ ), 2.63 (s, 3H,  $\text{S-CH}_3$ ), 3.44–3.57 (m, 1H,  $\text{NHCHCH}_3$ ) 6.46–6.60 (m, 2H,  $\text{C}^5\text{-H}_{\text{Pyridine}}$  and  $\text{C}^3\text{-H}_{\text{Pyridine}}$ ), 7.14 (t,  $J = 8.5\text{ Hz}$ , 2H,  $\text{C}^3\text{-H}_{4\text{-Fluorophenyl}}$ ,  $\text{C}^5\text{-H}_{4\text{-Fluorophenyl}}$ ) 7.40–7.51 (m, 2H,  $\text{C}^2\text{-H}_{4\text{-Fluorophenyl}}$ ,  $\text{C}^6\text{-H}_{4\text{-Fluorophenyl}}$ ), 7.80 (d,  $J = 5.1\text{ Hz}$ , 1H,  $\text{C}^6\text{-H}_{\text{Pyridine}}$ );  **$^{13}\text{C-NMR}$**  (Methanol- $d^4$ , 100 MHz)  $\delta = 16.9$  (1C,  $\text{S-CH}_3$ ), 17.3 (1C,  $\text{CH}(\text{CH}_3)_2$ ), 18.4 (1C,  $\text{NHCHCH}_3$ ), 19.5 (1C,  $\text{CH}(\text{CH}_3)_2$ ), 34.0 (1C,  $\text{CH}(\text{CH}_3)_2$ ), 53.1 (1C,  $\text{NHCHCH}_3$ ), 107.0 (1C,  $\text{C}^3_{\text{Pyridine}}$ ), 111.4 (1C,  $\text{C}^5_{\text{Pyridine}}$ ), 116.6 (d, 2C,  $^2J(\text{C},\text{F}) = 21.8\text{ Hz}$ ,  $\text{C}^3_{4\text{-Fluorophenyl}}$ ,  $\text{C}^5_{4\text{-Fluorophenyl}}$ ), 131.8 (2C,  $^3J(\text{C},\text{F}) = 8.0\text{ Hz}$ ,  $\text{C}^2_{4\text{-Fluorophenyl}}$ ,  $\text{C}^6_{4\text{-Fluorophenyl}}$ ), 144.5 (1C,  $\text{C}^4_{\text{Pyridine}}$ , quart.), 148.0 (1C,  $\text{C}^6_{\text{Pyridine}}$ ), 160.2 (1C,  $\text{C}^2_{\text{Pyridine}}$ , quart.), 164.1 (d, 1C,  $^1J(\text{C},\text{F}) = 245.0\text{ Hz}$ ,  $\text{C}^4_{4\text{-Fluorophenyl-F}}$ , quart.); **FT-IR** (ATR,  $\text{cm}^{-1}$ ); 3056, 2961, 2927, 2871, 1650, 1606, 1576, 1546, 1517, 1503, 1433, 1388, 1369, 1307, 1294, 1221, 1183, 1156, 1094,

1042, 1013, 979, 904, 837, 813, 738, 703, 688, 657; **HR-MS** calculated for  $C_{20}H_{23}FN_4S$   $m/z$  = 370.1622, measured  $m/z$  = 370.1629.

**4-(4-(4-Fluorophenyl)-2-(methylthio)-1*H*-imidazol-5-yl)-*N*-((*R*)-3-methylbutan-2-yl)pyridin-2-amine 8k**

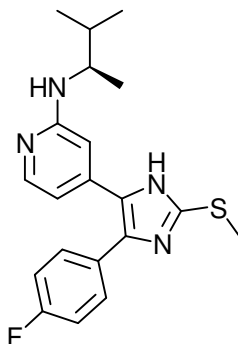

According to the General Procedure A, **6a** (0.76 g, 2.5 mmol) and (*R*)-(-)-3-methyl-2-butylamine (0.67 g, 7.5 mmol) were heated for 24 h at  $T = 160\text{ }^{\circ}\text{C}$  in the high pressure reactor. After extraction with EtOAc, the crude product was purified by flash chromatography on silica gel (EtOAc/hexane 2:3) to yield 0.56 g (60.5%) of the pale yellow product **8k**.

$C_{20}H_{23}FN_4S$  ( $M_r = 370.49\text{ g/mol}$ ); **HPLC**:  $t_R = 5.96\text{ min}$ , purity: 98.8% ( $\lambda = 254\text{ nm}$ ),  $t_R = 5.96\text{ min}$ , purity: 99.5% ( $\lambda = 230\text{ nm}$ );  $[\alpha]_D^{20} = -20.74$  ( $c = 0.266$  in Methanol); **mp** =  $111.2\text{ }^{\circ}\text{C}$ ;  **$^1\text{H-NMR}$**  (Methanol- $d^4$ , 400 MHz)  $\delta = 0.85\text{--}0.97$  (m, 6H,  $\text{CH}(\text{CH}_3)_2$ ), 1.09 (d,  $J = 6.6\text{ Hz}$ , 3H,  $\text{NHCHCH}_3$ ), 1.67–1.80 (m, 1H,  $\text{CH}(\text{CH}_3)_2$ ), 2.63 (s, 3H,  $\text{S-CH}_3$ ), 3.46–3.56 (m, 1H,  $\text{NHCHCH}_3$ ), 6.48–6.63 (m, 2H,  $\text{C}^5\text{-H}_{\text{Pyridine}}$  and  $\text{C}^3\text{-H}_{\text{Pyridine}}$ ), 7.16 (t,  $J = 8.3\text{ Hz}$ , 2H,  $\text{C}^3\text{-H}_{4\text{-Fluorophenyl}}$ ,  $\text{C}^5\text{-H}_{4\text{-Fluorophenyl}}$ ), 7.42–7.52 (m, 2H,  $\text{C}^2\text{-H}_{4\text{-Fluorophenyl}}$ ,  $\text{C}^6\text{-H}_{4\text{-Fluorophenyl}}$ ), 7.80 (d,  $J = 4.6\text{ Hz}$ , 1H,  $\text{C}^6\text{-H}_{\text{Pyridine}}$ );  **$^{13}\text{C-NMR}$**  (Methanol- $d^4$ , 100 MHz)  $\delta = 16.8$  (1C,  $\text{S-CH}_3$ ), 17.3 (1C,  $\text{CH}(\text{CH}_3)_2$ ), 18.4 (1C,  $\text{NHCHCH}_3$ ), 19.5 (1C,  $\text{CH}(\text{CH}_3)_2$ ), 34.0 (1C,  $\text{CH}(\text{CH}_3)_2$ ), 52.2 (1C,  $\text{NHCHCH}_3$ ), 107.1 (1C,  $\text{C}^3_{\text{Pyridine}}$ ), 111.4 (1C,  $\text{C}^5_{\text{Pyridine}}$ ), 116.7 (d, 2C,  $^2J(\text{C},\text{F}) = 21.1\text{ Hz}$ ,  $\text{C}^3_{4\text{-Fluorophenyl}}$ ,  $\text{C}^5_{4\text{-Fluorophenyl}}$ ), 131.8 (2C,  $^3J(\text{C},\text{F}) = 8.0\text{ Hz}$ ,  $\text{C}^2_{4\text{-Fluorophenyl}}$ ,  $\text{C}^6_{4\text{-Fluorophenyl}}$ ), 144.6 (1C,  $\text{C}^4_{\text{Pyridine}}$ , quart.), 148.0 (1C,  $\text{C}^6_{\text{Pyridine}}$ ), 159.9 (1C,  $\text{C}^2_{\text{Pyridine}}$ , quart.),

164.1 (d, 1C,  $^1J(C,F) = 242.1$  Hz, C<sup>4</sup><sub>4-Fluorophenyl</sub>-F, quart.); **FT-IR** (ATR, cm<sup>-1</sup>): 2961, 2928, 2871, 1649, 1606, 1577, 1546, 1518, 1503, 1433, 1389, 1369, 1307, 1221, 1183, 1157, 1094, 1041, 979, 906, 838, 813, 739, 702, 689; **HR-MS** calculated for C<sub>20</sub>H<sub>23</sub>FN<sub>4</sub>S m/z = 370.1622, measured m/z = 370.1620.

***N*-(4-(4-(4-Fluorophenyl)-2-(methylthio)-1*H*-imidazol-5-yl)pyridin-2-yl)acetamide **8l****

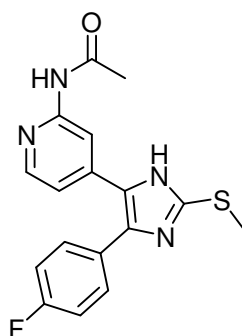

Compound **7a** (0.51 g, 1.70 mmol) was dissolved in 5.0 mL pyridine. The solution was cooled in an ice bath, and acetylchloride (0.47 g, 6.0 mmol) was added dropwise. The resulting mixture was stirred at T = 0- 5 °C. After 1 h, the solution was allowed to warm to room temperature and an aqueous solution of NaHCO<sub>3</sub> was added. The aqueous/organic mixture was extracted with EtOAc, dried over Na<sub>2</sub>SO<sub>4</sub> and the solvents of the combined organic phases were removed under reduced pressure. The crude product was purified by flash chromatography (silica gel, EtOAc/EtOH 9/1) to obtain 0.3 g (52.4%) of the yellow solid **8l**.

C<sub>17</sub>H<sub>15</sub>FN<sub>4</sub>OS (M<sub>r</sub> = 342.39 g/mol); **HPLC**:  $t_R$  = 5.10 min, purity: 98.3% ( $\lambda$  = 254 nm),  $t_R$  = 5.10 min, purity: 98.6% ( $\lambda$  = 230 nm); **mp** = 206.5 °C; **<sup>1</sup>H-NMR** (Methanol-*d*<sup>4</sup>, 400 MHz)  $\delta$  = 2.14 (s, 3H, CO-CH<sub>3</sub>), 2.65 (s, 3H, S-CH<sub>3</sub>), 7.11-7.19 (m, 3H, C<sup>5</sup>-H<sub>Pyridine</sub> and C<sup>3</sup>-H<sub>4-Fluorophenyl</sub>, C<sup>5</sup>-H<sub>4-Fluorophenyl</sub>), 7.40-7.52 (m, 2H, C<sup>2</sup>-H<sub>4-Fluorophenyl</sub>, C<sup>6</sup>-H<sub>4-Fluorophenyl</sub>), 8.05-8.22 (m, 2H, C<sup>6</sup>-H<sub>Pyridine</sub> and C<sup>3</sup>-H<sub>Pyridine</sub>); **<sup>13</sup>C-NMR** (Methanol-*d*<sup>4</sup>, 100 MHz)  $\delta$  = 16.6 (1C, S-CH<sub>3</sub>), 23.9 (1C, CO-CH<sub>3</sub>), 113.2 (1C, C<sup>3</sup><sub>Pyridine</sub>), 116.8 (d, 2C,  $^2J(C,F) = 21.8$  Hz, C<sup>3</sup><sub>4-Fluorophenyl</sub>, C<sup>5</sup><sub>4-Fluorophenyl</sub>), 118.9 (1C, C<sup>5</sup><sub>Pyridine</sub>), 129.0 (1C, C<sup>1</sup><sub>4-Fluorophenyl</sub>, quart.), 131.7 (2C,

$^3J(C,F) = 8.0$  Hz,  $C^2_{4\text{-Fluorophenyl}}$ ,  $C^6_{4\text{-Fluorophenyl}}$ , 145.1 (1C,  $C^4_{\text{Pyridine}}$ , quart.), 148.9 (1C,  $C^6_{\text{Pyridine}}$ ), 153.3 (1C,  $C^2_{\text{Pyridine}}$ , quart.), 164.2 (d, 1C,  $^1J(C,F) = 245.7$  Hz,  $C^4_{4\text{-Fluorophenyl-F}}$ , quart.) 172.0 (1C, C=O, quart); **FT-IR** (ATR,  $\text{cm}^{-1}$ ): 3017, 2927, 2849, 1675, 1643, 1608, 1547, 1503, 1412, 1369, 1315, 1283, 1267, 1221, 1177, 1157, 1094, 1015, 996, 968, 889, 836, 814, 732, 696, 683; **HR-MS** calculated for  $\text{C}_{17}\text{H}_{15}\text{FN}_4\text{OS}$   $m/z = 342.0945$ , measured  $m/z = 342.0978$ .

## 2. The Synthesis of the Racemic Sulfoxides

**General Procedure B:** The respective 2-thioimidazole derivative was dissolved in THF and water was added. The mixture was cooled in an ice bath, and an aqueous solution of potassium peroxomonosulfate (Oxone®) was added dropwise. The resulting mixture was stirred at  $T = 0$  °C. The progress was monitored until HPLC analysis indicated complete conversion. After reaction completion, the solution was allowed to warm to room temperature and an aqueous solution of  $\text{NaHCO}_3$  ( $\text{pH} = 8$ ) was added. The aqueous/organic mixture was extracted with EtOAc, dried over  $\text{Na}_2\text{SO}_4$  and the solvents of the combined organic phases were removed under reduced pressure. The crude product was purified by recrystallization from an appropriate solvent or by flash chromatography.

***N*-(4-(4-(4-Fluorophenyl)-1-methyl-2-(methylsulfinyl)-1*H*-imidazol-5-yl)pyridin-2-yl)acetamide 9a**

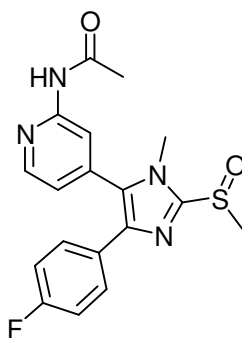



The synthesis and the spectral data for the tetrasubstituted 2-thioimidazole **9a** are known from the literature.<sup>26-28</sup>

enantioselective, analytical HPLC:

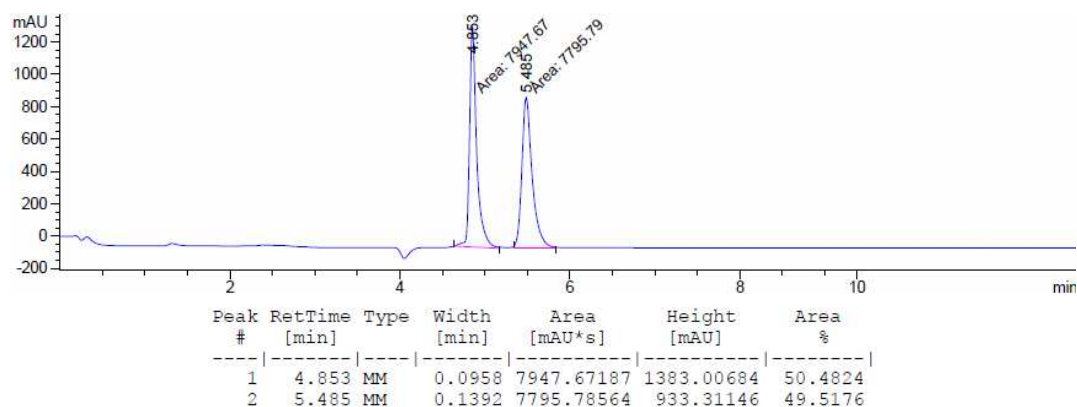

#### 4-(4-(4-Fluorophenyl)-2-(methylsulfinyl)-1*H*-imidazol-5-yl)-*N*-isopropylpyridin-2-amine

**9b**

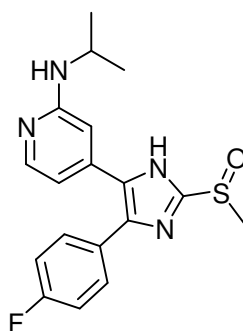

According to the General Procedure B, the title compound **9b** was obtained by the sulfoxidation of compound **8b** (9.31 g, 27.2 mmol), dissolved in 177.0 mL THF, with an aqueous solution of potassium peroxomonosulfate (Oxone®) (8.76 g, 14.3 mmol in 183 mL water) after stirring for 2 h at T = 0 °C and recrystallization from EtOAc as a beige solid (7.97 g, 81.9%).

C<sub>18</sub>H<sub>19</sub>FN<sub>4</sub>OS (M<sub>r</sub> = 358.44 g/mol); **HPLC**: *t<sub>R</sub>* = 3.12 min, purity: 98.2% (λ = 254 nm), *t<sub>R</sub>* = 3.12 min, purity: 98.1% (λ = 230 nm); **mp** = 214.5 °C; **<sup>1</sup>H-NMR** (200 MHz, DMSO-*d*<sup>6</sup>):

$\delta$  [ppm] = 1.10 (d,  $J$  = 6.3 Hz, 6H,  $\text{NHCH}(\text{CH}_3)_2$ ), 3.07 (s, 3H,  $\text{SOCH}_3$ ), 3.74-4.07 (m, 1H,  $\text{CH}(\text{CH}_3)_2$ ), 6.34 (s, 1H,  $\text{NHCH}(\text{CH}_3)_2$ , exchangeable with  $\text{D}_2\text{O}$ ), 6.42 (d,  $J$  = 5.2 Hz, 1H,  $\text{C}^5\text{-H}_{\text{Pyridine}}$ ), 6.58 (s, 1H,  $\text{C}^3\text{-H}_{\text{Pyridine}}$ ), 7.26 (t,  $J$  = 8.6 Hz, 2H,  $\text{C}^3\text{-H}_{4\text{-Fluorophenyl}}$ ,  $\text{C}^5\text{-H}_{4\text{-Fluorophenyl}}$ ), 7.42-7.63 (m, 2H,  $\text{C}^2\text{-H}_{4\text{-Fluorophenyl}}$ ,  $\text{C}^6\text{-H}_{4\text{-Fluorophenyl}}$ ), 7.89 (d,  $J$  = 5.1 Hz, 1H,  $\text{C}^6\text{-H}_{\text{Pyridine}}$ ), 13.73 (s, 1H,  $\text{NH}_{\text{Imidazole}}$ , exchangeable with  $\text{D}_2\text{O}$ );  $^{13}\text{C-NMR}$  (50 MHz,  $\text{DMSO-}d^6$ ):  $\delta$  [ppm] = 23.0 (2C,  $\text{CH}(\text{CH}_3)_2$ ), 39.3 (1C,  $\text{SOCH}_3$ ), 42.0 (1C,  $\text{CH}(\text{CH}_3)_2$ ), 106.3 (1C,  $\text{C}^3_{\text{Pyridine}}$ ), 110.1 (1C,  $\text{C}^5_{\text{Pyridine}}$ ), 115.9 (d, 2C,  $^2J(\text{C},\text{F})$  = 21.6 Hz,  $\text{C}^3_{4\text{-Fluorophenyl}}$ ,  $\text{C}^5_{4\text{-Fluorophenyl}}$ ), 128.2 (1C,  $\text{C}^1_{4\text{-Fluorophenyl}}$ , quart.), 130.8 (d, 2C,  $^3J(\text{C},\text{F})$  = 7.6 Hz,  $\text{C}^2_{4\text{-Fluorophenyl}}$ ,  $\text{C}^6_{4\text{-Fluorophenyl}}$ ), 140.4 (1C,  $\text{C}^2_{\text{Imidazole}}$ , quart.), 148.2 (1C,  $\text{C}^4_{\text{Pyridine}}$ , quart.), 148.5 (1C,  $\text{C}^6_{\text{Pyridine}}$ ), 159.0 (1C,  $\text{C}^2_{\text{Pyridine}}$ , quart.), 162.3 (d, 1C,  $^1J(\text{C},\text{F})$  = 244.0 Hz,  $\text{C}^4_{4\text{-Fluorophenyl-F}}$ , quart.). The signals for  $\text{C}^5_{\text{Imidazole}}$  and  $\text{C}^4_{\text{Imidazole}}$  are not seen in the spectrum; **FT-IR** (ATR,  $\text{cm}^{-1}$ ) = 3299, 2971, 2942, 2871, 1609, 1550, 1499, 1461, 1436, 1420, 1405, 1381, 1332, 1306, 1283, 1221, 1193, 1175, 1159, 1128, 1097, 1049, 1015, 987, 965, 894, 852, 841, 812, 743, 723, 707, 681, 656. **HR-MS** (ESI) calculated for  $\text{C}_{18}\text{H}_{19}\text{FN}_4\text{OS}$  [ $\text{M}+\text{H}^+$ ]  $m/z$  = 359.1336, measured  $m/z$  = 359.1336.

enantioselective, analytical HPLC:

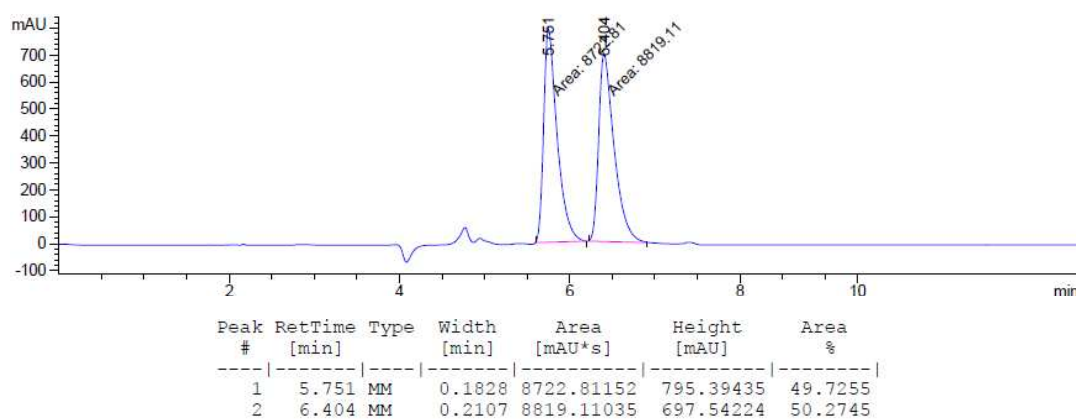

***N*-Cyclohexyl-4-(4-(4-fluorophenyl)-2-(isopropylsulfinyl)-1*H*-imidazol-5-yl)pyridin-2-amine **9c****

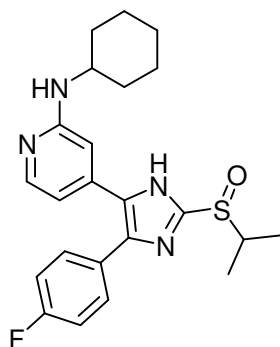

According to the General Procedure B, the title compound **9c** was obtained by the sulfoxidation of compound **8c** (0.31 g, 0.76 mmol), dissolved in 15.0 mL THF and 3.0 mL H<sub>2</sub>O, with an aqueous solution of potassium peroxomonosulfate (Oxone®) (0.25 g, 0.4 mmol in 4.5 mL H<sub>2</sub>O) after stirring for 3.5 h at T = 0 °C as a colorless solid without further purification (0.21 g, 65.8%).

C<sub>23</sub>H<sub>27</sub>FN<sub>4</sub>OS (M<sub>r</sub> = 426.56 g/mol); **HPLC**: *t<sub>R</sub>* = 5.55 min, purity: 98.7% (λ = 254 nm), *t<sub>R</sub>* = 5.55 min, purity: 98.6% (λ = 230 nm); **mp** = 190.3°C; **<sup>1</sup>H-NMR** (200 MHz, DMSO-*d*<sup>6</sup>): δ [ppm] = 0.96-1.24 (m, 7H, CH<sub>2</sub>, Cyclohexyl and SOCH(CH<sub>3</sub>)<sub>2</sub>), 1.19-1.34 (4H, CH<sub>2</sub>, Cyclohexyl and SOCH(CH<sub>3</sub>)<sub>2</sub>), 1.44-1.90 (m, 5H, CH<sub>2</sub>, Cyclohexyl), 3.33-3.62 (m, 2H, CH, Cyclohexyl and SOCH(CH<sub>3</sub>)<sub>2</sub>), 6.29 (brs, 1H, NH<sub>Cyclohexyl</sub>, exchangeable with D<sub>2</sub>O), 6.39 (d, *J* = 5.6 Hz, 1H, C<sup>5</sup>-H<sub>Pyridine</sub>), 6.53 (s, 1H, C<sup>3</sup>-H<sub>Pyridine</sub>), 7.12-7.34 (m, 2H, C<sup>3</sup>-H<sub>4-Fluorophenyl</sub>, C<sup>5</sup>-H<sub>4-Fluorophenyl</sub>), 7.40-7.56 (m, 2H, C<sup>2</sup>-H<sub>4-Fluorophenyl</sub>, C<sup>6</sup>-H<sub>4-Fluorophenyl</sub>), 7.83 (s, 1H, C<sup>6</sup>-H<sub>Pyridine</sub>), 13.66 (s, 1H, NH<sub>Imidazole</sub>, exchangeable with D<sub>2</sub>O); **<sup>13</sup>C-NMR** (50 MHz, DMSO-*d*<sup>6</sup>): δ [ppm] = 15.2 (1C, SOCH(CH<sub>3</sub>)<sub>2</sub>), 15.6 (1C, SOCH(CH<sub>3</sub>)<sub>2</sub>), 25.1 (2C, CH<sub>2</sub>, C<sup>3</sup><sub>Cyclohexyl</sub>, C<sup>5</sup><sub>Cyclohexyl</sub>), 25.8 (1C, CH<sub>2</sub>, C<sup>4</sup><sub>Cyclohexyl</sub>), 33.0 (2C, CH<sub>2</sub>, C<sup>2</sup><sub>Cyclohexyl</sub>, C<sup>6</sup><sub>Cyclohexyl</sub>), 49.3 (1C, SOCH(CH<sub>3</sub>)<sub>2</sub>), 53.2 (1C, CH, C<sup>1</sup><sub>Cyclohexyl</sub>), 106.0 (1C, C<sup>3</sup><sub>Pyridine</sub>), 110.1 (1C, C<sup>5</sup><sub>Pyridine</sub>), 115.9 (d, 2C, <sup>2</sup>*J*(C,F) = 21.6 Hz, C<sup>3</sup><sub>4-Fluorophenyl</sub>, C<sup>5</sup><sub>4-Fluorophenyl</sub>), 130.9 (2C, C<sup>2</sup><sub>4-Fluorophenyl</sub>, C<sup>6</sup><sub>4-Fluorophenyl</sub>), 146.1 (1C, C<sup>4</sup><sub>Pyridine</sub>, quart.), 148.1 (1C, C<sup>6</sup><sub>Pyridine</sub>), 158.7 (1C, C<sup>2</sup><sub>Pyridine</sub>, quart.). The signals for

$C^4$ <sub>4-Fluorophenyl</sub>-F,  $C^1$ <sub>4-Fluorophenyl</sub>,  $C^2$ <sub>Imidazole</sub>,  $C^4$ <sub>Imidazole</sub> and  $C^5$ <sub>Imidazole</sub> are not seen in the spectrum;  
**FT-IR** (ATR,  $\text{cm}^{-1}$ ) = 3298, 2932, 2855, 1608, 1551, 1498, 1455, 1407, 1370, 1344, 1322, 1304, 1292, 1263, 1221, 1187, 1152, 1126, 1087, 1056, 1041, 1029, 987, 978, 964, 931, 911, 887, 841, 807, 744, 722, 709, 689, 655. **HR-MS** (ESI) calculated for  $\text{C}_{23}\text{H}_{27}\text{FN}_4\text{OS}$   $[\text{M}+\text{H}^+]$   $m/z = 427.1962$ , measured  $m/z = 427.1964$ .

enantioselective, analytical HPLC:

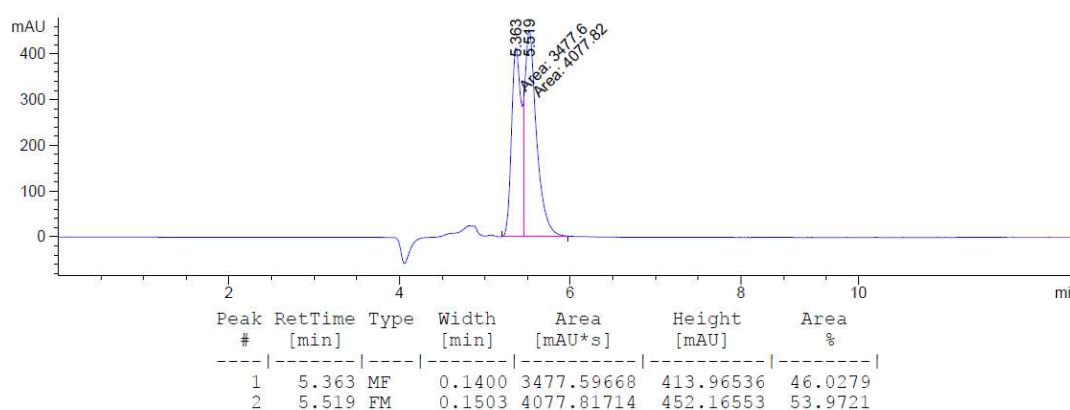

**4-(4-(4-Fluorophenyl)-2-(methylsulfinyl)-1*H*-imidazol-5-yl)-*N*-(tetrahydro-2*H*-pyran-4-yl)pyridin-2-amine **9d****

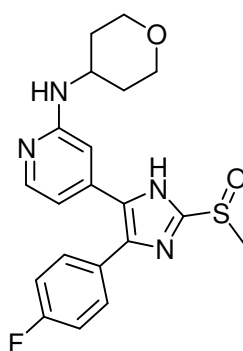

According to the General Procedure B, the title compound **9d** was obtained by the sulfoxidation of compound **8d** (8.0 g, 20.8 mmol), dissolved in 154.0 mL THF and 52.0 mL  $\text{H}_2\text{O}$ , with an aqueous solution of potassium peroxomonosulfate (Oxone®) (7.0 g, 11.4 mmol in 77.0 mL  $\text{H}_2\text{O}$ ) after stirring for 2 h at  $T = 0^\circ\text{C}$  and recrystallization from methanol as a colorless solid (6.86 g, 85.7%).

$C_{20}H_{21}FN_4O_2S$  ( $M_r = 400.48$  g/mol); **HPLC**:  $t_R = 2.67$  min, purity: 99.1% ( $\lambda = 254$  nm),  $t_R = 2.67$  min, purity: 98.8% ( $\lambda = 230$  nm); **mp** = 230.0 °C;  **$^1H$ -NMR** (200 MHz,  $DMSO-d^6$ ):  $\delta$  [ppm] = 1.24-1.53 (m, 2H,  $C^3$ - $H_{Tetrahydropyranyl}$ ,  $C^5$ - $H_{Tetrahydropyranyl}$ ), 1.67-1.90 (m, 2H,  $C^3$ - $H_{Tetrahydropyranyl}$ ,  $C^5$ - $H_{Tetrahydropyranyl}$ ), 3.06 (s, 3H,  $SOCH_3$ ), 3.22-3.44 (m, 2H,  $C^2$ - $H_{Tetrahydropyranyl}$ ,  $C^6$ - $H_{Tetrahydropyranyl}$ ); 3.64-3.94 (m, 3H,  $C^2$ - $H_{Tetrahydropyranyl}$ ,  $C^4$ - $H_{Tetrahydropyranyl}$ ,  $C^6$ - $H_{Tetrahydropyranyl}$ ), 6.47 (d,  $J = 5.1$  Hz, 1H,  $C^5$ - $H_{Pyridine}$ ), 6.50-6.71 (m, 2H,  $C^3$ - $H_{Pyridine}$  and  $NH_{Tetrahydropyranyl}$ , exchangeable with  $D_2O$ ), 7.27 (t,  $J = 8.7$  Hz, 2H,  $C^3$ - $H_{4-Fluorophenyl}$ ,  $C^5$ - $H_{4-Fluorophenyl}$ ), 7.43-7.62 (m, 2H,  $C^2$ - $H_{4-Fluorophenyl}$ ,  $C^6$ - $H_{4-Fluorophenyl}$ ), 7.89 (brs, 1H,  $C^6$ - $H_{Pyridine}$ ), 13.75 (s, 1H,  $NH_{Imidazole}$ , exchangeable with  $D_2O$ );  **$^{13}C$ -NMR** (50 MHz,  $DMSO-d^6$ ):  $\delta$  [ppm] = 33.2 (2C,  $CH_2$ ,  $C^3$   $Tetrahydropyranyl$ ,  $C^5$   $Tetrahydropyranyl$ ), 39.3 (1C,  $SOCH_3$ ), 46.8 (1C,  $CH$ ,  $C^4$   $Tetrahydropyranyl$ ), 66.4 (2C,  $CH_2$ ,  $C^2$   $Tetrahydropyranyl$ ,  $C^6$   $Tetrahydropyranyl$ ), 106.3 (1C,  $C^3$   $Pyridine$ ), 110.4 (1C,  $C^5$   $Pyridine$ ), 116.0 (d, 2C,  $^2J(C,F) = 21.6$  Hz,  $C^3$   $4-Fluorophenyl$ ,  $C^5$   $4-Fluorophenyl$ ), 130.9 (2C,  $C^2$   $4-Fluorophenyl$ ,  $C^6$   $4-Fluorophenyl$ ), 148.2 (1C,  $C^4$   $Pyridine$ , quart.), 148.5 (1C,  $C^6$   $Pyridine$ ), 158.7 (1C,  $C^2$   $Pyridine$ , quart.), 162.3 (d, 1C,  $^1J(C,F) = 243.2$  Hz,  $C^4$   $4-Fluorophenyl$ -F, quart.). The signals for  $C^1$   $4-Fluorophenyl$ ,  $C^2$   $Imidazole$ ,  $C^4$   $Imidazole$  and  $C^5$   $Imidazole$  are not seen in the spectrum; **FT-IR** (ATR,  $cm^{-1}$ ) = 3292, 2969, 2946, 2850, 1609, 1552, 1499, 1460, 1418, 1375, 1344, 1311, 1296, 1264, 1220, 1193, 1160, 1139, 1087, 1052, 1013, 986, 958, 939, 900, 875, 842, 815, 744, 711, 680, 658. **HR-MS** (ESI) calculated for  $C_{20}H_{21}FN_4O_2S$  [ $M+H^+$ ]  $m/z = 401.1442$ , measured  $m/z = 401.1442$ .

enantioselective, analytical HPLC:

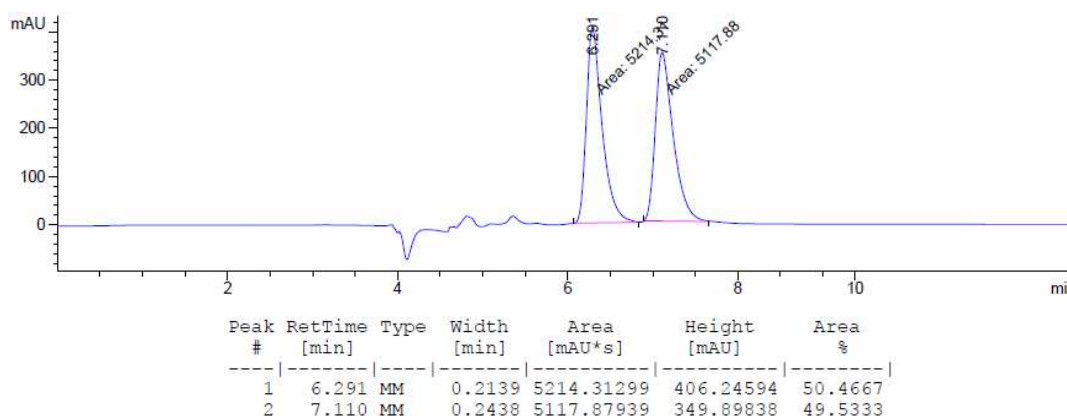

**4-(4-(4-Fluorophenyl)-2-(isopropylsulfinyl)-1H-imidazol-5-yl)-N-isopropylpyridin-2-amine **9e****

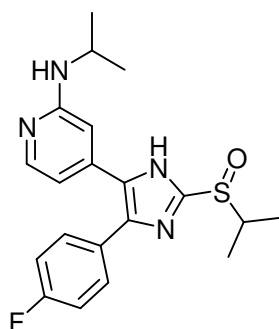

According to the General Procedure B, the title compound **9e** was obtained by the sulfoxidation of compound **8e** (0.25 g, 0.68 mmol), dissolved in 5.0 mL THF and 1.7 mL H<sub>2</sub>O, with an aqueous solution of potassium peroxomonosulfate (Oxone®) (0.24 g, 0.4 mmol in 1.3 mL H<sub>2</sub>O) after stirring for 3 h at T = 0 °C and treatment with isopropyl ether as a beige solid (0.21 g, 83.8%).

C<sub>20</sub>H<sub>23</sub>FN<sub>4</sub>OS (M<sub>r</sub> = 386.49 g/mol); **HPLC**:  $t_R$  = 4.23 min, purity: 99.0% ( $\lambda$  = 254 nm),  $t_R$  = 4.23 min, purity: 99.1% ( $\lambda$  = 230 nm); **mp** = 170.6 °C; **<sup>1</sup>H-NMR** (200 MHz, DMSO-*d*<sup>6</sup>):  $\delta$  = 1.08 (d,  $J$  = 6.2 Hz, 6H, NHCH(CH<sub>3</sub>)<sub>2</sub>), 1.15 (d,  $J$  = 6.95 Hz, 3H, SOCH(CH<sub>3</sub>)<sub>2</sub>), 1.25 (d,  $J$  = 6.8 Hz, 3H, SOCH(CH<sub>3</sub>)<sub>2</sub>), 3.37-3.55 (m, 1H, SOCH(CH<sub>3</sub>)<sub>2</sub>), 3.77-4.02 (m, 1H, NHCH(CH<sub>3</sub>)<sub>2</sub>), 6.27-6.47 (m, 2H, C<sup>5</sup>-H<sub>pyridine</sub> and NHCH(CH<sub>3</sub>)<sub>2</sub>, exchangeable with D<sub>2</sub>O),

6.59 (s, 1H, C<sup>3</sup>-H<sub>Pyridine</sub>), 7.09-7.38 (m, 2H, C<sup>3</sup>-H<sub>4-Fluorophenyl</sub>, C<sup>5</sup>-H<sub>4-Fluorophenyl</sub>), 7.42-7.60 (m, 2H, C<sup>2</sup>-H<sub>4-Fluorophenyl</sub>, C<sup>6</sup>-H<sub>4-Fluorophenyl</sub>), 7.85 (s, 1H, C<sup>6</sup>-H<sub>Pyridine</sub>), 13.69 (s, 1H, *NH*<sub>Imidazole</sub>, exchangeable with D<sub>2</sub>O); <sup>13</sup>C-NMR (50 MHz, DMSO-*d*<sup>6</sup>): δ [ppm] = 15.2 (1C, SOCH(CH<sub>3</sub>)<sub>2</sub>), 15.7 (1C, SOCH(CH<sub>3</sub>)<sub>2</sub>), 23.0 (2C, NHCH(CH<sub>3</sub>)<sub>2</sub>), 42.0 (1C, NHCH(CH<sub>3</sub>)<sub>2</sub>), 53.2 (1C, SOCH(CH<sub>3</sub>)<sub>2</sub>), 106.2 (1C, C<sup>3</sup><sub>Pyridine</sub>), 110.2 (1C, C<sup>5</sup><sub>Pyridine</sub>), 115.9 (d, 2C, <sup>2</sup>*J*(C,F) = 21.6 Hz, C<sup>3</sup><sub>4-Fluorophenyl</sub>, C<sup>5</sup><sub>4-Fluorophenyl</sub>), 131.3 (2C, C<sup>2</sup><sub>4-Fluorophenyl</sub>, C<sup>6</sup><sub>4-Fluorophenyl</sub>), 146.3 (1C, C<sup>4</sup><sub>Pyridine</sub>, quart.), 148.1 (1C, C<sup>6</sup><sub>Pyridine</sub>), 158.9 (1C, C<sup>2</sup><sub>Pyridine</sub>, quart.). The signals for C<sup>4</sup><sub>4-Fluorophenyl</sub>, C<sup>1</sup><sub>4-Fluorophenyl</sub>, C<sup>2</sup><sub>Imidazole</sub>, C<sup>4</sup><sub>Imidazole</sub> and C<sup>5</sup><sub>Imidazole</sub> are not seen in the spectrum; **FT-IR** (ATR, cm<sup>-1</sup>) = 3297, 2969, 2937, 2872, 1609, 1552, 1500, 1462, 1383, 1368, 1327, 1306, 1285, 1223, 1193, 1176, 1160, 1126, 1097, 1054, 1040, 1025, 987, 963, 893, 841, 810, 743, 722, 707, 688, 656; **HR-MS** (ESI) calculated for C<sub>20</sub>H<sub>23</sub>FN<sub>4</sub>OS [M+H<sup>+</sup>] *m/z* = 387.1649, measured *m/z* = 387.1649.

enantioselective, analytical HPLC:

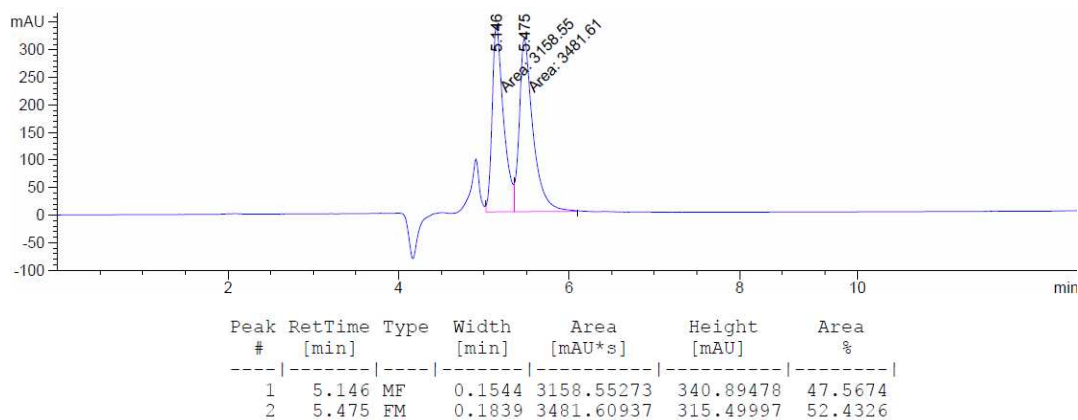

**2-(4-Fluorophenyl)-N-(4-(4-(4-fluorophenyl)-2-(methylsulfinyl)-1H-imidazol-5-yl)pyridin-2-yl)acetamide 9f**

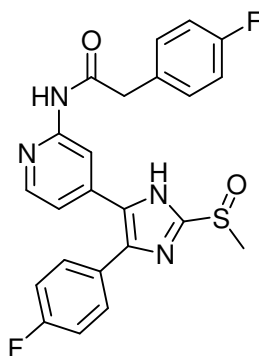

According to the General Procedure B, the title compound **9f** was obtained by the sulfoxidation of compound **8f** (0.30 g, 0.69 mmol), dissolved in 5.0 mL THF and 0.9 mL H<sub>2</sub>O, with an aqueous solution of potassium peroxomonosulfate (Oxone®) (0.23 g, 0.4 mmol in 1.3 mL water) after stirring for 1.5 h at T = 0 °C and flash chromatography on silica gel (THF/hexane 1:1) as a yellow solid (0.16 g, 51.5%).

C<sub>23</sub>H<sub>18</sub>F<sub>2</sub>N<sub>4</sub>O<sub>2</sub>S (M<sub>r</sub> = 452.49 g/mol); **HPLC**:  $t_R$  = 6.78 min, purity: 98.5% ( $\lambda$  = 254 nm),  $t_R$  = 6.78 min, purity: 99.1% ( $\lambda$  = 230 nm); **mp** = 222.7 °C; **<sup>1</sup>H-NMR** (200 MHz, DMSO-*d*<sup>6</sup>):  $\delta$  [ppm] = 3.06 (s, 3H, SOCH<sub>3</sub>), 3.68 (s, 2H, CH<sub>2</sub>), 7.01 (d, 1H,  $J$  = 5.1 Hz, 1H, C<sup>5</sup>-H<sub>Pyridine</sub>), 7.13 (t,  $J$  = 8.7 Hz, 2H, C<sup>3</sup>-H<sub>4-Fluorophenylacetamide</sub>, C<sup>5</sup>-H<sub>4-Fluorophenylacetamide</sub>), 7.20-7.41 (m, 4H, C<sup>3</sup>-H<sub>4-Fluorophenyl</sub>, C<sup>5</sup>-H<sub>4-Fluorophenyl</sub>, C<sup>2</sup>-H<sub>4-Fluorophenylacetamide</sub>, C<sup>6</sup>-H<sub>4-Fluorophenylacetamide</sub>), 7.43-7.60 (m, 2H, C<sup>2</sup>-H<sub>4-Fluorophenyl</sub>, C<sup>6</sup>-H<sub>4-Fluorophenyl</sub>), 8.20 (d, 1H,  $J$  = 5.1 Hz, 1H, C<sup>6</sup>-H<sub>Pyridine</sub>), 8.30 (s, 1H, C<sup>3</sup>-H<sub>Pyridine</sub>), 10.70 (s, 1H, NHCO, exchangeable with D<sub>2</sub>O), 13.89 (s, 1H, NH<sub>Imidazole</sub>, exchangeable with D<sub>2</sub>O); **<sup>13</sup>C-NMR** (50 MHz, DMSO-*d*<sup>6</sup>):  $\delta$  [ppm] = 39.9 (1C, SOCH<sub>3</sub>), 42.4 (1C, CH<sub>2</sub>), 111.5 (1C, C<sup>3</sup><sub>Pyridin</sub>), 115.4 (d, 2C,  $^2J(C,F)$  = 21.1 Hz, C<sup>3</sup><sub>4-Fluorophenylacetamide</sub>, C<sup>5</sup><sub>4-Fluorophenylacetamide</sub>), 116.1 (d, 2C,  $^2J(C,F)$  = 21.6 Hz, C<sup>3</sup><sub>4-Fluorophenyl</sub>, C<sup>5</sup><sub>4-Fluorophenyl</sub>), 117.5 (1C, C<sup>5</sup><sub>Pyridine</sub>), 126.6 (1C, C<sup>1</sup><sub>4-Fluorophenyl</sub>, quart.), 131.3 (d, 2C,  $^3J(C,F)$  = 8.0 Hz, C<sup>2</sup><sub>4-Fluorophenylacetamide</sub>, C<sup>6</sup><sub>4-Fluorophenylacetamide</sub>), 132.3 (d, 1C,  $^4J(C,F)$  = 3.1 Hz, C<sup>1</sup><sub>4-Fluorophenylacetamide</sub>, quart.), 148.4 (1C, C<sup>4</sup><sub>Pyridine</sub>, quart.), 149.1 (1C, C<sup>6</sup><sub>Pyridine</sub>), 152.9 (1C,



$C^2_{\text{Pyridine}}$ , quart.), 161.5 (d, 1C,  $^1J(C,F) = 240.8$  Hz,  $C^4_{4\text{-Fluorophenylacetamide-F}}$ , quart.), 162.5 (d, 1C,  $^1J(C,F) = 244.9$  Hz,  $C^4_{4\text{-Fluorophenyl-F}}$ , quart.), 170.2 (1C,  $C=O$ , quart.). The signals for  $C^4_{\text{Imidazole}}$ ,  $C^2_{\text{Imidazole}}$ ,  $C^5_{\text{Imidazole}}$ ,  $C^2_{4\text{-Fluorophenyl}}$  and  $C^6_{4\text{-Fluorophenyl}}$  are not seen in the spectrum; **FT-IR** (ATR,  $\text{cm}^{-1}$ ) = 3040, 2035, 1689, 1608, 1550, 1501, 1455, 1414, 1371, 1339, 1302, 1258, 1225, 1181, 1157, 1116, 1093, 1019, 996, 980, 961, 885, 835, 813, 790, 751, 718, 704, 689. **HR-MS** (ESI) calculated for  $\text{C}_{23}\text{H}_{18}\text{F}_2\text{N}_4\text{O}_2\text{S}$   $[\text{M}+\text{Na}^+]$   $m/z = 475.1011$ , measured  $m/z = 475.1013$ .

enantioselective, analytical HPLC:

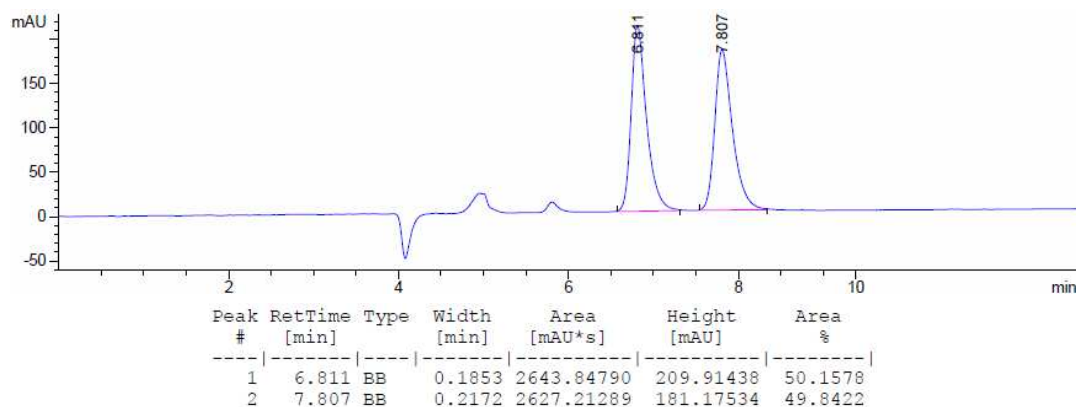

**4-(4-(4-Fluorophenyl)-2-(methylsulfinyl)-1H-imidazol-5-yl)-N-((R)-1-phenylethyl)pyridin-2-amine 9g**

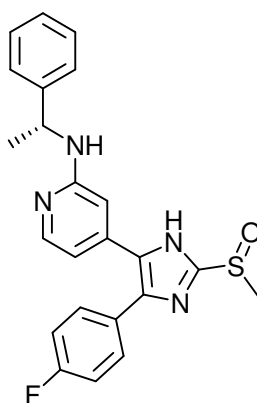

According to the General Procedure B, the title compound **9g** was obtained by the sulfoxidation of compound **8g** (0.12 g, 0.30 mmol), dissolved in 3.0 mL THF and 0.5 mL H<sub>2</sub>O, with an aqueous solution of potassium peroxomonosulfate (Oxone®) (0.10 g, 0.17 mmol in 1.0 mL water) after stirring for 2.5 h at T = 0 °C and flash chromatography (silica gel, EtOAc/MeOH 9:1) as a pale yellow solid (0.08 g, 63.4%).

C<sub>23</sub>H<sub>21</sub>FN<sub>4</sub>OS (M<sub>r</sub> = 420.5 g/mol); **HPLC**:  $t_R$  = 5.24 min, purity: 98.9% ( $\lambda$  = 254 nm),  $t_R$  = 5.24 min, purity: 98.9% ( $\lambda$  = 230 nm);  $[\alpha]^{20}_D$  = +39.14 ( $c$  = 0.419 in Methanol); **mp** = 197.1 °C; **<sup>1</sup>H-NMR** (Methanol- $d^4$ , 400 MHz)  $\delta$  = 1.42-1.50 (m, 3H, CHCH<sub>3</sub>), 3.11 (s, 3H, SO-CH<sub>3</sub>), 4.63-4.73 (m, 1H, CHCH<sub>3</sub>), 6.56 (s, 1H, C<sup>3</sup>-H<sub>Pyridine</sub>), 6.65 (d,  $J$  = 5.31 Hz, 1H, C<sup>5</sup>-H<sub>Pyridine</sub>), 7.06-7.20 (m, 3H, C<sup>3</sup>-H<sub>4-Fluorophenyl</sub>, C<sup>5</sup>-H<sub>4-Fluorophenyl</sub>, C<sup>4</sup>-H<sub>Phenylethylamine</sub>), 7.21-7.31 (m, 4H, C<sup>2</sup>-H<sub>Phenylethylamine</sub>, C<sup>3</sup>-H<sub>Phenylethylamine</sub>, C<sup>5</sup>-H<sub>Phenylethylamine</sub>, C<sup>6</sup>-H<sub>Phenylethylamine</sub>), 7.39-7.49 (m, 2H, C<sup>2</sup>-H<sub>4-Fluorophenyl</sub>, C<sup>6</sup>-H<sub>4-Fluorophenyl</sub>), 7.85 (d,  $J$  = 5.3 Hz, 1H, C<sup>6</sup>-H<sub>Pyridine</sub>); **<sup>13</sup>C-NMR** (Methanol- $d^4$ , 100 MHz)  $\delta$  = 24.4 (1C, CHCH<sub>3</sub>), 39.9 (1C, SO-CH<sub>3</sub>), 52.5 (1C, CHCH<sub>3</sub>), 107.5 (1C, C<sup>3</sup><sub>Pyridine</sub>), 112.4 (1C, C<sup>5</sup><sub>Pyridine</sub>), 116.7 (d, 2C,  $^2J(C,F)$  = 21.8 Hz, C<sup>3</sup><sub>4-Fluorophenyl</sub>, C<sup>5</sup><sub>4-Fluorophenyl</sub>), 126.9 (2C, C<sup>2</sup><sub>Phenylethylamine</sub>, C<sup>6</sup><sub>Phenylethylamine</sub>), 127.8 (1C, C<sup>4</sup><sub>Phenylethylamine</sub>), 129.2 (d, 1C,  $^4J(C,F)$  = 2.2 Hz, C<sup>1</sup><sub>4-Fluorophenyl</sub>, quart.), 129.5 (2C, C<sup>3</sup><sub>Phenylethylamine</sub>, C<sup>5</sup><sub>Phenylethylamine</sub>), 131.9 (2C,  $^3J(C,F)$  = 8.0 Hz, C<sup>2</sup><sub>4-Fluorophenyl</sub>, C<sup>6</sup><sub>4-Fluorophenyl</sub>), 135.4 (1C, C<sup>5</sup><sub>Imidazole</sub>, quart.), 136.8 (1C, C<sup>4</sup><sub>Imidazole</sub>, quart.), 143.4 (1C, C<sup>4</sup><sub>Pyridine</sub>, quart.), 146.3 (1C, C<sup>1</sup><sub>Phenylethylamine</sub>, quart.), 148.2 (1C, C<sup>6</sup><sub>Pyridine</sub>), 149.2 (1C, C<sup>2</sup><sub>Imidazole</sub>, quart.), 159.7 (1C, C<sup>2</sup><sub>Pyridine</sub>, quart.), 164.3 (d, 1C,  $^1J(C,F)$  = 245.7 Hz, C<sup>4</sup><sub>4-Fluorophenyl-F</sub>, quart.); **FT-IR** (ATR, cm<sup>-1</sup>): 2972, 1607, 1549, 1502, 1424, 1297, 1222, 1158, 1095, 1025, 956, 839, 814, 762, 700; **HR-MS** calculated for C<sub>23</sub>H<sub>21</sub>FN<sub>4</sub>OS  $m/z$  = 420.1415, measured  $m/z$  = 420.1418.

enantioselective, analytical HPLC:

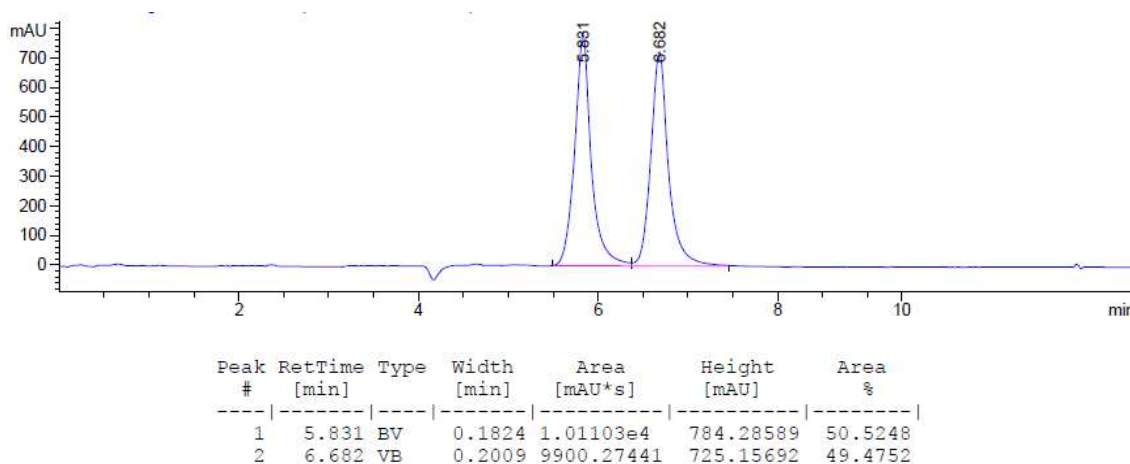

**4-(4-(4-Fluorophenyl)-2-(methylsulfinyl)-1*H*-imidazol-5-yl)-*N*-((*S*)-1-phenylethyl)pyridin-2-amine **9h****

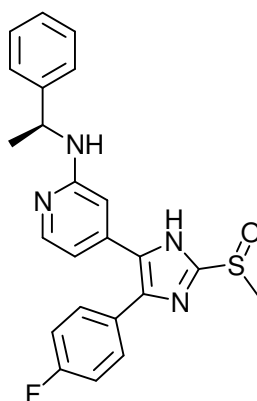

According to the General Procedure B, the title compound **9h** was obtained by the sulfoxidation of compound **8h** (12.14 g, 30.0 mmol), dissolved in 273.0 mL THF and 90.0 mL H<sub>2</sub>O, with an aqueous solution of potassium peroxomonosulfate (Oxone®) (9.77 g, 15.9 mmol in 176.0 mL water) after stirring for 2.5 h at T = 0 °C and treatment with a solvent mixture of cyclohexane and isopropyl ether as a colorless solid (11.26 g, 91.8%). C<sub>23</sub>H<sub>21</sub>FN<sub>4</sub>OS (M<sub>r</sub> = 420.5 g/mol); **HPLC**: *t<sub>R</sub>* = 5.24 min, purity: 96.9% (λ = 254 nm), *t<sub>R</sub>* = 5.24 min, purity: 96.7% (λ = 230 nm); [α]<sub>D</sub><sup>20</sup> = -41.17 (c = 1.014 in Methanol); **mp** = 140.2 °C; **<sup>1</sup>H-NMR** (Methanol-*d*<sup>4</sup>, 400 MHz) δ = 1.45-1.49 (m, 3H, CHCH<sub>3</sub>), 3.11 (s, 3H, SO-CH<sub>3</sub>), 4.68 (q, *J* = 6.6 Hz, 1H, CHCH<sub>3</sub>), 6.57 (s, 1H, C<sup>3</sup>-H<sub>Pyridine</sub>), 6.60-6.69 (m, 1H, C<sup>5</sup>-H<sub>Pyridine</sub>),

7.07-7.20 (m, 3H, C<sup>3</sup>-H<sub>4</sub>-Fluorophenyl, C<sup>5</sup>-H<sub>4</sub>-Fluorophenyl, C<sup>4</sup>-H<sub>Phenylethylamine</sub>), 7.20-7.30 (m, 4H, C<sup>2</sup>-H<sub>Phenylethylamine</sub>, C<sup>3</sup>-H<sub>Phenylethylamine</sub>, C<sup>5</sup>-H<sub>Phenylethylamine</sub>, C<sup>6</sup>-H<sub>Phenylethylamine</sub>), 7.38-7.51 (m, 2H, C<sup>2</sup>-H<sub>4</sub>-Fluorophenyl, C<sup>6</sup>-H<sub>4</sub>-Fluorophenyl), 7.85 (d,  $J = 5.6$  Hz, 1H, C<sup>6</sup>-H<sub>Pyridine</sub>); **<sup>13</sup>C-NMR** (Methanol-*d*<sup>4</sup>, 100 MHz)  $\delta = 24.4$  (1C, CHCH<sub>3</sub>), 40.0 (1C, SO-CH<sub>3</sub>), 52.6 (1C, CHCH<sub>3</sub>), 107.5 (1C, C<sup>3</sup><sub>Pyridine</sub>), 112.3 (1C, C<sup>5</sup><sub>Pyridine</sub>), 116.8 (d, 2C,  $^2J(C,F) = 21.8$  Hz, C<sup>3</sup><sub>4-Fluorophenyl</sub>, C<sup>5</sup><sub>4-Fluorophenyl</sub>), 126.9 (2C, C<sup>2</sup><sub>Phenylethylamine</sub>, C<sup>6</sup><sub>Phenylethylamine</sub>), 127.9 (1C, C<sup>4</sup><sub>Phenylethylamine</sub>), 128.6 (d, 1C,  $^4J(C,F) = 2.2$  Hz, C<sup>1</sup><sub>4-Fluorophenyl</sub>, quart), 129.5 (2C, C<sup>3</sup><sub>Phenylethylamine</sub>, C<sup>5</sup><sub>Phenylethylamine</sub>), 131.9 (2C,  $^3J(C,F) = 8.0$  Hz, C<sup>2</sup><sub>4-Fluorophenyl</sub>, C<sup>6</sup><sub>4-Fluorophenyl</sub>), 135.2 (1C, C<sup>5</sup><sub>Imidazole</sub>, quart.), 136.3 (1C, C<sup>4</sup><sub>Imidazole</sub>, quart.), 143.1 (1C, C<sup>4</sup><sub>Pyridine</sub>, quart.), 146.3 (1C, C<sup>1</sup><sub>Phenylethylamine</sub>, quart.), 148.2 (1C, C<sup>6</sup><sub>Pyridine</sub>), 148.7 (1C, C<sup>2</sup><sub>Imidazole</sub>, quart.), 159.7 (1C, C<sup>2</sup><sub>Pyridine</sub>, quart.), 164.4 (d, 1C,  $^1J(C,F) = 245.7$  Hz, C<sup>4</sup><sub>4-Fluorophenyl-F</sub>, quart.); **FT-IR** (ATR, cm<sup>-1</sup>): 3250, 3061, 3027, 2971, 2926, 2850, 1647, 1608, 1550, 1518, 1504, 1450, 1375, 1354, 1290, 1224, 1183, 1158, 1094, 1041, 1026, 977, 957, 909, 839, 814, 762, 744, 700; **HR-MS** calculated for C<sub>23</sub>H<sub>21</sub>FN<sub>4</sub>OS  $m/z = 420.1415$ , measured  $m/z = 420.1419$ .

enantioselective, analytical HPLC:

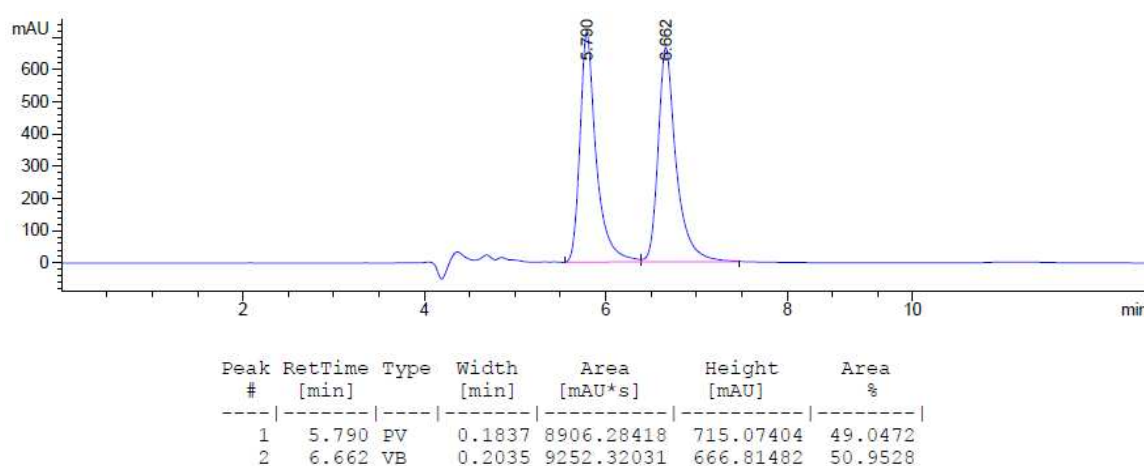

***N*-Cyclohexyl-4-(4-(4-fluorophenyl)-2-(methylsulfinyl)-1*H*-imidazol-5-yl)pyridin-2-amine **9i****

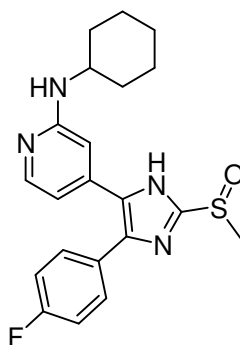

According to the General Procedure B, the title compound **9i** was obtained by the sulfoxidation of compound **8i** (0.15 g, 0.4 mmol), dissolved in 4.0 mL THF and 1.0 mL H<sub>2</sub>O, with an aqueous solution of potassium peroxomonosulfate (Oxone®) (0.14 g, 0.22 mmol in 1.0 mL water) after stirring for 2 h at T = 0 °C and flash chromatography (silica gel, EtOAc/MeOH 9:1) as a colorless solid (0.09 g, 56.5%).

C<sub>21</sub>H<sub>23</sub>FN<sub>4</sub>OS (M<sub>r</sub> = 398.5 g/mol); **HPLC**: *t*<sub>R</sub> = 4.95 min, purity: 96.0% (λ = 254 nm), *t*<sub>R</sub> = 4.95 min, purity: 95.4% (λ = 230 nm); **mp** = 221.8 °C; **<sup>1</sup>H-NMR** (DMSO-*d*<sup>6</sup>, 400 MHz) δ = 1.04-1.34 (m, 5H, CH<sub>2</sub>, Cyclohexyl), 1.49-1.91 (m, 5H, CH<sub>2</sub>, Cyclohexyl), 3.07 (s, 3H, SO-CH<sub>3</sub>), 3.47-3.58 (m, 1H, CH, Cyclohexyl), 6.38 (d, *J* = 7.1 Hz, 1H, NH<sub>Cyclohexyl</sub>), 6.44 (d, *J* = 5.1 Hz, 1H, C<sup>5</sup>-H<sub>Pyridine</sub>), 6.54 (s, 1H, C<sup>3</sup>-H<sub>Pyridine</sub>), 7.27 (t, *J* = 8.5 Hz, 2H, C<sup>3</sup>-H<sub>4-Fluorophenyl</sub>, C<sup>5</sup>-H<sub>4-Fluorophenyl</sub>), 7.53 (dd, *J*<sub>1</sub> = 8.5 Hz, *J*<sub>2</sub> = 5.7 Hz, 2H, C<sup>2</sup>-H<sub>4-Fluorophenyl</sub>, C<sup>6</sup>-H<sub>4-Fluorophenyl</sub>), 7.89 (d, *J* = 4.8 Hz, 1H, C<sup>6</sup>-H<sub>Pyridine</sub>), 13.83 (brs, 1H, NH<sub>Imidazole</sub>); **<sup>13</sup>C-NMR** (DMSO-*d*<sup>6</sup>, 100 MHz) δ = 24.7 (2C, CH<sub>2</sub>, C<sup>3</sup><sub>Cyclohexyl</sub>, C<sup>5</sup><sub>Cyclohexyl</sub>), 25.5 (1C, CH<sub>2</sub>, C<sup>4</sup><sub>Cyclohexyl</sub>), 32.6 (2C, CH<sub>2</sub>, C<sup>2</sup><sub>Cyclohexyl</sub>, C<sup>6</sup><sub>Cyclohexyl</sub>), 38.9 (1C, SO-CH<sub>3</sub>), 49.0 (1C, CH, C<sup>1</sup><sub>Cyclohexyl</sub>), 105.6 (1C, C<sup>3</sup><sub>Pyridine</sub>), 109.7 (1C, C<sup>5</sup><sub>Pyridine</sub>), 115.6 (d, 2C, <sup>2</sup>*J*(C,F) = 21.1 Hz, C<sup>3</sup><sub>4-Fluorophenyl</sub>, C<sup>5</sup><sub>4-Fluorophenyl</sub>), 130.5 (2C, C<sup>2</sup><sub>4-Fluorophenyl</sub>, C<sup>6</sup><sub>4-Fluorophenyl</sub>), 147.9 (1C, C<sup>6</sup><sub>Pyridine</sub>), 148.1 (1C, C<sup>4</sup><sub>Pyridine</sub>, quart.), 158.5 (1C, C<sup>2</sup><sub>Pyridine</sub>, quart.), 161.9 (d, 1C, <sup>1</sup>*J*(C,F) = 243.6 Hz, C<sup>4</sup><sub>4-Fluorophenyl</sub>-F, quart.); **FT-IR** (ATR, cm<sup>-1</sup>): 3299, 2936, 2859, 1609, 1550, 1498, 1458, 1419, 1374, 1343, 1291, 1219, 1161, 1088,

1041, 966, 935, 888, 841, 810, 744, 708, 680; **HR-MS** calculated for C<sub>21</sub>H<sub>23</sub>FN<sub>4</sub>OS m/z = 398.1571, measured m/z = 398.1580.

enantioselective, analytical HPLC:

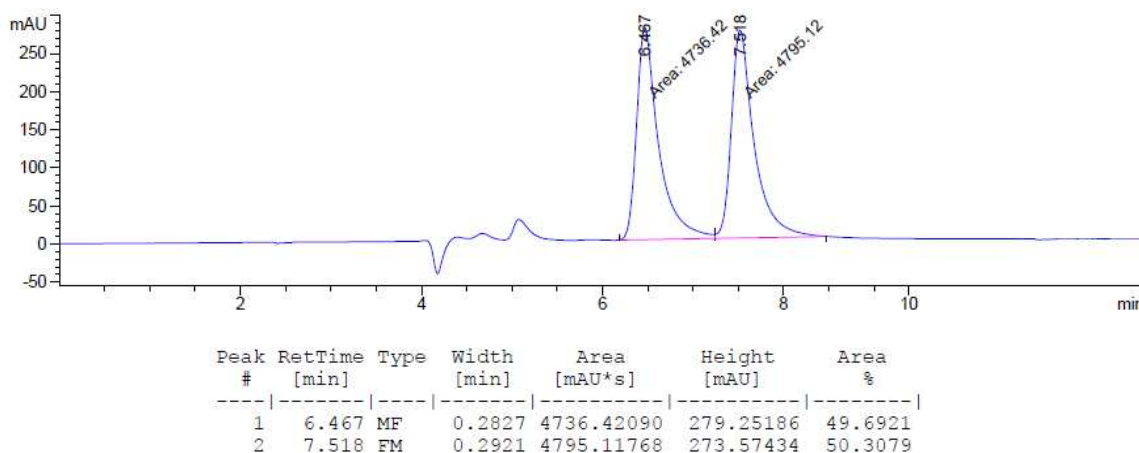

**4-(4-(4-Fluorophenyl)-2-(methylsulfinyl)-1*H*-imidazol-5-yl)-*N*-((*S*)-3-methylbutan-2-yl)pyridin-2-amine 9j**

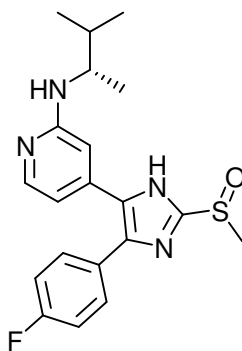

According to the General Procedure B, the title compound **9j** was obtained by the sulfoxidation of compound **8j** (0.93 g, 2.51 mmol), dissolved in 20.0 mL THF and 5.0 mL H<sub>2</sub>O, with an aqueous solution of potassium peroxomonosulfate (Oxone®) (0.79 g, 1.30 mmol in 22.0 mL water) after stirring for 2.0 h at T = 0 °C and treatment with a solvent mixture of EtOAc and isopropyl ether as a colorless solid (0.74 g, 78.5%).

C<sub>20</sub>H<sub>23</sub>FN<sub>4</sub>OS (M<sub>r</sub> = 386.49 g/mol); **HPLC**: *t<sub>R</sub>* = 4.74 min, purity: 97.8% (λ = 254 nm), *t<sub>R</sub>* = 4.74 min, purity: 98.3% (λ = 230 nm); [α]<sub>D</sub><sup>20</sup> = +25.24 (c = 0.525 in Methanol); **mp** = 163.8

°C; **<sup>1</sup>H-NMR** (Methanol-*d*<sup>4</sup>, 400 MHz)  $\delta$  = 0.92 (t,  $J$  = 6.7 Hz, 6H, CH(CH<sub>3</sub>)<sub>2</sub>), 1.09 (d,  $J$  = 6.6 Hz, 3H, NHCHCH<sub>3</sub>), 1.67-1.81 (m, 1H, CH(CH<sub>3</sub>)<sub>2</sub>), 3.15 (s, 3H, SO-CH<sub>3</sub>), 3.46-3.60 (m, 1H, CH(CH<sub>3</sub>)<sub>2</sub>), 6.60 (dd,  $J_1$  = 5.6 Hz,  $J_2$  = 1.3 Hz, 1H, C<sup>5</sup>-H<sub>Pyridine</sub>), 6.63 (s, 1H, C<sup>3</sup>-H<sub>Pyridine</sub>), 7.13-7.24 (m, 2H, C<sup>3</sup>-H<sub>4-Fluorophenyl</sub>, C<sup>5</sup>-H<sub>4-Fluorophenyl</sub>), 7.56-7.58 (m, 2H, C<sup>2</sup>-H<sub>4-Fluorophenyl</sub>, C<sup>6</sup>-H<sub>4-Fluorophenyl</sub>), 7.84 (d,  $J$  = 5.6 Hz, 1H, C<sup>6</sup>-H<sub>Pyridine</sub>); **<sup>13</sup>C-NMR** (Methanol-*d*<sup>4</sup>, 100 MHz)  $\delta$  = 17.3 (1C, CH(CH<sub>3</sub>)<sub>2</sub>), 18.4 (1C, NHCHCH<sub>3</sub>), 19.5 (1C, CH(CH<sub>3</sub>)<sub>2</sub>), 34.0 (1C, CH(CH<sub>3</sub>)<sub>2</sub>), 40.0 (1C, SO-CH<sub>3</sub>), 53.2 (1C, NHCHCH<sub>3</sub>), 107.6 (1C, C<sup>3</sup><sub>Pyridine</sub>), 111.6 (1C, C<sup>5</sup><sub>Pyridine</sub>), 116.8 (d, 2C, <sup>2</sup> $J$ (C,F) = 21.8 Hz, C<sup>3</sup><sub>4-Fluorophenyl</sub>, C<sup>5</sup><sub>4-Fluorophenyl</sub>), 129.0 (d, 1C, <sup>4</sup> $J$ (C,F) = 2.9 Hz, C<sup>1</sup><sub>4-Fluorophenyl</sub>, quart.), 132.0 (2C, <sup>3</sup> $J$ (C,F) = 8.0 Hz, C<sup>2</sup><sub>4-Fluorophenyl</sub>, C<sup>6</sup><sub>4-Fluorophenyl</sub>), 135.3 (1C, C<sup>5</sup><sub>Imidazole</sub>, quart.), 136.7 (1C, C<sup>4</sup><sub>Imidazole</sub>, quart.), 143.7 (1C, C<sup>4</sup><sub>Pyridine</sub>, quart.), 147.7 (1C, C<sup>6</sup><sub>Pyridine</sub>), 149.0 (1C, C<sup>2</sup><sub>Imidazole</sub>, quart.), 160.0 (1C, C<sup>2</sup><sub>Pyridine</sub>, quart.), 164.4 (d, 1C, <sup>1</sup> $J$ (C,F) = 245.7 Hz, C<sup>4</sup><sub>4-Fluorophenyl</sub>-F, quart.); **FT-IR** (ATR, cm<sup>-1</sup>): 3305, 2965, 2877, 2739, 1608, 1549, 1499, 1459, 1419, 1406, 1390, 1371, 1312, 1296, 1284, 1223, 1185, 1160, 1120, 1098, 1052, 1015, 1001, 985, 967, 954, 934, 906, 880, 839, 812, 770, 744, 724, 707, 678; **HR-MS** calculated for C<sub>20</sub>H<sub>23</sub>FN<sub>4</sub>OS  $m/z$  = 386.1571, measured  $m/z$  = 386.1559.

enantioselective, analytical HPLC:

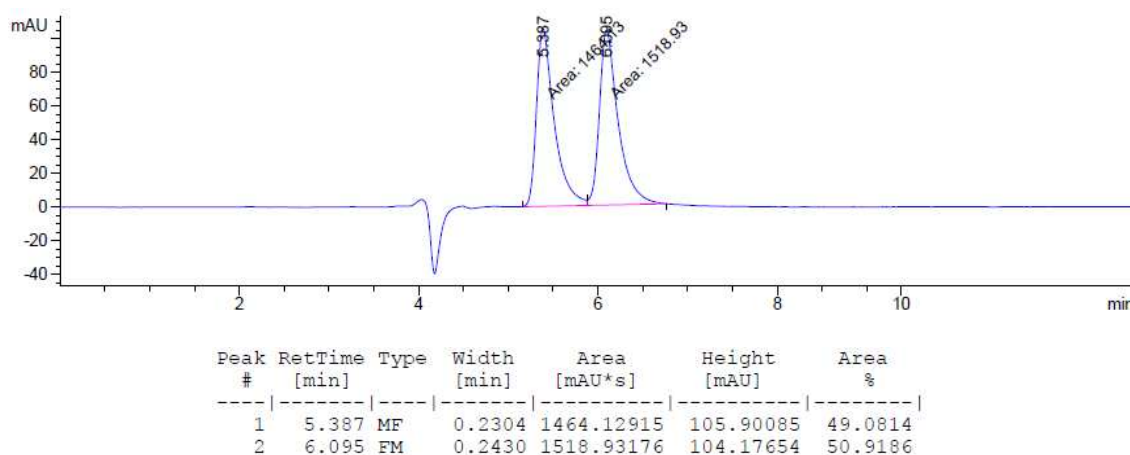

**4-(4-(4-Fluorophenyl)-2-(methylsulfinyl)-1*H*-imidazol-5-yl)-*N*-((*R*)-3-methylbutan-2-yl)pyridin-2-amine 9k**

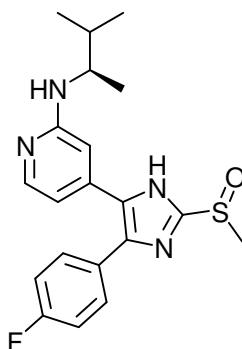

According to the General Procedure B, the title compound **9k** was obtained by the sulfoxidation of compound **8k** (0.38 g, 1.03 mmol), dissolved in 8.0 mL THF and 3.0 mL H<sub>2</sub>O, with an aqueous solution of potassium peroxomonosulfate (Oxone®) (0.32 g, 0.5 mmol in 9.0 mL water) after stirring for 4.0 h at T = 0 °C and flash chromatography on silica gel (EtOAc/EtOH 95:5) as a beige solid (0.24 g, 61.1%).

C<sub>20</sub>H<sub>23</sub>FN<sub>4</sub>OS (M<sub>r</sub> = 386.49 g/mol); **HPLC**: *t<sub>R</sub>* = 3.99 min, purity: 95.4% (λ = 254 nm), *t<sub>R</sub>* = 3.99 min, purity: 95.5% (λ = 230 nm); [α]<sub>D</sub><sup>20</sup> = -27.60 (*c* = 0.253 in Methanol); **mp** = 147.9 °C; **<sup>1</sup>H-NMR** (Methanol-*d*<sup>4</sup>, 400 MHz) δ = 0.93 (t, *J* = 6.2 Hz, 6H, CH(CH<sub>3</sub>)<sub>2</sub>), 1.11 (d, *J* = 6.6 Hz, 3H, NHCHCH<sub>3</sub>), 1.69-1.82 (m, 1H, CH(CH<sub>3</sub>)<sub>2</sub>), 3.15 (s, 3H, SO-CH<sub>3</sub>), 3.48-3.58 (m, 1H, CH(CH<sub>3</sub>)<sub>2</sub>), 6.66 (d, *J* = 5.8 Hz, 1H, C<sup>5</sup>-H<sub>Pyridine</sub>), 6.72 (s, 1H, C<sup>3</sup>-H<sub>Pyridine</sub>), 7.21 (t, *J* = 8.6 Hz, 2H, C<sup>3</sup>-H<sub>4-Fluorophenyl</sub>, C<sup>5</sup>-H<sub>4-Fluorophenyl</sub>), 7.54 (dd, *J*<sub>1</sub> = 8.1 Hz, *J*<sub>2</sub> = 5.3 Hz, 2H, C<sup>2</sup>-H<sub>4-Fluorophenyl</sub>, C<sup>6</sup>-H<sub>4-Fluorophenyl</sub>), 7.82 (d, *J* = 5.6 Hz, 1H, C<sup>6</sup>-H<sub>Pyridine</sub>); **<sup>13</sup>C-NMR** (Methanol-*d*<sup>4</sup>, 100 MHz) δ = 17.2 (1C, CH(CH<sub>3</sub>)<sub>2</sub>), 18.4 (1C, NHCHCH<sub>3</sub>), 19.5 (1C, CH(CH<sub>3</sub>)<sub>2</sub>), 34.0 (1C, CH(CH<sub>3</sub>)<sub>2</sub>), 40.0 (1C, SO-CH<sub>3</sub>), 53.5 (1C, NHCHCH<sub>3</sub>), 107.9 (1C, C<sup>3</sup><sub>Pyridine</sub>), 111.5 (1C, C<sup>5</sup><sub>Pyridine</sub>), 116.9 (d, 2C, <sup>2</sup>*J*(C,F) = 21.8 Hz, C<sup>3</sup><sub>4-Fluorophenyl</sub>, C<sup>5</sup><sub>4-Fluorophenyl</sub>), 128.6 (1C, C<sup>1</sup><sub>4-Fluorophenyl</sub>, quart.), 132.0 (2C, <sup>3</sup>*J*(C,F) = 8.7 Hz, C<sup>2</sup><sub>4-Fluorophenyl</sub>, C<sup>6</sup><sub>4-Fluorophenyl</sub>), 135.1 (1C, C<sup>5</sup><sub>Imidazole</sub>, quart.), 136.8 (1C, C<sup>4</sup><sub>Imidazole</sub>, quart.), 144.1 (1C, C<sup>4</sup><sub>Pyridine</sub>, quart.), 145.8 (1C, C<sup>6</sup><sub>Pyridine</sub>), 149.1 (1C, C<sup>2</sup><sub>Imidazole</sub>, quart.), 159.0 (1C, C<sup>2</sup><sub>Pyridine</sub>, quart.), 164.5 (d, 1C, <sup>1</sup>*J*(C,F) =



245.7 Hz, C<sup>4</sup><sub>4</sub>-Fluorophenyl-F, quart.); **FT-IR** (ATR, cm<sup>-1</sup>): 3302, 2965, 2876, 1646, 1608, 1549, 1499, 1459, 1419, 1406, 1390, 1370, 1317, 1296, 1284, 1223, 1186, 1159, 1142, 1121, 1098, 1051, 1015, 985, 967, 954, 935, 906, 880, 840, 812, 766, 744, 724, 707, 679; **HR-MS** calculated for C<sub>20</sub>H<sub>23</sub>FN<sub>4</sub>OS m/z = 386.1571, measured m/z = 386.1587.

enantioselective analytical HPLC:

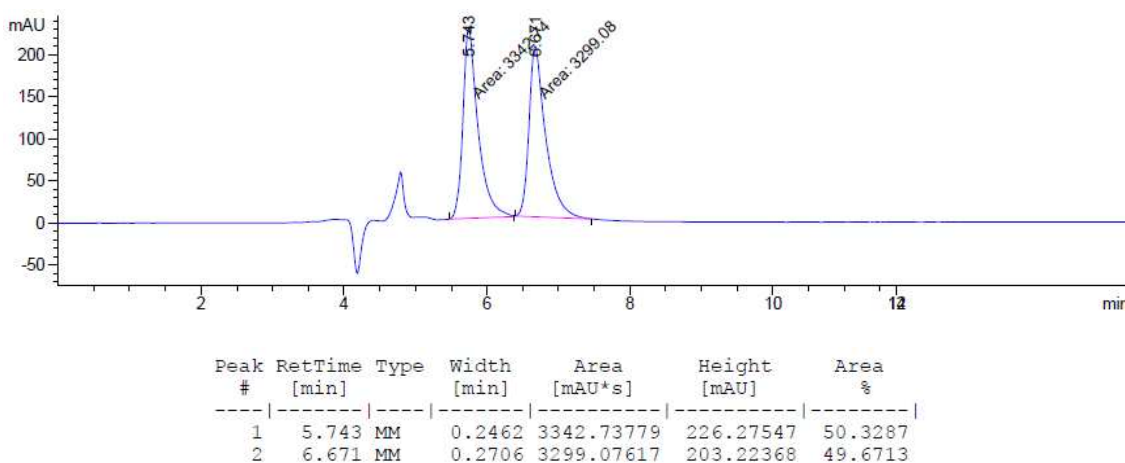

***N*-(4-(4-(4-Fluorophenyl)-2-(methylsulfinyl)-1*H*-imidazol-5-yl)pyridin-2-yl)acetamide **9l****

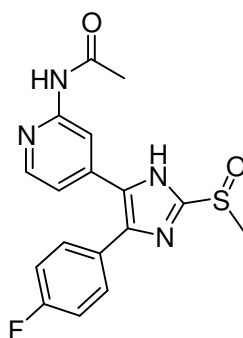

According to the General Procedure B, the title compound **9l** was obtained by the sulfoxidation of compound **8l** (0.28 g, 0.82 mmol), dissolved in 6.0 ml THF and 1.0 ml H<sub>2</sub>O, with an aqueous solution of potassium peroxomonosulfate (Oxone®) (0.28 g, 0.45 mmol in 1.5 ml water) after stirring for 4.0 h at T = 0 °C and flash chromatography on silica gel (EtOAc/EtOH 95:5) as a colorless solid (0.19 g, 64.7 %).

$C_{17}H_{15}FN_4O_2S$  ( $M_r = 358.39$  g/mol); **HPLC**:  $t_R = 4.11$  min, purity: 99.8% ( $\lambda = 254$  nm),  $t_R = 4.11$  min, purity: 99.8% ( $\lambda = 230$  nm); **mp** = 226.0 °C;  **$^1H$ -NMR** (DMSO- $d^6$ , 400 MHz)  $\delta$  = 2.02 (s, 3H, CO- $CH_3$ ), 3.05 (s, 3H, SO- $CH_3$ ), 7.09 (d,  $J = 4.0$  Hz, 1H,  $C^5$ -H<sub>Pyridine</sub>), 7.21 (t,  $J = 8.1$  Hz, 2H,  $C^3$ -H<sub>4-Fluorophenyl</sub>,  $C^5$ -H<sub>4-Fluorophenyl</sub>), 7.36-7.49 (m, 2H,  $C^2$ -H<sub>4-Fluorophenyl</sub>,  $C^6$ -H<sub>4-Fluorophenyl</sub>), 8.06-8.21 (m, 2H,  $C^6$ -H<sub>Pyridine</sub>,  $C^3$ -H<sub>Pyridine</sub>);  **$^{13}C$ -NMR** (Methanol- $d^4$ , 100 MHz)  $\delta$  = 23.6 (1C, CO- $CH_3$ ), 38.6 (1C, SO- $CH_3$ ), 111.2 (1C,  $C^3$ <sub>Pyridine</sub>), 115.9 (d, 2C,  $^2J(C,F) = 21.1$  Hz,  $C^3$ <sub>4-Fluorophenyl</sub>,  $C^5$ <sub>4-Fluorophenyl</sub>), 117.4 (1C,  $C^5$ <sub>Pyridine</sub>), 130.8 (2C,  $C^2$ <sub>4-Fluorophenyl</sub>,  $C^6$ <sub>4-Fluorophenyl</sub>), 147.6 (1C,  $C^4$ <sub>Pyridine</sub>, quart.), 148.1 (1C,  $C^6$ <sub>Pyridine</sub>), 151.8 (1C,  $C^2$ <sub>Pyridine</sub>, quart.), 162.2 (d, 1C,  $^1J(C,F) = 241.4$  Hz,  $C^4$ <sub>4-Fluorophenyl</sub>-F, quart.), 170.1 (1C, C=O, quart.); **FT-IR** (ATR,  $cm^{-1}$ ): 3201, 3145, 3069, 3037, 3004, 2963, 2924, 2897, 2842, 1690, 1610, 1550, 1531, 1502, 1455, 1434, 1417, 1370, 1286, 1272, 1227, 1183, 1158, 1137, 1124, 1097, 1038, 1009, 997, 979, 961, 946, 885, 835, 816, 744, 720, 704, 685, 669; **HR-MS** calculated for  $C_{17}H_{15}FN_4O_2S$   $m/z = 358.0894$ , measured  $m/z = 358.0901$ .

enantioselective, analytical HPLC:

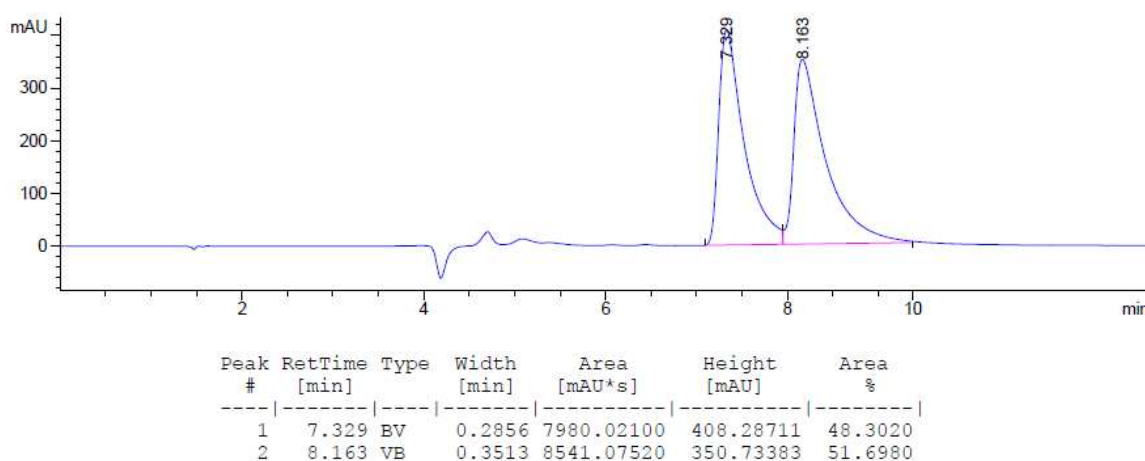

### 3. The Synthesis of Chiral Schiff Base Ligands

**General Procedure C:** The amino alcohol was added to a stirred solution or suspension of the respective salicylaldehyde derivative in ethanol or methanol. The resulting deep-yellow mixture was stirred at room temperature until HPLC analysis indicated complete conversion. The solvent was removed under reduced pressure and the residue was purified by recrystallization from an appropriate solvent or by flash chromatography.

#### (S)-2,4-dibromo-6-((1-hydroxy-3-phenylpropan-2-ylimino)methyl)phenol (S)-12f

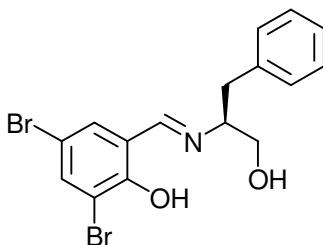

According to the General Procedure C, the title compound (S)-12f was obtained from (S)-11b (0.15 g, 1.0 mmol) and 10b (0.28 g, 1.0 mmol) in 6.0 mL ethanol after stirring for 5 h at room temperature and recrystallization from cyclohexane as a yellow solid (0.21 g, 51.9%).  $[\alpha]_D^{20} = -248.76$  ( $c = 1.007$  in  $\text{CH}_2\text{Cl}_2$ ). **HPLC:**  $t_R = 9.07$  min (94.3% purity, ZORBAX Eclipse XDB-C<sub>8</sub>). **mp** = 111.9 °C. **<sup>1</sup>H-NMR** (200 MHz,  $\text{CDCl}_3$ ):  $\delta$  [ppm] = 2.74-2.94 (m, 1H,  $\text{CH}_2$ -Phenyl), 3.01 (dd,  $J_1 = 13.9$ ,  $J_2 = 4.0$  Hz, 1H,  $\text{CH}_2$ -Phenyl), 3.53-3.78 (m, 2H,  $\text{CHCH}_2\text{OH}$  and  $\text{CH}_2\text{OH}$ ), 3.81-3.99 (m, 1H,  $\text{CH}_2\text{OH}$ ), 7.02-7.19 (m, 3H,  $\text{C}^3\text{-H}_{\text{Benzyl}}$ ,  $\text{C}^4\text{-H}_{\text{Benzyl}}$  and  $\text{C}^5\text{-H}_{\text{Benzyl}}$ ), 7.22-7.36 (m, 3H,  $\text{C}^2\text{-H}_{\text{Benzyl}}$ ,  $\text{C}^6\text{-H}_{\text{Benzyl}}$  and  $\text{C}^5\text{-H}_{\text{Dibromophenol}}$ ), 7.60 (d,  $J = 2.4$  Hz, 1H,  $\text{C}^3\text{-H}_{\text{Dibromophenol}}$ ), 7.86 (s, 1H,  $\text{CH}=\text{N}$ ). **<sup>13</sup>C-NMR** (50 MHz,  $\text{CDCl}_3$ ):  $\delta$  [ppm] = 38.3 (1C,  $\text{CH}_2$ -Phenyl), 65.2 (1C,  $\text{CH}_2\text{OH}$ ), 70.9 (1C,  $\text{CHCH}_2\text{OH}$ ), 107.9 (1C,  $\text{C}^4_{\text{Dibromophenol-Br}}$ , quart.), 113.8 (1C,  $\text{C}^6_{\text{Dibromophenol-Br}}$ , quart.), 118.1 (1C,  $\text{C}^2_{\text{Dibromophenol}}$ , quart.), 126.8 (1C,  $\text{C}^4_{\text{Benzyl}}$ ), 128.6 (2C,  $\text{C}^3_{\text{Benzyl}}$ ,  $\text{C}^5_{\text{Benzyl}}$ ), 129.2 (2C,  $\text{C}^2_{\text{Benzyl}}$ ,  $\text{C}^6_{\text{Benzyl}}$ ), 133.1 (1C,  $\text{C}^1_{\text{Benzyl}}$ , quart.), 136.7 (1C,  $\text{C}^3_{\text{Dibromophenol}}$ ), 138.3 (1C,  $\text{C}^5_{\text{Dibromophenol}}$ ), 161.1 (1C,  $\text{C}^1_{\text{Dibromophenol-OH}}$ , quart.), 164.2 (1C,  $\text{CH}=\text{N}$ ). **FT-IR** (ATR,  $\text{cm}^{-1}$ ): 3254, 3065, 2909, 2162, 1629, 1492, 1454, 1410, 1380,

1341, 1211, 1183, 1139, 1114, 1069, 1043, 1029, 894, 876, 856, 833, 754, 704, 686. **HR-MS** (EI) calculated for  $C_{16}H_{15}Br_2NO_2$   $[M+H]^+$   $m/z = 412.9449$ , measured  $m/z = 412.9446$ .

**(S)-2,4-dibromo-6-((1-hydroxy-4-methylpentan-2-ylimino)methyl)phenol (S)-12g**

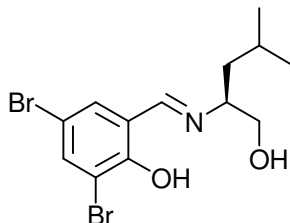

According to the General Procedure C, the title compound **(S)-12g** was obtained from **(S)-11c** (0.12 g, 1.0 mmol) and **10b** (0.28 g, 1.0 mmol) in 6.0 mL ethanol after stirring for 5 h at room temperature and recrystallisation from cyclohexane as a yellow solid (0.29 g, 78.1%).  $[\alpha]_D^{20} = -91.25$  ( $c = 1.042$  in  $CH_2Cl_2$ ). **HPLC**:  $t_R = 9.34$  min (94.1% purity, ZORBAX Eclipse XDB-C<sub>8</sub>). **mp** = 136.7 °C. **<sup>1</sup>H-NMR** (200 MHz,  $CDCl_3$ ):  $\delta$  [ppm] = 0.87 (d,  $J = 6.4$  Hz, 3H,  $CH(CH_3)_2$ ), 0.92 (d,  $J = 6.4$  Hz, 3H,  $CH(CH_3)_2$ ), 1.26-1.45 (m, 1H,  $CH(CH_3)_2$ ), 1.46-1.72 (m, 2H,  $CH_2CH(CH_3)_2$ ), 3.44-3.67 (m, 2H,  $CHCH_2OH$  and  $CH_2OH$ ), 3.70-3.89 (m, 1H,  $CH_2OH$ ), 7.21 (d,  $J = 2.4$  Hz, 1H, C<sup>3</sup>-H<sub>Dibromophenol</sub>), 7.56 (d,  $J = 2.4$  Hz, 1H, C<sup>5</sup>-H<sub>Dibromophenol</sub>), 8.13 (s, 1H,  $CH=N$ ). **<sup>13</sup>C-NMR** (50 MHz,  $CDCl_3$ ):  $\delta$  [ppm] = 21.4, 23.2 (2C,  $CH(CH_3)_2$ ), 24.6 (1C,  $CH(CH_3)_2$ ), 39.9 (1C,  $CH_2CH(CH_3)_2$ ), 65.7 (1C,  $CHCH_2OH$ ), 66.5 (1C,  $CH_2OH$ ), 106.6 (1C, C<sup>4</sup><sub>Dibromophenol</sub>-Br, quart.), 115.1 (1C, C<sup>6</sup><sub>Dibromophenol</sub>-Br, quart.), 117.1 (1C, C<sup>2</sup><sub>Dibromophenol</sub>, quart.), 133.4 (1C, C<sup>3</sup><sub>Dibromophenol</sub>), 138.8 (1C, C<sup>5</sup><sub>Dibromophenol</sub>), 164.2 (1C,  $CH=N$ ). The signal for C<sup>1</sup><sub>Dibromophenol</sub> is not seen in the spectrum. **FT-IR** (ATR,  $cm^{-1}$ ): 3321, 2960, 2932, 2869, 2848, 1632, 1492, 1417, 1382, 1369, 1328, 1213, 1139, 1068, 1018, 955, 899, 856, 832, 756, 690. **HR-MS** (EI) calculated for  $C_{13}H_{17}Br_2NO_2$   $[M+H]^+$   $m/z = 378.9605$ , measured  $m/z = 378.9611$ .

**(S)-2-((1-hydroxy-3-methylbutan-2-ylimino)methyl)-4,6-diiodophenol (S)-12i**

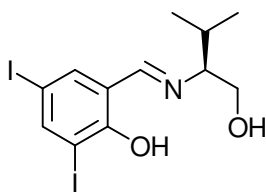

According to the General Procedure C, the title compound **(S)-12i** was obtained from **(S)-11a** (0.10 g, 1.0 mmol) and **10c** (0.37 g, 1.0 mmol) in 6.0 mL ethanol after stirring for 5 h at room temperature and recrystallization from cyclohexane as a deep-yellow solid (0.30 g, 66.0%).  $[\alpha]_D^{20} = -65.01$  ( $c = 1.039$  in  $\text{CH}_2\text{Cl}_2$ ). **HPLC**:  $t_R = 8.51$  min (99.3% purity, Betasil C<sub>8</sub>). **mp** = 133.4 °C. **<sup>1</sup>H-NMR** (200 MHz,  $\text{CDCl}_3$ ):  $\delta$  [ppm] = 0.99 (d,  $J = 6.8$  Hz, 6H,  $\text{CH}(\text{CH}_3)_2$ ), 1.86-2.07 (m, 1H,  $\text{CH}(\text{CH}_3)_2$ ), 3.16-3.31 (m, 1H,  $\text{CHCH}_2\text{OH}$ ), 3.72 (dd,  $J_1 = 11.4$  Hz,  $J_2 = 8.84$  Hz, 1H,  $\text{CH}_2\text{OH}$ ), 3.90 (dd,  $J_1 = 11.1$  Hz,  $J_2 = 3.2$  Hz, 1H,  $\text{CH}_2\text{OH}$ ), 7.47 (d,  $J = 2.2$  Hz, 1H,  $\text{C}^3\text{-H}_{\text{Diiodophenol}}$ ), 7.97 (d,  $J = 2.2$  Hz, 1H,  $\text{C}^5\text{-H}_{\text{Diiodophenol}}$ ), 8.08 (s, 1H,  $\text{CH}=\text{N}$ ). **<sup>13</sup>C-NMR** (50 MHz,  $\text{CDCl}_3$ ):  $\delta$  [ppm] = 18.4, 19.6 (2C,  $\text{CH}(\text{CH}_3)_2$ ), 29.5 (1C,  $\text{CH}(\text{CH}_3)_2$ ), 63.8 (1C,  $\text{CH}_2\text{OH}$ ), 74.0 (1C,  $\text{CHCH}_2\text{OH}$ ), 75.8 (1C,  $\text{C}^4_{\text{Diiodophenol-I}}$ , quart.), 92.8 (1C,  $\text{C}^6_{\text{Diiodophenol-I}}$ , quart.), 116.9 (1C,  $\text{C}^2_{\text{Diiodophenol}}$ , quart.), 141.0 (1C,  $\text{C}^3_{\text{Diiodophenol}}$ ), 149.8 (1C,  $\text{C}^5_{\text{Diiodophenol}}$ ), 164.5 (1C,  $\text{CH}=\text{N}$ ), 166.7 (1C,  $\text{C}^1_{\text{Diiodophenol-OH}}$ , quart.). **FT-IR** (ATR,  $\text{cm}^{-1}$ ): 3283, 2960, 2863, 2161, 1630, 1582, 1506, 1481, 1410, 1372, 1322, 1254, 1213, 1125, 1100, 1065, 1041, 1013, 948, 897, 858, 819, 756, 662. **HR-MS** (EI) calculated for  $\text{C}_{12}\text{H}_{15}\text{I}_2\text{NO}_2$  [ $\text{M}+\text{H}^+$ ]  $m/z = 458.9193$ , measured  $m/z = 458.9207$ .

**(S)-2-((1-hydroxy-3-phenylpropan-2-ylimino)methyl)-4,6-diiodophenol (S)-12j**

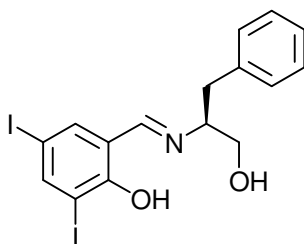

According to the General Procedure C, the title compound **(S)-12j** was obtained from **(S)-11b** (0.15 g, 1.0 mmol) and **10c** (0.37 g, 1.0 mmol) in 6.0 mL ethanol after stirring for 5 h at room temperature and recrystallization from cyclohexane as an orange solid (0.21 g, 42.3%).  $[\alpha]_D^{20} = -226.30$  ( $c = 0.27$  in  $\text{CH}_2\text{Cl}_2$ ). **HPLC**:  $t_R = 9.02$  min (93.5% purity, Betasil C<sub>8</sub>). **mp** = 62-66 °C. **<sup>1</sup>H-NMR** (200 MHz,  $\text{CDCl}_3$ ):  $\delta$  [ppm] = 2.85 (dd,  $J_1 = 13.6$  Hz,  $J_2 = 8.3$  Hz, 1H,  $\text{CH}_2$ -Phenyl), 2.94-3.09 (m, 1H,  $\text{CH}_2$ -Phenyl), 3.52-3.67 (m, 1H,  $\text{CHCH}_2\text{OH}$ ), 3.67-3.80 (m, 1H,  $\text{CH}_2\text{OH}$ ), 3.82-3.96 (m, 1H,  $\text{CH}_2\text{OH}$ ); 7.07-7.16 (m, 2H,  $\text{C}^3$ -H<sub>Benzyl</sub> and  $\text{C}^5$ -H<sub>Benzyl</sub>), 7.17-7.30 (m, 3H,  $\text{C}^2$ -H<sub>Benzyl</sub>,  $\text{C}^4$ -H<sub>Benzyl</sub> and  $\text{C}^6$ -H<sub>Benzyl</sub>), 7.33 (d,  $J = 2.2$  Hz, 1H,  $\text{C}^3$ -H<sub>Diiodophenol</sub>), 7.79 (s, 1H,  $\text{CH}=\text{N}$ ), 7.99 (d,  $J = 2.2$  Hz, 1H,  $\text{C}^5$ -H<sub>Diiodophenol</sub>). **<sup>13</sup>C-NMR** (50 MHz,  $\text{CDCl}_3$ ):  $\delta$  [ppm] = 38.2 (1C,  $\text{CH}_2$ -Ph), 65.1 (1C,  $\text{CH}_2\text{OH}$ ), 70.2 (1C,  $\text{CHCH}_2\text{OH}$ ), 76.9 (1C,  $\text{C}^4$ -Diiodophenol-I, quart.), 91.3 (1C,  $\text{C}^6$ -Diiodophenol-I, quart.), 117.6 (1C,  $\text{C}^2$ -Diiodophenol, quart.), 126.9 (1C,  $\text{C}^4$ -Benzyl), 128.7 (2C,  $\text{C}^3$ -Benzyl,  $\text{C}^5$ -Benzyl), 129.2 (2C,  $\text{C}^2$ -Benzyl,  $\text{C}^6$ -Benzyl); 136.6 (1C,  $\text{C}^1$ -Benzyl, quart.), 140.5 (1C,  $\text{C}^3$ -Diiodophenol), 149.4 (1C,  $\text{C}^5$ -Diiodophenol), 164.1 (1C,  $\text{CH}=\text{N}$ ), 164.8 (1C,  $\text{C}^1$ -Diiodophenol-OH, quart.). **FT-IR** (ATR,  $\text{cm}^{-1}$ ): 3304, 3027, 2921, 2848, 1627, 1583, 1496, 1480, 1436, 1369, 1282, 1218, 1155, 1133, 1031, 901, 861, 748, 699, 658. **HR-MS** (EI) calculated for  $\text{C}_{16}\text{H}_{15}\text{I}_2\text{NO}_2$   $[\text{M}+\text{H}^+]$   $m/z = 506.9193$ , measured  $m/z = 506.9209$ .

**(S)-2-((1-hydroxy-4-methylpentan-2-ylimino)methyl)-4,6-diiodophenol (S)-12k**

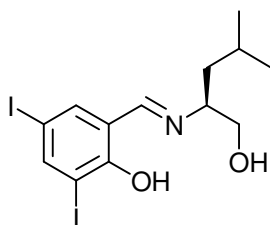

According to the General Procedure C, the title compound **(S)-12k** was obtained from **(S)-11c** (0.12 g, 1.0 mmol) and **10c** (0.37 g, 1.0 mmol) in 6.0 mL ethanol after stirring for 3 h at room temperature and recrystallization from cyclohexane as a yellow solid (0.331 g, 71.4%).  $[\alpha]_D^{20} = -76.82$  ( $c = 1.037$  in  $\text{CH}_2\text{Cl}_2$ ). **HPLC**:  $t_R = 9.29$  min (95.7% purity, Betasil C<sub>8</sub>). **mp** =

159.4 °C. **<sup>1</sup>H-NMR** (200 MHz, CDCl<sub>3</sub>): δ [ppm] = 0.87 (d, *J* = 6.3 Hz, 3H, CH(CH<sub>3</sub>)<sub>2</sub>), 0.91 (d, *J* = 6.3 Hz, 3H, CH(CH<sub>3</sub>)<sub>2</sub>), 1.29-1.45 (m, 1H, CH(CH<sub>3</sub>)<sub>2</sub>), 1.47-1.67 (m, 2H, CH<sub>2</sub>CH(CH<sub>3</sub>)<sub>2</sub>), 3.42-3.68 (m, 2H, CHCH<sub>2</sub>OH, CH<sub>2</sub>OH), 3.73-3.85 (m, 1H, CH<sub>2</sub>OH), 7.47 (d, *J* = 2.2 Hz, 1H, C<sup>3</sup>-H<sub>Diiiodophenol</sub>), 7.97 (d, *J* = 2.2 Hz, 1H, C<sup>5</sup>-H<sub>Diiiodophenol</sub>), 8.09 (s, 1H, CH=N). **<sup>13</sup>C-NMR** (50 MHz, CDCl<sub>3</sub>): δ [ppm] = 21.4, 23.2 (2C, CH(CH<sub>3</sub>)<sub>2</sub>), 24.6 (1C, CH(CH<sub>3</sub>)<sub>2</sub>), 39.9 (1C, CH<sub>2</sub>CH(CH<sub>3</sub>)<sub>2</sub>), 65.8 (1C, CHCH<sub>2</sub>OH), 66.4 (1C, CH<sub>2</sub>OH), 76.1 (1C, C<sup>4</sup><sub>Diiiodophenol</sub>-I, quart.), 92.3 (1C, C<sup>6</sup><sub>Diiiodophenol</sub>-I, quart.), 117.2 (1C, C<sup>2</sup><sub>Diiiodophenol</sub>, quart.), 140.8 (1C, C<sup>3</sup><sub>Diiiodophenol</sub>), 149.7 (1C, C<sup>5</sup><sub>Diiiodophenol</sub>), 164.0 (1C, CH=N), 166.0 (1C, C<sup>1</sup><sub>Diiiodophenol</sub>-OH, quart.). **FT-IR** (ATR, cm<sup>-1</sup>): 3255, 2916, 2849, 2161, 1634, 1509, 1481, 1411, 1368, 1218, 1134, 1065, 954, 896, 855, 756, 718, 661. **HR-MS** (EI) calculated for C<sub>13</sub>H<sub>17</sub>I<sub>2</sub>NO<sub>2</sub> [M+H<sup>+</sup>] *m/z* = 472.9349, measured *m/z* = 472.9352.

**(*R*)-2-((1-hydroxy-3,3-dimethylbutan-2-ylimino)methyl)-4,6-diiodophenol (*R*)-12l**

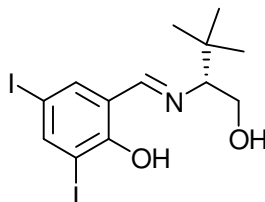

According to the General Procedure C, the title compound (***R***)-12l was obtained from (***R***)-11d (0.10 g, 0.86 mmol) and **10c** (0.32 g, 0.86 mmol) in 6.0 mL methanol after stirring for 3 h at room temperature and without further purification as a yellow solid (0.28 g, 70.6%). [ $\alpha$ ]<sub>D</sub><sup>20</sup> = +13.68 (*c* = 1.045 in acetone). **HPLC**: *t<sub>R</sub>* = 9.59 min (97.7% purity, ZORBAX Eclipse XDB-C<sub>8</sub>). **mp** = 159.5 °C. **<sup>1</sup>H-NMR** (200 MHz, CDCl<sub>3</sub>): δ [ppm] = 0.99 (s, 9H, C(CH<sub>3</sub>)<sub>3</sub>), 3.05-3.19 (m, 1H, CHC(CH<sub>3</sub>)<sub>3</sub>), 3.55-3.73 (m, 1H, CH<sub>2</sub>OH), 3.92-4.07 (m, 1H, CH<sub>2</sub>OH), 7.42 (d, *J* = 2.0 Hz, 1H, C<sup>3</sup>-H<sub>Diiiodophenol</sub>), 7.90 (d, *J* = 2.2 Hz, 1H, C<sup>5</sup>-H<sub>Diiiodophenol</sub>), 8.02 (s, 1H, CH=N), 14.75 (brs, 1H, OH). **<sup>13</sup>C-NMR** (50 MHz, CDCl<sub>3</sub>): δ [ppm] = 26.8 (3C, C(CH<sub>3</sub>)<sub>3</sub>), 32.8 (1C, C(CH<sub>3</sub>)<sub>3</sub>), 61.8 (1C, CH<sub>2</sub>OH), 75.8 (1C, CHC(CH<sub>3</sub>)<sub>3</sub>), 78.1 (1C, C<sup>4</sup><sub>Diiiodophenol</sub>-I, quart.), 92.5

(1C, C<sup>6</sup><sub>Diiiodophenol-I</sub>, quart.), 116.9 (1C, C<sup>2</sup><sub>Diiiodophenol</sub>, quart.), 141.0 (1C, C<sup>3</sup><sub>Diiiodophenol</sub>), 149.8 (1C, C<sup>5</sup><sub>Diiiodophenol</sub>), 164.5 (1C, CH=N), 166.5 (1C, C<sup>1</sup><sub>Diiiodophenol-OH</sub>, quart.). **FT-IR** (ATR, cm<sup>-1</sup>): 3305, 2966, 2871, 1635, 1583, 1508, 1478, 1422, 1383, 1364, 1335, 1249, 1215, 1130, 1058, 1013, 946, 900, 857, 820, 787, 755, 663. **HR-MS** (ESI) calculated for C<sub>13</sub>H<sub>17</sub>I<sub>2</sub>NO<sub>2</sub> [M+Na<sup>+</sup>] m/z = 495.9241, measured m/z = 495.9245.

#### 4. Asymmetric Oxidation of Tri- and Tetrasubstituted 2-Thioimidazoles with Ti(O-*i*Pr)<sub>4</sub>, D-DET or L-DET and CHP

**General Procedure D:** Ti(O-*i*Pr)<sub>4</sub> (1.0- 2.0 eq.) was added rapidly to a solution of D-DET or L-DET (2.0- 4.0 eq.) in 10.0 mL dichloromethane at room temperature. After 2.5 min, water (1.0 eq.) was added slowly. The resulting mixture was stirred initially for 20 min at room temperature, followed by cooling to T= -18 °C for further 20 min. After addition of the respective 2-thioimidazole **8a-d**, **8f** (1.0 eq.) and CHP (2.0- 4.0 eq.), the resulting mixture was stirred at T = -18°C, until HPLC analysis (Thermo C<sub>8</sub> Betasil, MeOH/0.01 M KH<sub>2</sub>PO<sub>4</sub>, pH = 2.3) indicated complete conversion. The mixture was combined with water and extracted with dichloromethane. The organic layer was washed with brine and H<sub>2</sub>O, dried over Na<sub>2</sub>SO<sub>4</sub>, and the solvent was removed under reduced pressure. The crude product was purified by flash chromatography on silica gel to yield the pure sulfoxide. The enantiomer ratio of the sulfoxides **9a-d**, **9f** was determined by enantioselective, analytical HPLC (Daicel CHIRALPAK IA, 4.6 x 250 mm, 5 μm, CH<sub>2</sub>Cl<sub>2</sub>/MeOH/TEA 98: 2: 0.1, λ = 254 nm, 0.8 mL/min flow rate).



**Table S1.** The Enantioselective Sulfoxidation of the 2-Thioimidazoles Using the System Ti(O-*i*Pr)<sub>4</sub>/D-DET or L-DET/H<sub>2</sub>O/CHP

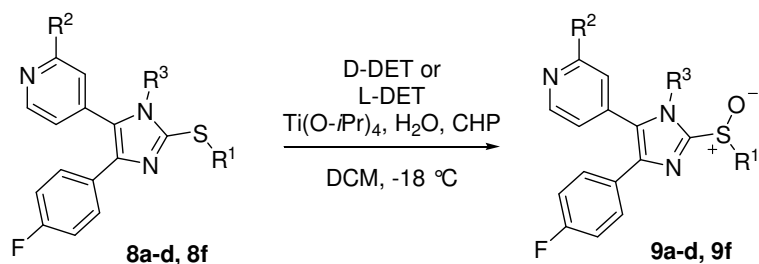

| Entry | Sulfide   | Ligand | Conditions <sup>[a]</sup> | Conversion [%] | Enantio ratio E <sub>1</sub> : E <sub>2</sub> [%] <sup>[c]</sup> | ee [%]    |
|-------|-----------|--------|---------------------------|----------------|------------------------------------------------------------------|-----------|
| 1     | <b>8a</b> | D-DET  | A (24) <sup>[b]</sup>     | 74             | 27.1 : 72.9                                                      | 46        |
| 2     | <b>8a</b> | D-DET  | B (19) <sup>[b]</sup>     | 84             | 12.2 : 87.8                                                      | 76        |
| 3     | <b>8b</b> | D-DET  | A (2) <sup>[b]</sup>      | 64             | 40.0 : 60.0                                                      | 20        |
| 4     | <b>8c</b> | D-DET  | B (19) <sup>[b]</sup>     | 46             | 60.2 : 39.8                                                      | 20        |
| 5     | <b>8d</b> | D-DET  | A (3) <sup>[b]</sup>      | 40             | 53.3 : 46.7                                                      | 7         |
| 6     | <b>8f</b> | D-DET  | C (4) <sup>[b]</sup>      | 70             | 34.6 : 65.4                                                      | 31        |
| 7     | <b>8a</b> | L-DET  | A (24) <sup>[b]</sup>     | 78             | 87.8 : 12.2                                                      | 76        |
| 8     | <b>8a</b> | L-DET  | B (19) <sup>[b]</sup>     | 76             | 92.6 : 7.4                                                       | <b>85</b> |
| 9     | <b>8b</b> | L-DET  | A (2) <sup>[b]</sup>      | 80             | 65.6 : 34.4                                                      | 31        |
| 10    | <b>8c</b> | L-DET  | B (19) <sup>[b]</sup>     | 53             | 17.5 : 82.5                                                      | 65        |
| 11    | <b>8d</b> | L-DET  | A (3) <sup>[b]</sup>      | 32             | 45.5 : 54.5                                                      | 9         |
| 12    | <b>8f</b> | L-DET  | A (3) <sup>[b]</sup>      | 77             | 70.3 : 29.7                                                      | 41        |

<sup>[a]</sup>Conditions: A: Ti(O-*i*Pr)<sub>4</sub>/D-DET or L-DET/H<sub>2</sub>O/CHP 1: 2: 1: 2, CH<sub>2</sub>Cl<sub>2</sub>, -18 °C. B: Ti(O-*i*Pr)<sub>4</sub>/D-DET or L-DET/H<sub>2</sub>O/CHP 2: 4: 1: 4, CH<sub>2</sub>Cl<sub>2</sub>, -18 °C. C: Ti(O-*i*Pr)<sub>4</sub>/D-DET/H<sub>2</sub>O/CHP 1.5: 3: 1: 3, CH<sub>2</sub>Cl<sub>2</sub>, -18 °C. <sup>[b]</sup>Reaction time in (h). <sup>[c]</sup>Determined by enantioselective analytical HPLC using a Daicel CHIRALPAK IA column.

**Table S1, entry 1:**

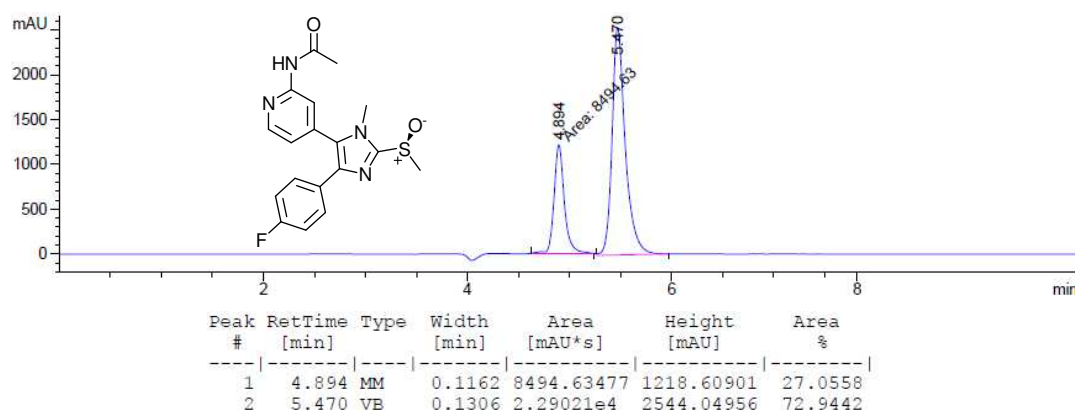

**Table S1, entry 2: (S)-9a**

$[\alpha]_D^{20} = +17.66$  ( $c = 0.440$  in Methanol)

**HPLC:**  $t_R = 4.73$  min, purity: 98.8% ( $\lambda = 254$  nm),  $t_R = 4.73$  min, purity: 98.4% ( $\lambda = 230$  nm).

enantioselective analytical HPLC:

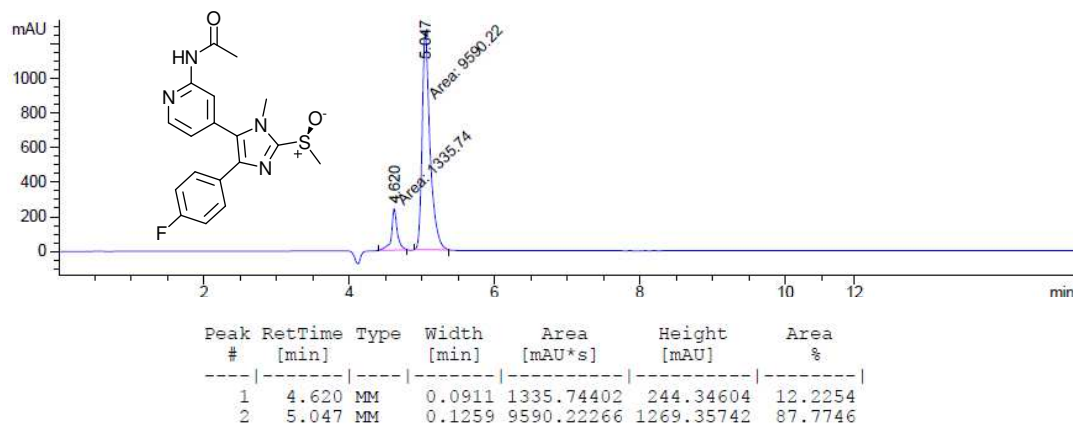

**Table S1, entry 3:**

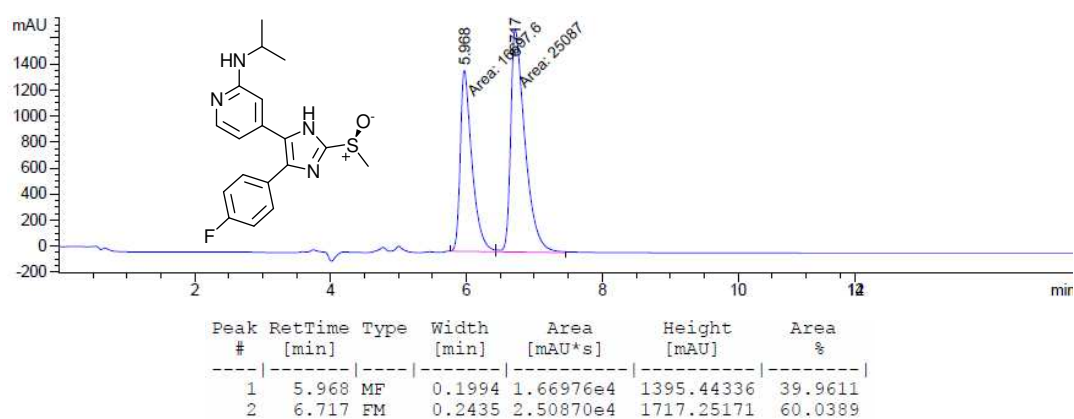

**Table S1, entry 4: (R)-9c**

$[\alpha]_D^{20} = +21.82$  ( $c = 0.152$  in Methanol)

**HPLC:**  $t_R = 6.10$  min, purity: 98.8% ( $\lambda = 254$  nm),  $t_R = 6.10$  min, purity: 99.7% ( $\lambda = 230$  nm)

enantioselective analytical HPLC:

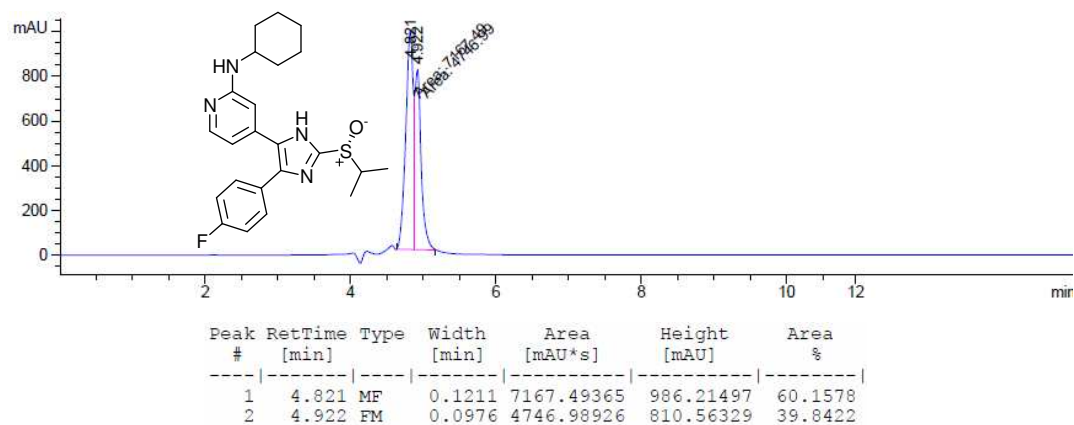

**Table S1, entry 5:**

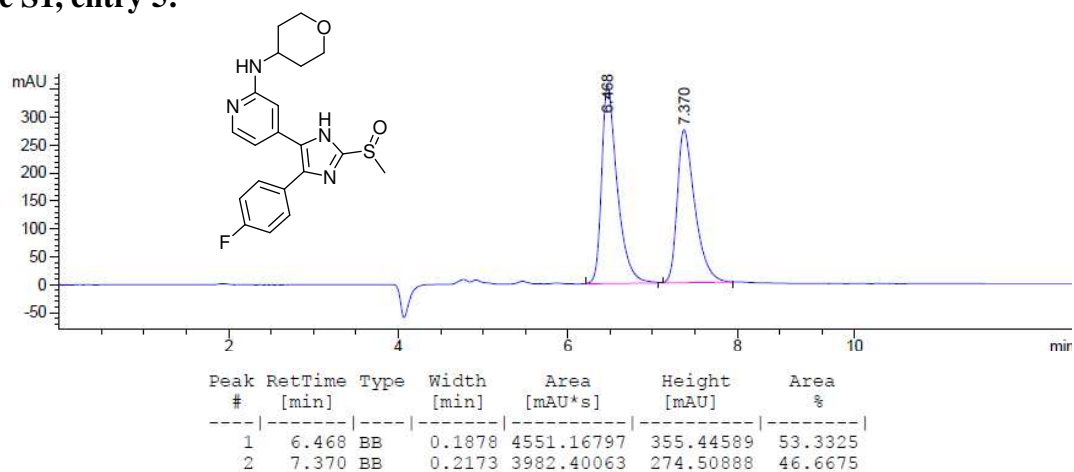

**Table S1, entry 6:**

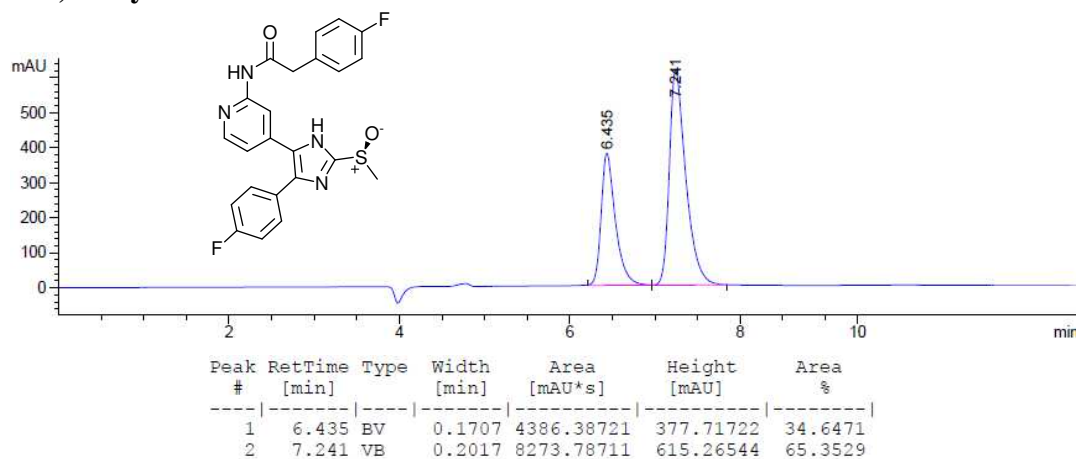

**Table S1, entry 7:**

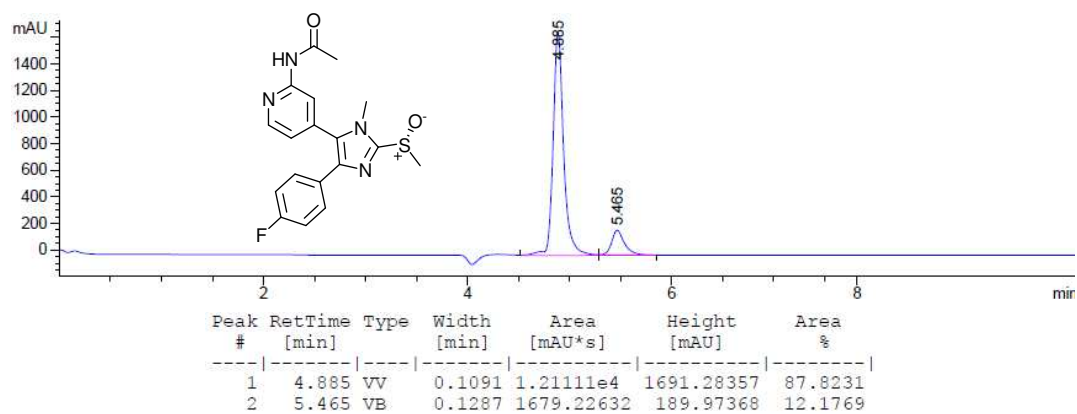

**Table S1, entry 8: (R)-9a**

$[\alpha]_D^{20} = -24.62$  ( $c = 0.415$  in Methanol)

**HPLC:**  $t_R = 4.73$  min, purity: 99.3% ( $\lambda = 254$  nm),  $t_R = 4.73$  min, purity: 99.4% ( $\lambda = 230$  nm).

# enantioselective analytical HPLC

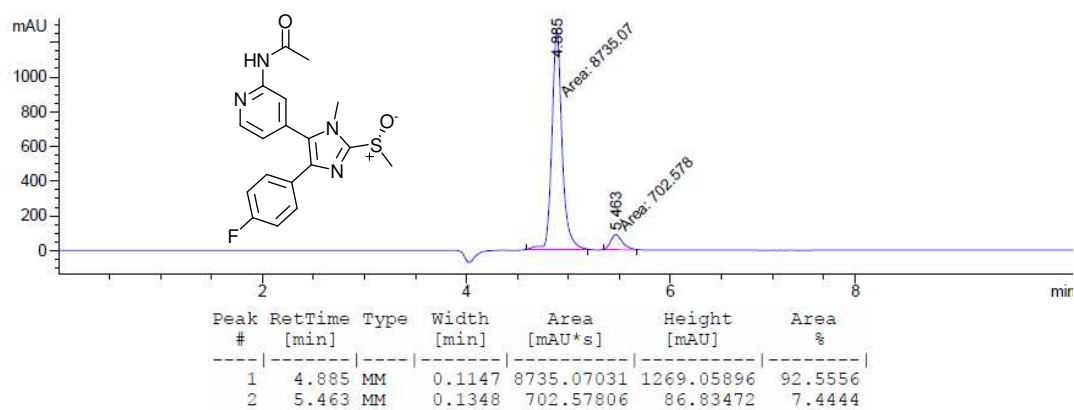

Table S1, entry 9:

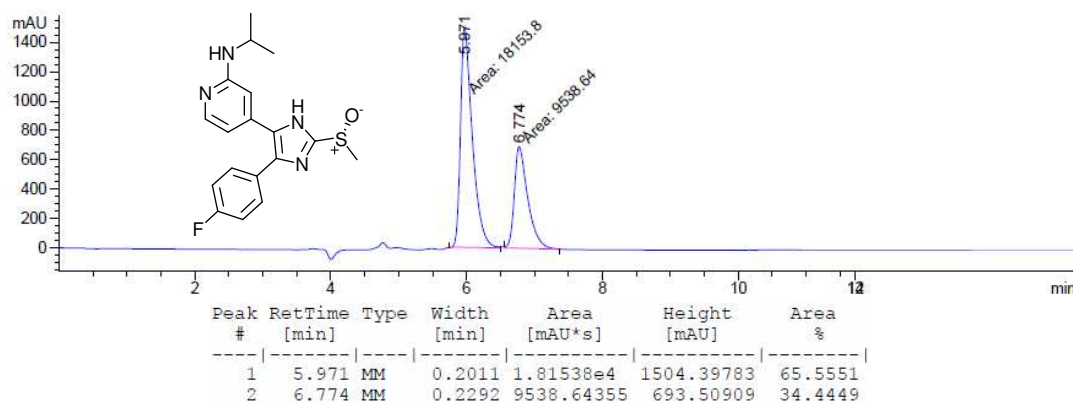

Table S1, entry 10:

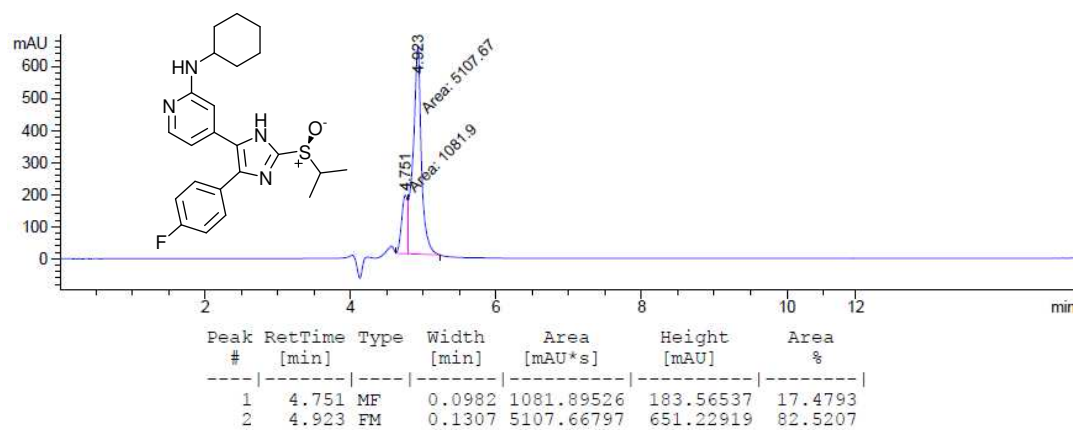

**Table S1, entry 11:**

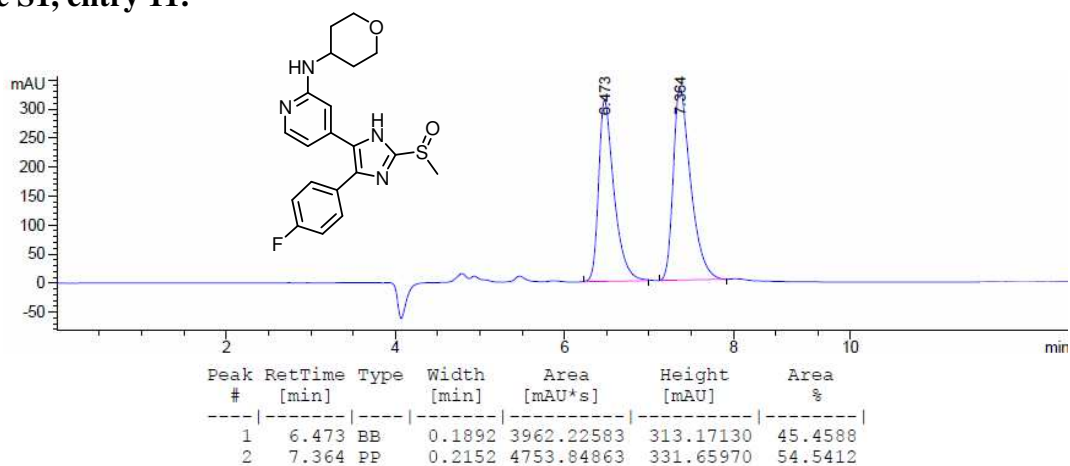

**Table S1, entry 12:**

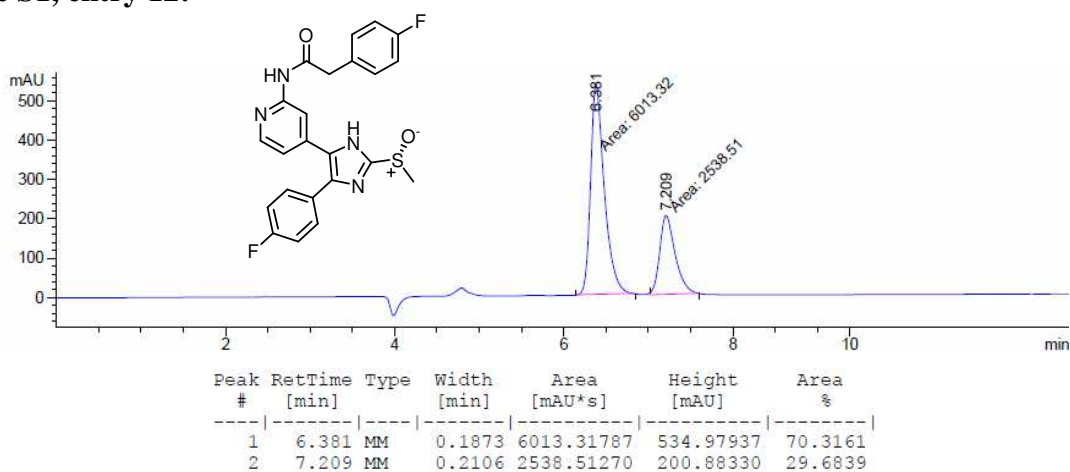

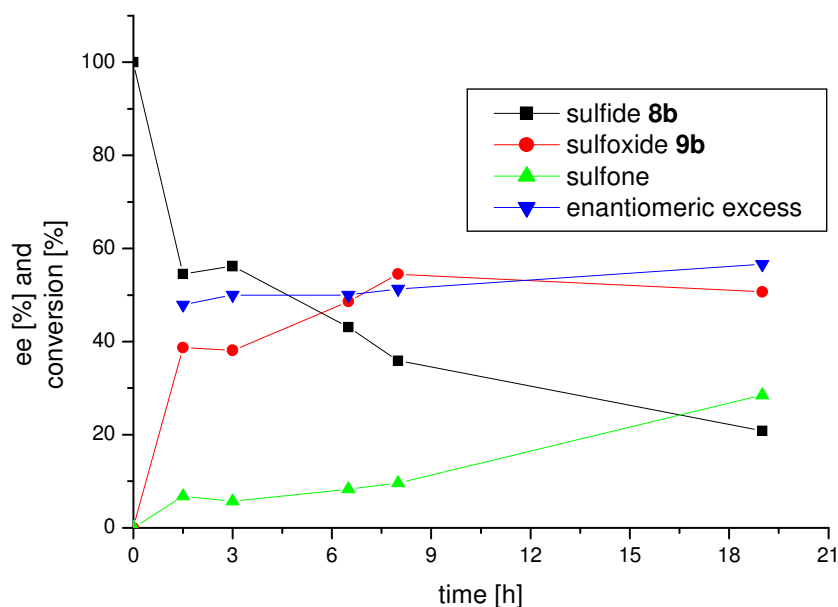

**Figure S1.** Time profile of the enantioselectivity (%ee of sulfoxide **9b**) and conversions (%) in the oxidation of the sulfide **8b** using the catalyst system  $\text{Ti}(\text{O-}i\text{Pr})_4$  (0.3 eq)/D-DET (0.6 eq)/ $\text{H}_2\text{O}$  (0.2 eq)/ $i\text{Pr}_2\text{NEt}$  (0.3 eq)/CHP (1.0 eq).

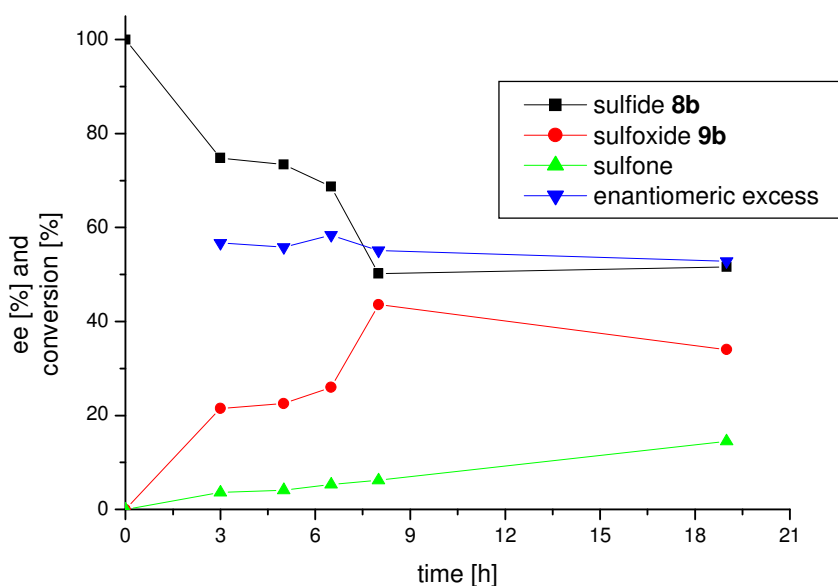

**Figure S2.** Time profile of the enantioselectivity (%ee of sulfoxide **9b**) and conversions (%) in the oxidation of the sulfide **8b** using the catalyst system  $\text{Ti}(\text{O-}i\text{Pr})_4$  (0.3 eq)/L-DET (0.6 eq)/ $\text{H}_2\text{O}$  (0.2 eq)/ $i\text{Pr}_2\text{NEt}$  (0.3 eq)/CHP (1.0 eq).

## 5. Asymmetric Oxidation of Tri- and Tetrasubstituted 2-Thioimidazoles with Fe(acac)<sub>3</sub>, H<sub>2</sub>O<sub>2</sub> and chiral Schiff bases (*S*)-12d, (*S*)-12h, (*S*)-12l and (*R*)-12l.

**General procedure E:** Fe(acac)<sub>3</sub> (0.02- 0.2 eq) and the specific chiral Schiff base (*S*)-12d, (*S*)-12h, (*S*)-12l or (*R*)-12l (0.04- 0.4 eq.) were dissolved in 4.0 mL dichloromethane. After stirring at room temperature for 1 h, the resulting solution was added to a suspension of 4-methoxybenzoic acid (0.01- 0.2 eq.) in 1.0 mL dichloromethane. The mixture was stirred for 10 min, followed by the addition of the respective 2-thioimidazole **8a-d** (1.0 eq.). The solution was then treated with 32 % aqueous H<sub>2</sub>O<sub>2</sub> (1.2- 2.0 eq.) and was stirred at room temperature; until HPLC analysis indicate complete conversion. The mixture was combined with water and extracted with dichloromethane. The organic extract was washed with brine and water, and dried over Na<sub>2</sub>SO<sub>4</sub>. After rotary evaporation, the crude product was purified by flash chromatography on silica gel to obtain the pure sulfoxide. The enantiomer ratio of the sulfoxides **9a-d** was determined by enantioselective, analytical HPLC (Daicel CHIRALPAK IA, 4.6 x 250 mm, 5 μm, 0.8 ml/min, CH<sub>2</sub>Cl<sub>2</sub>/MeOH/TEA 98: 2: 0.1, λ = 254 nm, 0.8 mL/min flow rate).



**Table S2.** The Catalytic Enantioselective Oxidation of the Selected 2-Thioimidazoles with Fe(acac)<sub>3</sub>, H<sub>2</sub>O<sub>2</sub> and Different Chiral Schiff Bases (**S**)-**12d**, (**S**)-**12h**, (**S**)-**12l** and (**R**)-**12l**.

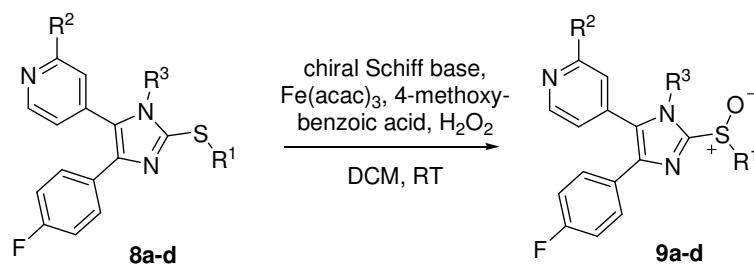

| Entry | Sulfide   | Ligand                   | Conditions <sup>[a]</sup> | Conversion [%] | Enantio ratio E <sub>1</sub> : E <sub>2</sub> [%] <sup>[c]</sup> | ee [%]    |
|-------|-----------|--------------------------|---------------------------|----------------|------------------------------------------------------------------|-----------|
| 1     | <b>8a</b> | ( <b>S</b> )- <b>12l</b> | A (18) <sup>[b]</sup>     | 43             | 17.0 : 83.0                                                      | 66        |
| 2     | <b>8a</b> | ( <b>S</b> )- <b>12l</b> | B (23) <sup>[b]</sup>     | 52             | 17.8 : 82.2                                                      | 64        |
| 3     | <b>8a</b> | ( <b>S</b> )- <b>12l</b> | C (23) <sup>[b]</sup>     | 48             | 29.4 : 70.6                                                      | 41        |
| 4     | <b>8a</b> | ( <b>S</b> )- <b>12h</b> | D (19) <sup>[b]</sup>     | 17             | 39.0 : 61.0                                                      | 22        |
| 5     | <b>8a</b> | ( <b>S</b> )- <b>12d</b> | D (22) <sup>[b]</sup>     | 34             | 29.4 : 70.6                                                      | 41        |
| 6     | <b>8b</b> | ( <b>S</b> )- <b>12l</b> | E (22) <sup>[b]</sup>     | 65             | 6.8 : 93.2                                                       | 86        |
| 7     | <b>8b</b> | ( <b>S</b> )- <b>12h</b> | E (19) <sup>[b]</sup>     | 73             | 5.8 : 94.2                                                       | 88        |
| 8     | <b>8b</b> | ( <b>S</b> )- <b>12d</b> | E (19) <sup>[b]</sup>     | 54             | 24.3 : 75.7                                                      | 51        |
| 9     | <b>8c</b> | ( <b>S</b> )- <b>12l</b> | E (18) <sup>[b]</sup>     | 33             | 3.4 : 96.6                                                       | <b>93</b> |
| 10    | <b>8c</b> | ( <b>S</b> )- <b>12h</b> | E (22) <sup>[b]</sup>     | 45             | 2.7 : 97.3                                                       | <b>95</b> |
| 11    | <b>8c</b> | ( <b>S</b> )- <b>12d</b> | E (18) <sup>[b]</sup>     | 35             | 18.3 : 81.7                                                      | 63        |
| 12    | <b>8d</b> | ( <b>S</b> )- <b>12l</b> | E (20) <sup>[b]</sup>     | 38             | 13.6 : 86.4                                                      | 73        |
| 13    | <b>8d</b> | ( <b>S</b> )- <b>12h</b> | E (20) <sup>[b]</sup>     | 39             | 2.2 : 97.8                                                       | <b>96</b> |
| 14    | <b>8d</b> | ( <b>S</b> )- <b>12d</b> | E (19) <sup>[b]</sup>     | 31             | 11.9 : 88.1                                                      | 76        |
| 15    | <b>8a</b> | ( <b>R</b> )- <b>12l</b> | D (24) <sup>[b]</sup>     | 46             | 80.0 : 20.0                                                      | 60        |

<sup>[a]</sup>Conditions: A: Fe(acac)<sub>3</sub> (0.02 eq)/ligand (0.04 eq)/4-methoxybenzoic acid (0.01 eq)/H<sub>2</sub>O<sub>2</sub> (1.2 eq), CH<sub>2</sub>Cl<sub>2</sub>, RT. B: Fe(acac)<sub>3</sub> (0.04 eq)/ligand (0.08 eq)/4-methoxybenzoic acid (0.02 eq)/H<sub>2</sub>O<sub>2</sub> (1.6 eq), CH<sub>2</sub>Cl<sub>2</sub>, RT. C: Fe(acac)<sub>3</sub> (0.08 eq)/ligand (0.16 eq)/4-methoxybenzoic acid (0.02 eq)/H<sub>2</sub>O<sub>2</sub> (2.0 eq), CH<sub>2</sub>Cl<sub>2</sub>, RT. D: Fe(acac)<sub>3</sub> (0.02 eq)/ligand (0.04 eq)/4-methoxybenzoic acid (0.02 eq)/H<sub>2</sub>O<sub>2</sub> (1.2 eq), CH<sub>2</sub>Cl<sub>2</sub>, RT. E: Fe(acac)<sub>3</sub> (0.2 eq)/ligand (0.4 eq)/4-methoxybenzoic acid (0.2 eq)/H<sub>2</sub>O<sub>2</sub> (1.2 eq), CH<sub>2</sub>Cl<sub>2</sub>, RT. <sup>[b]</sup>Reaction time in (h). <sup>[c]</sup>Determined by enantioselective analytical HPLC using a Daicel CHIRALPAK IA column.

**Table S2, entry 1:**

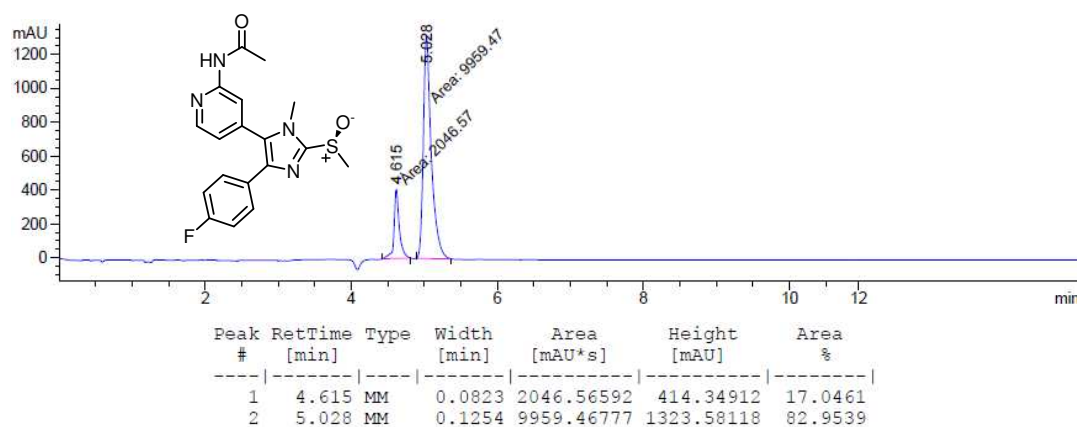

**Table S2, entry 2:**

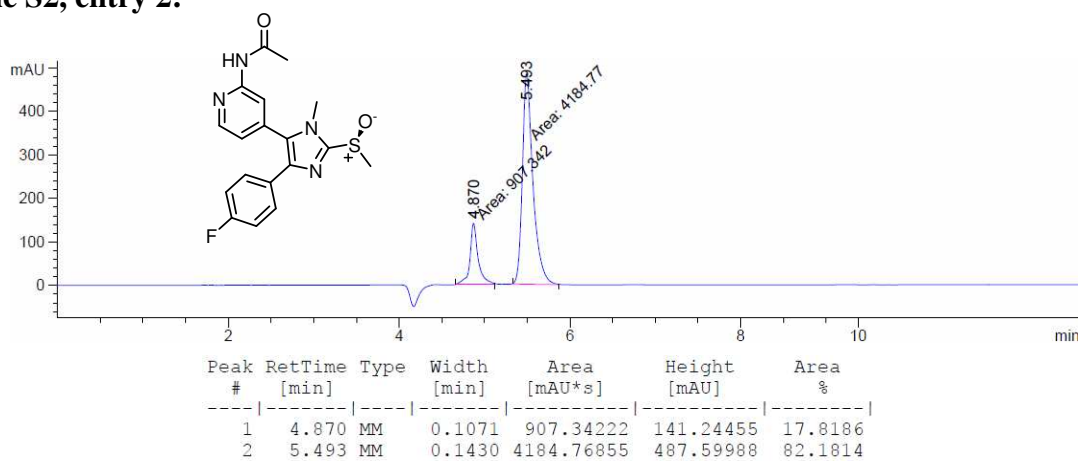

**Table S2, entry 3:**

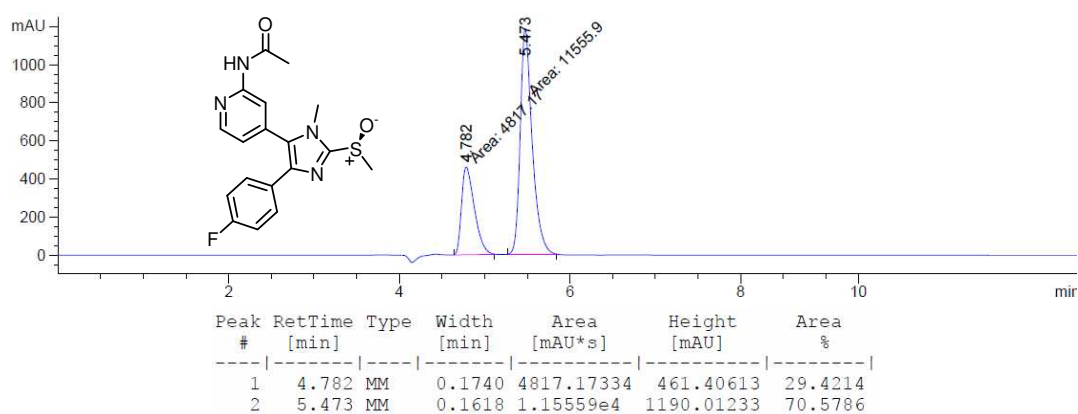

**Table S2, entry 4:**

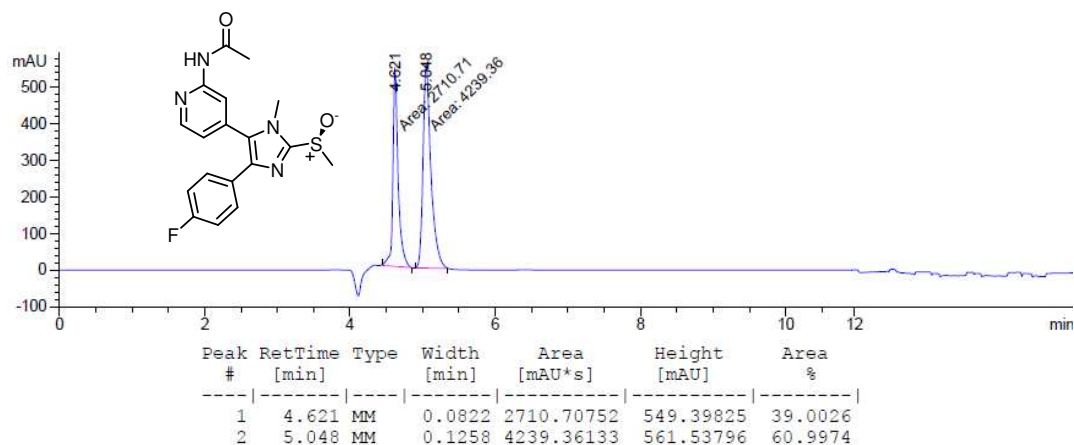

**Table S2, entry 5:**

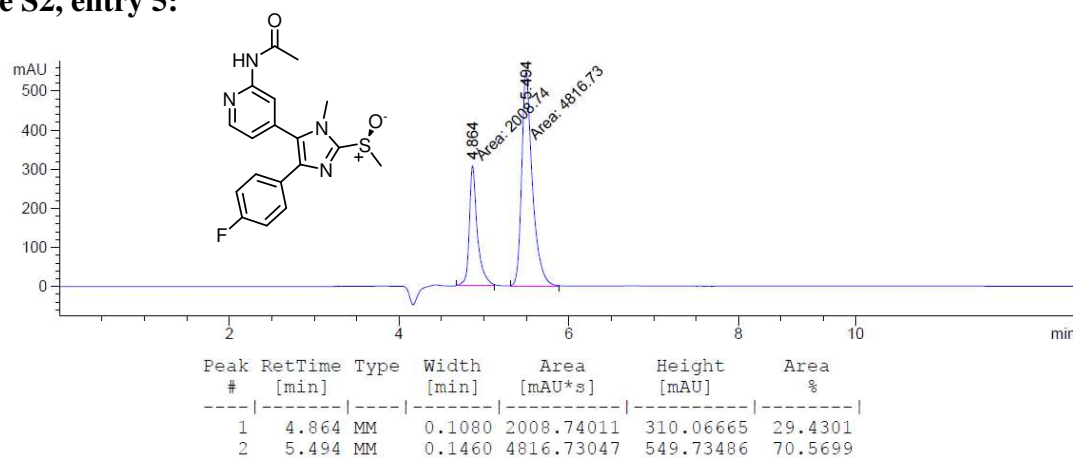

**Table S2, entry 6:**

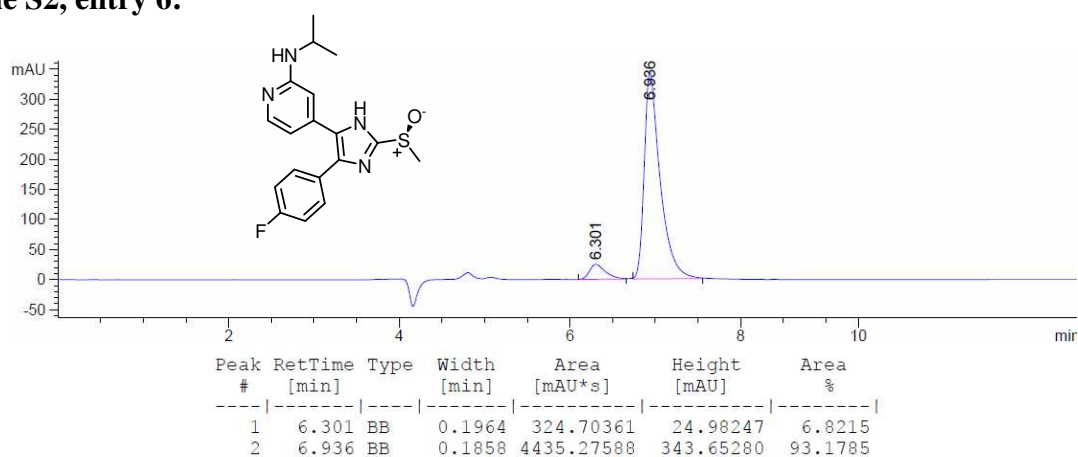

**Table S2, entry 7:**

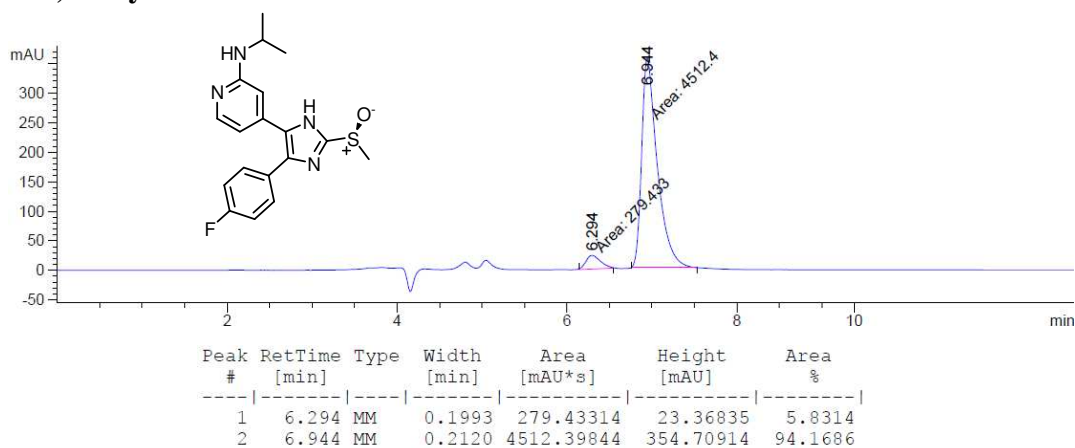

**Table S2, entry 8:**

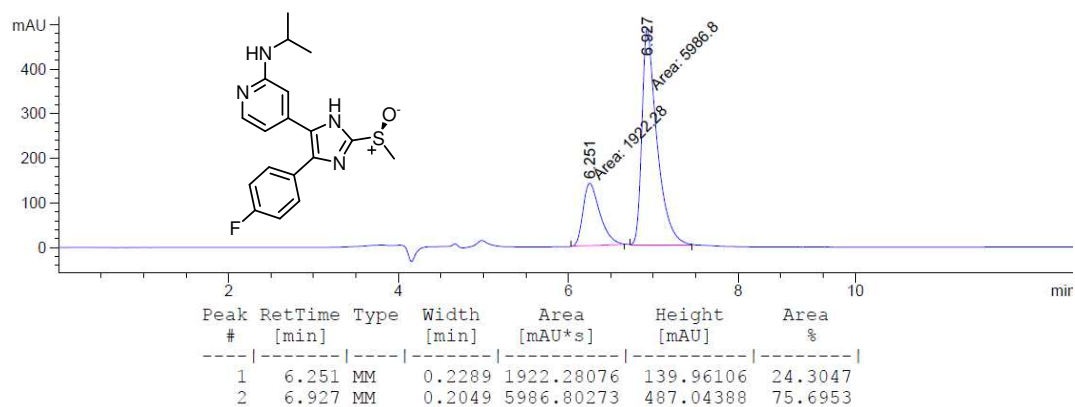

**Table S2, entry 9:**

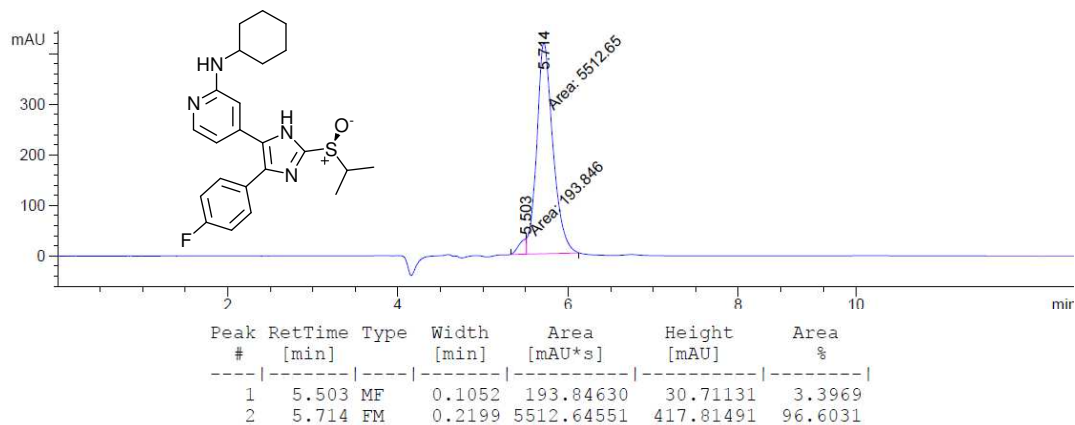

**Table S2, entry 10: (S)-9c**

$[\alpha]_D^{20} = -43.33$  ( $c = 0.150$  in Methanol)

**HPLC:**  $t_R = 6.09$  min, purity: 98.7% ( $\lambda = 254$  nm),  $t_R = 6.09$  min, purity: 99.0% ( $\lambda = 230$  nm)

enantioselective analytical HPLC:

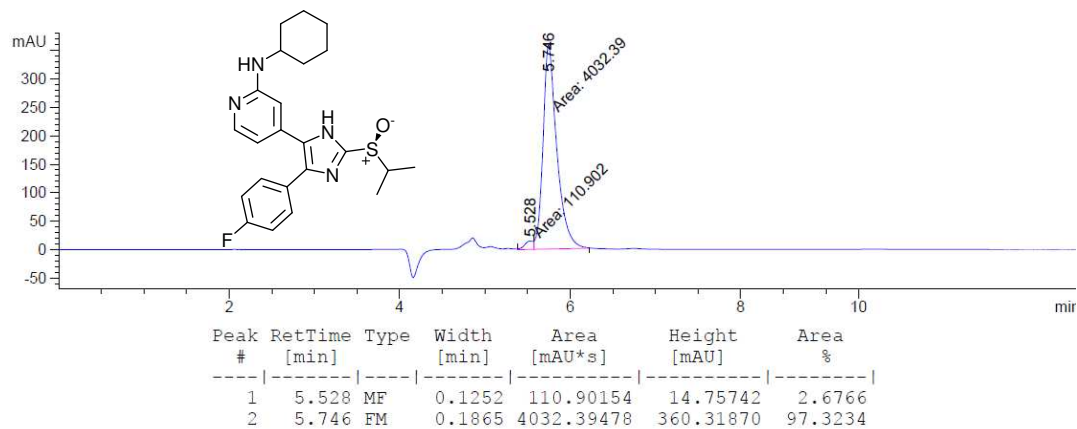**Table S2, entry 11:**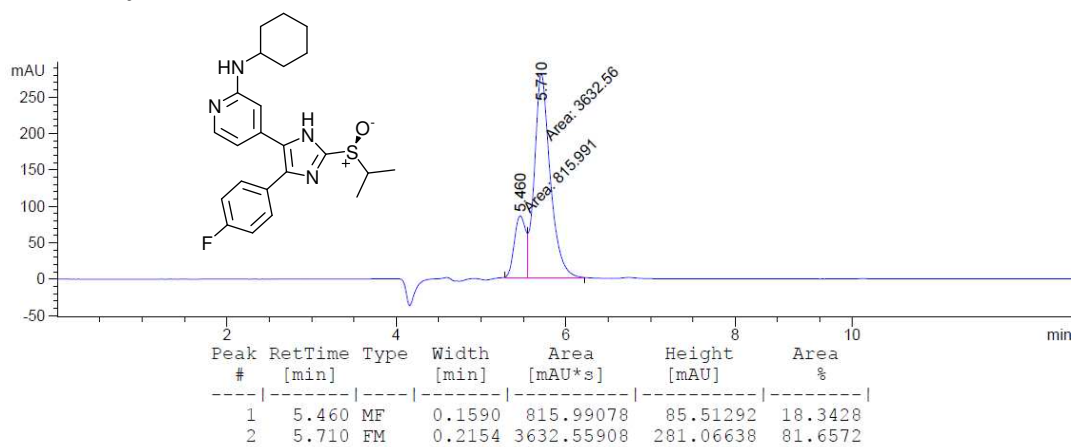

Table S2, entry 12:

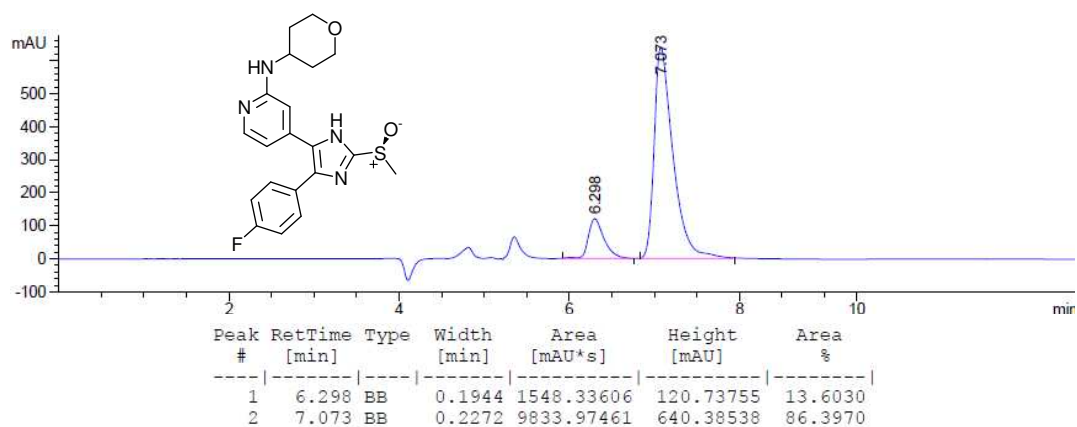

Table S2, entry 13:

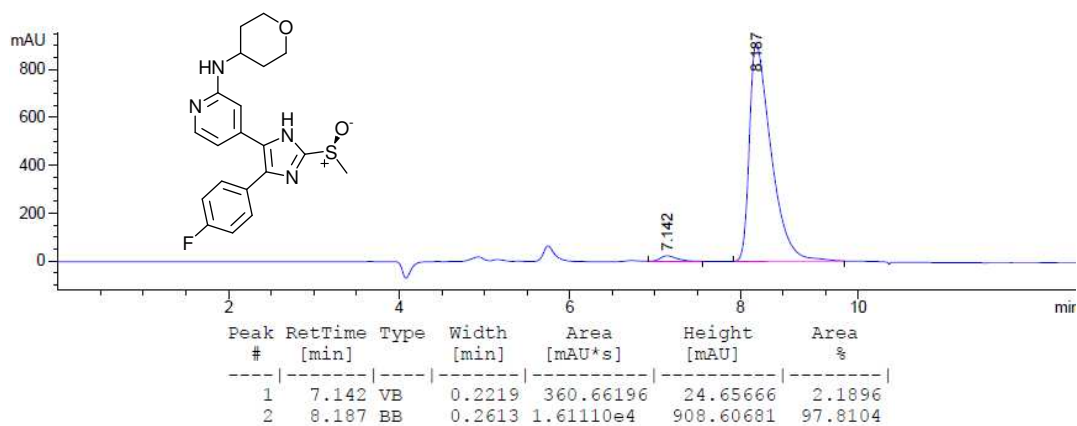

Table S2, entry 14:

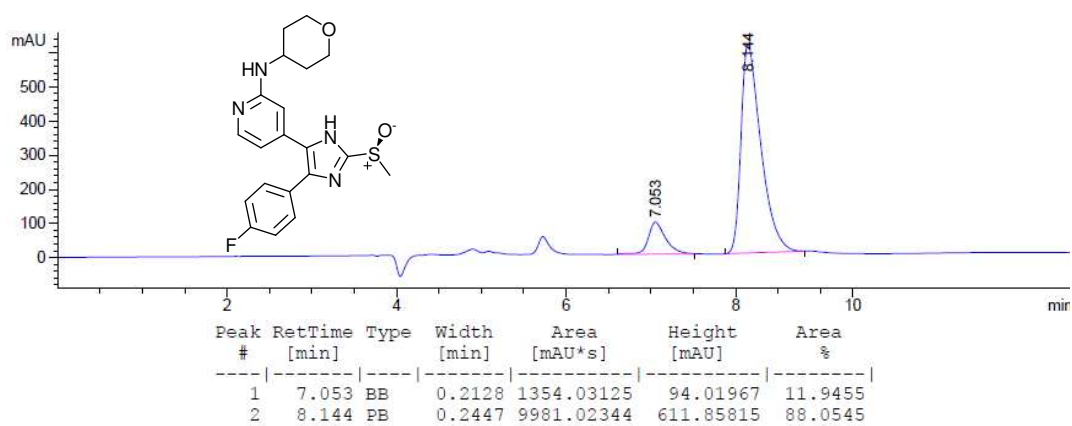

**Table S2, entry 15:**

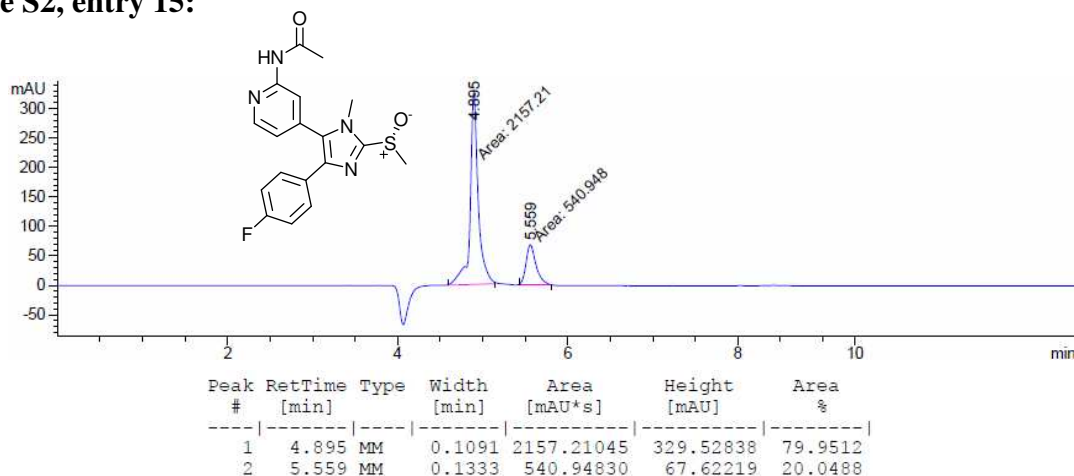

## 6. Asymmetric Oxidation of Tri- and Tetrasubstituted 2-Thioimidazoles with $\text{Ti}(\text{O-}i\text{Pr})_4$ , (*S*)-BINOL and TBHP.

**General Procedure F:**  $\text{Ti}(\text{O-}i\text{Pr})_4$  (0.1 eq.) was added dropwise to a solution of (*S*)-BINOL (0.2 eq.) in 6.0 mL dichloromethane. After stirring for 20 min at room temperature, water (0.2 eq.) and the specific 2-thioimidazole **8a-b**, **8d-l** (1.0 eq.) were added. The resulting mixture was stirred initially at room temperature for 30 min and was then cooled to  $T = 5\text{ }^\circ\text{C}$  (or room temperature for compound **8e**) for 20 min, followed by the dropwise addition of TBHP (70 % in water, 2.0 eq.). The progress of the reaction was monitored until HPLC analysis indicated complete conversion. After reaction completion, the reaction mixture was allowed to warm to room temperature and was stirred for another 45 min before being diluted with  $\text{CH}_2\text{Cl}_2$  and dried over  $\text{Na}_2\text{SO}_4$ . After filtration and evaporation of the solvent, the crude product was purified by flash chromatography on silica gel to yield the pure sulfoxide. The enantiomer ratio of the sulfoxides **9a-b**, **9d-l** was determined by enantioselective, analytical HPLC (Daicel CHIRALPAK IA, 4.6 x 250 mm, 5  $\mu\text{m}$ , 0.8 mL/min,  $\text{CH}_2\text{Cl}_2/\text{MeOH}/\text{TEA}$  98: 2: 0.1,  $\lambda = 254\text{ nm}$ , 0.8 mL/min flow rate).

**Table S3.** Asymmetric Oxidation of the 2-Thioimidazoles with the System Ti(O-*i*Pr)<sub>4</sub>/*S*-BINOL/H<sub>2</sub>O/TBHP.

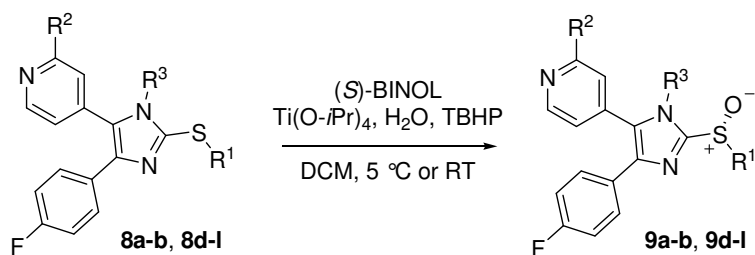

| Entry | Sulfide   | Cond. <sup>[a]</sup>  | Conversion [%] | Enantio ratio E <sub>1</sub> : E <sub>2</sub> [%] <sup>[c]</sup> | ee [%]    | Config.      |
|-------|-----------|-----------------------|----------------|------------------------------------------------------------------|-----------|--------------|
| 1     | <b>8a</b> | A (22) <sup>[b]</sup> | 74             | 75.3 : 24.7                                                      | 51        | ( <i>R</i> ) |
| 2     | <b>8b</b> | A (3) <sup>[b]</sup>  | 97             | 99.3 : 0.7                                                       | <b>99</b> | ( <i>R</i> ) |
| 3     | <b>8d</b> | A (20) <sup>[b]</sup> | 77             | 98.8 : 1.2                                                       | <b>98</b> | ( <i>R</i> ) |
| 4     | <b>8e</b> | B (23) <sup>[b]</sup> | 87             | 81.2 : 18.8                                                      | 62        | ( <i>R</i> ) |
| 5     | <b>8f</b> | A (7) <sup>[b]</sup>  | 63             | 97.6 : 2.4                                                       | <b>95</b> | ( <i>R</i> ) |
| 6     | <b>8g</b> | A (4) <sup>[b]</sup>  | 92             | 96.5 : 3.5                                                       | <b>93</b> | ( <i>R</i> ) |
| 7     | <b>8h</b> | A (4) <sup>[b]</sup>  | 90             | 98.6 : 1.4                                                       | <b>97</b> | ( <i>R</i> ) |
| 8     | <b>8i</b> | A (3) <sup>[b]</sup>  | 91             | 98.5 : 1.5                                                       | <b>97</b> | ( <i>R</i> ) |
| 9     | <b>8j</b> | A (3) <sup>[b]</sup>  | 90             | 98.2 : 1.8                                                       | <b>96</b> | ( <i>R</i> ) |
| 10    | <b>8k</b> | A (3) <sup>[b]</sup>  | 89             | 96.5 : 3.5                                                       | <b>93</b> | ( <i>R</i> ) |
| 11    | <b>8l</b> | A (7) <sup>[b]</sup>  | 85             | 94.4 : 5.6                                                       | 89        | ( <i>R</i> ) |

<sup>[a]</sup>Conditions: A: Ti(O-*i*Pr)<sub>4</sub> (0.1 eq)/*S*-BINOL (0.2 eq)/H<sub>2</sub>O (0.2 eq)/TBHP (2.0 eq), CH<sub>2</sub>Cl<sub>2</sub>, 5 °C. B: Ti(O-*i*Pr)<sub>4</sub> (0.1 eq)/*S*-BINOL (0.2 eq)/H<sub>2</sub>O (0.2 eq)/TBHP (2.0 eq), CH<sub>2</sub>Cl<sub>2</sub>, RT. <sup>[b]</sup>Reaction time in (h). <sup>[c]</sup>Determined by enantioselective analytical HPLC using a Daicel CHIRALPAK IA column.



**Table S3, entry 1:**

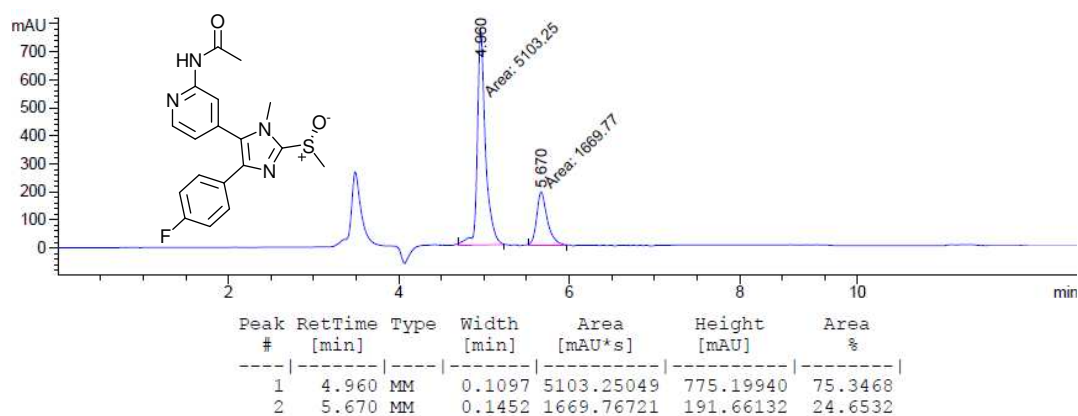

**Table S3, entry 2: (R)-9b**

$[\alpha]_D^{20} = -5.06$  ( $c = 0.474$  in Methanol)

**HPLC:**  $t_R = 2.87$  min, purity: 98.3% ( $\lambda = 254$  nm),  $t_R = 2.87$  min, purity: 98.3% ( $\lambda = 230$  nm).

enantioselective analytical HPLC:

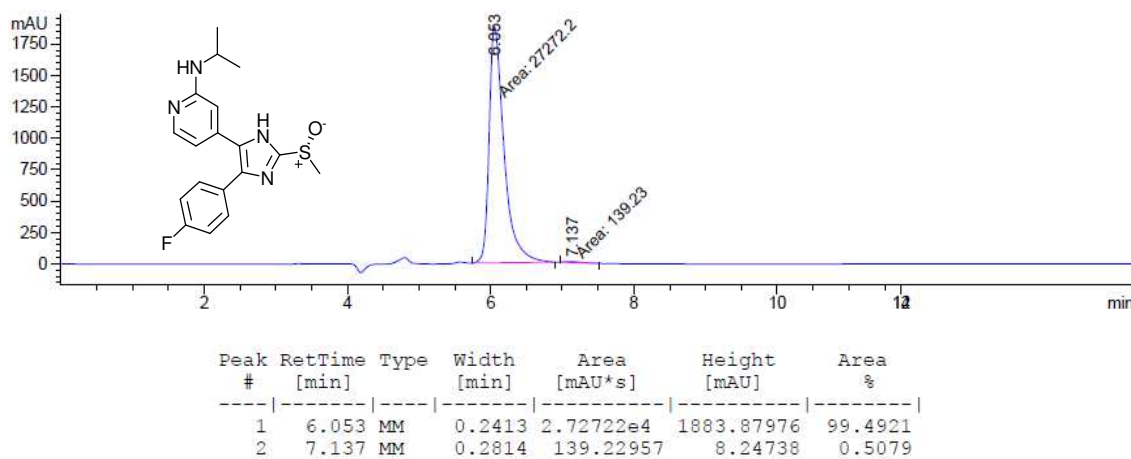

**Table S3, entry 3: (R)-9d**

$[\alpha]_D^{20} = -8.36$  ( $c = 0.528$  in Methanol)

**HPLC:**  $t_R = 2.77$  min, purity: 100.0% ( $\lambda = 254$  nm),  $t_R = 2.77$  min, purity: 100.0% ( $\lambda = 230$  nm).

enantioselective analytical HPLC:

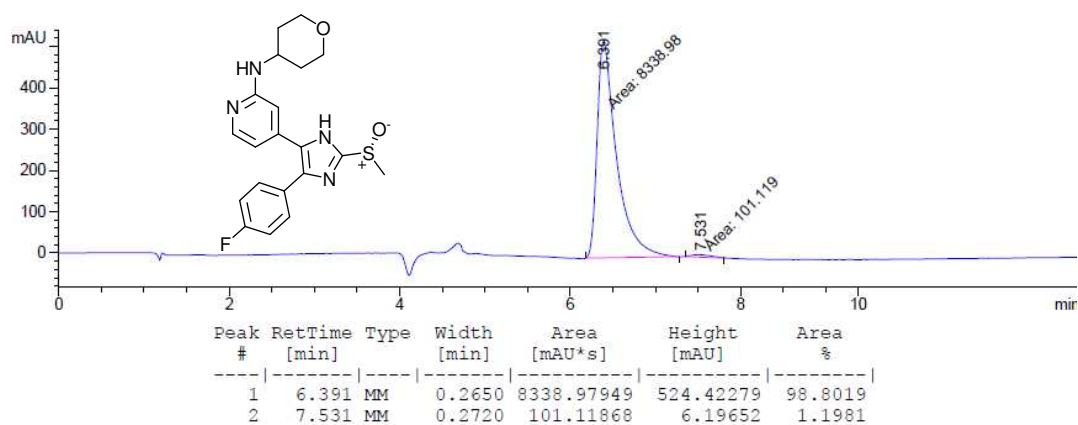

**Table S3, entry 4: (R)-9e**

$[\alpha]_D^{20} = +32.65$  ( $c = 0.269$  in Methanol)

**HPLC:**  $t_R = 4.36$  min, purity: 99.4% ( $\lambda = 254$  nm),  $t_R = 4.36$  min, purity: 99.6% ( $\lambda = 230$  nm)

enantioselective analytical HPLC:

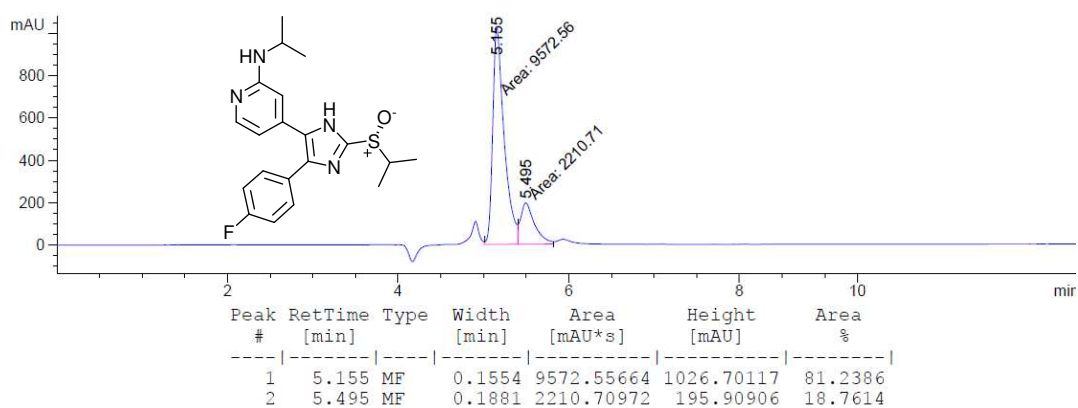

**Table S3, entry 5: (R)-9f**

$[\alpha]_D^{20} = -3.25$  ( $c = 0.529$  in Methanol)

**HPLC:**  $t_R = 6.94$  min, purity: 98.3% ( $\lambda = 254$  nm),  $t_R = 6.94$  min, purity: 96.8% ( $\lambda = 230$  nm)

enantioselective analytical HPLC:

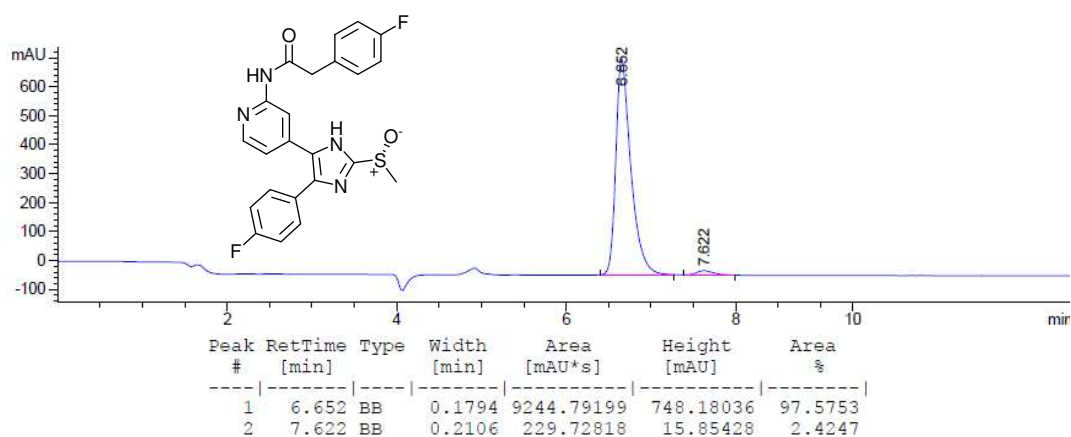

**Table S3, entry 6: (R)-9g**

$[\alpha]_D^{20} = +46.46$  ( $c = 0.419$  in Methanol)

**HPLC:**  $t_R = 5.30$  min, purity: 96.3% ( $\lambda = 254$  nm),  $t_R = 5.30$  min, purity: 96.4% ( $\lambda = 230$  nm)

enantioselective analytical HPLC:

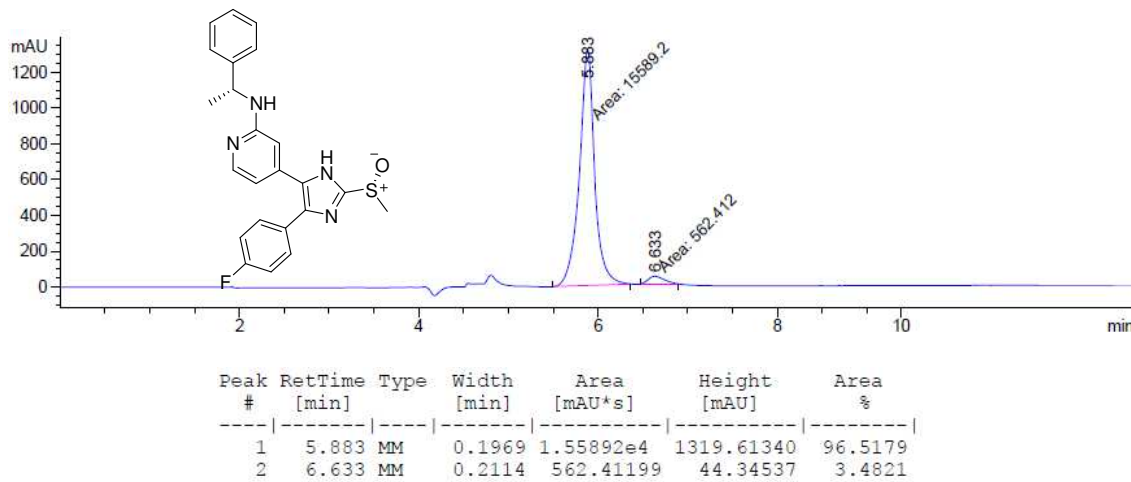

**Table S3, entry 7: (R)-9h**

$[\alpha]_D^{20} = -59.09$  ( $c = 1.012$  in Methanol)

**HPLC:**  $t_R = 4.72$  min, purity: 96.2% ( $\lambda = 254$  nm),  $t_R = 4.72$  min, purity: 98.8% ( $\lambda = 230$  nm)

enantioselective analytical HPLC:

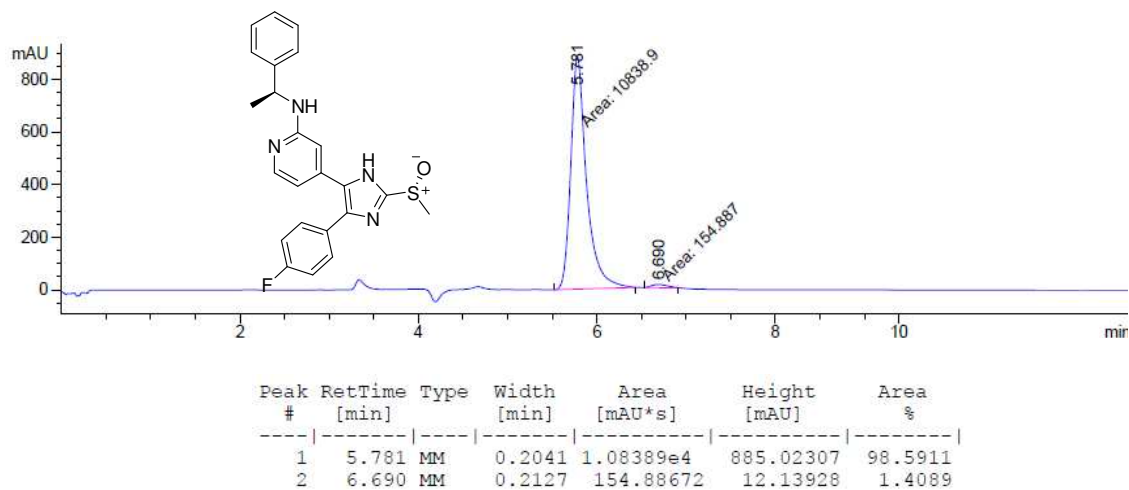

**Table S3, entry 8: (R)-9i**

$[\alpha]_D^{20} = -8.30$  ( $c = 1.024$  in Methanol).

**HPLC:**  $t_R = 4.81$  min, purity: 98.3% ( $\lambda = 254$  nm),  $t_R = 4.81$  min, purity: 98.1% ( $\lambda = 230$  nm)

enantioselective analytical HPLC:

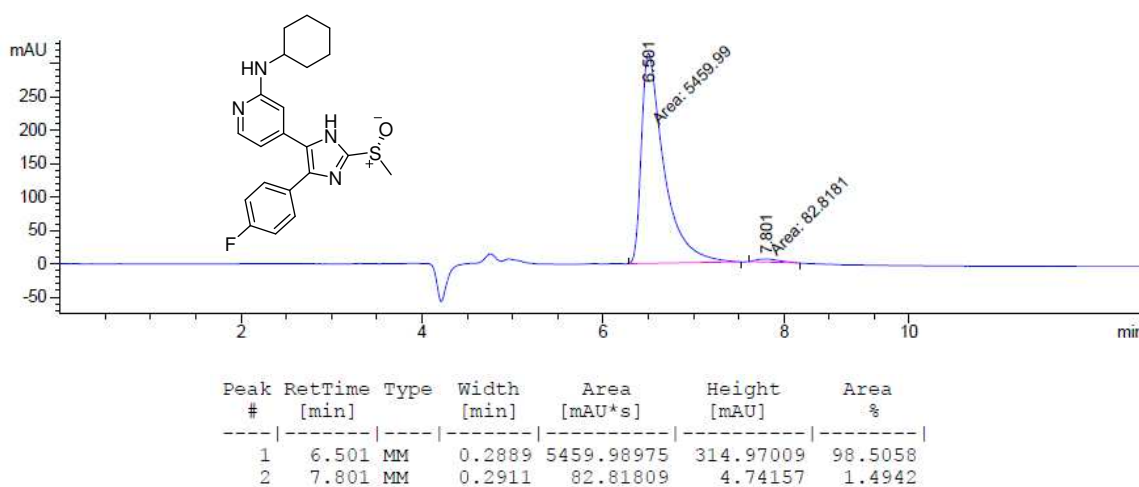

**Table S3, entry 9: (R)-9j**

$[\alpha]_D^{20} = +31.17$  ( $c = 0.515$  in Methanol)

**HPLC:**  $t_R = 4.75$  min, purity: 98.2% ( $\lambda = 254$  nm),  $t_R = 4.75$  min, purity: 98.2% ( $\lambda = 230$  nm)

enantioselective analytical HPLC:

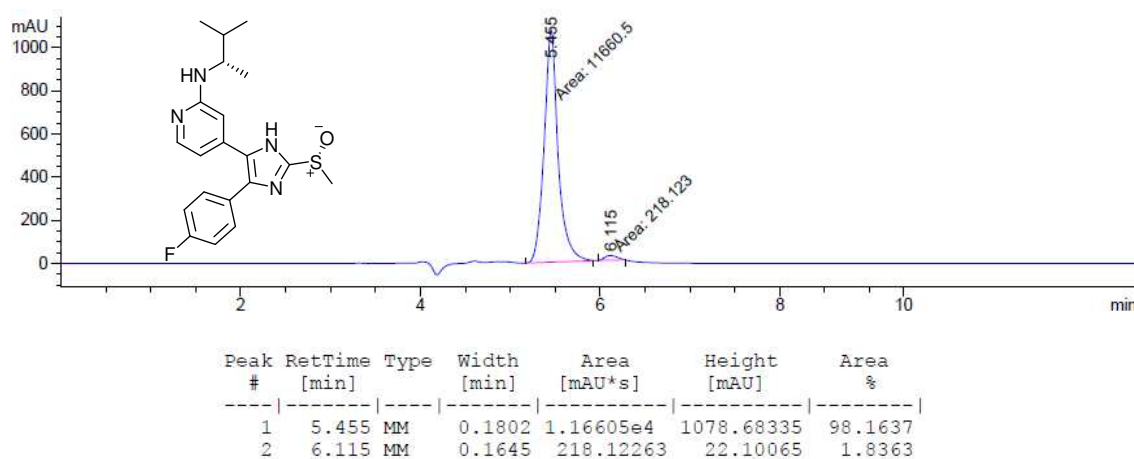

**Table S3, entry 10: (R)-9k**

$[\alpha]_D^{20} = -24.35$  ( $c = 0.232$  in Methanol)

**HPLC:**  $t_R = 4.74$  min, purity: 96.8% ( $\lambda = 254$  nm),  $t_R = 4.74$  min, purity: 96.4% ( $\lambda = 230$  nm).

enantioselective analytical HPLC:

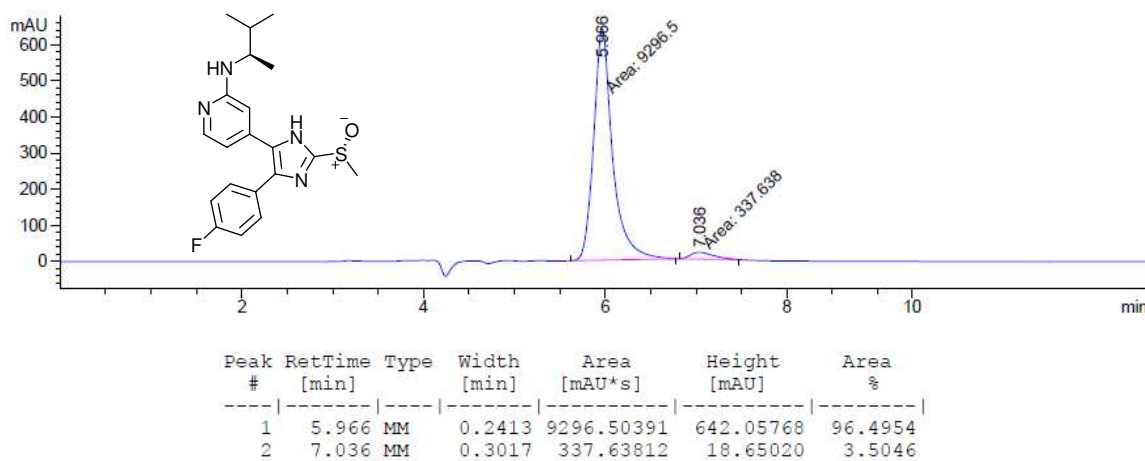

**Table S3, entry 11: (R)-9l**

$[\alpha]_D^{20} = -7.00$  ( $c = 0.533$  in Methanol)

**HPLC:**  $t_R = 4.30$  min, purity: 97.9% ( $\lambda = 254$  nm),  $t_R = 4.30$  min, purity: 98.1% ( $\lambda = 230$  nm)

enantioselective analytical HPLC:

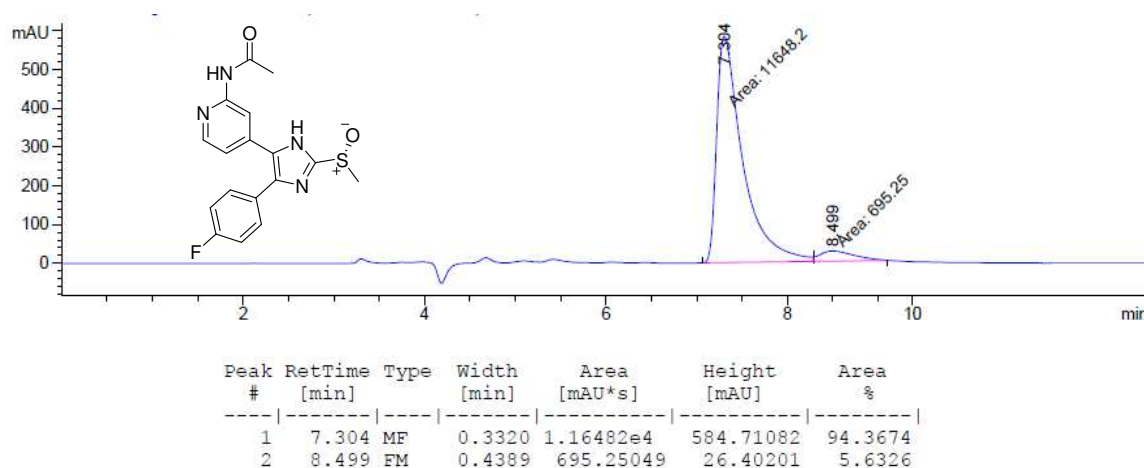

## 7. Asymmetric Oxidation of Tri- and Tetrasubstituted 2-Thioimidazoles with $\text{Ti}(\text{O-}i\text{Pr})_4$ , (*R*)-BINOL and TBHP.

**General Procedure F:**  $\text{Ti}(\text{O-}i\text{Pr})_4$  (0.1 eq.) was added dropwise to a solution of (*R*)-BINOL (0.2 eq.) in 6.0 mL dichloromethane. After stirring for 20 min at room temperature, water (0.2 eq.) and the specific 2-thioimidazole **8a-b**, **8d-l** (1.0 eq.) were added. The resulting mixture was stirred initially at room temperature for 30 min and was then cooled to  $T = 5\text{ }^\circ\text{C}$  (or room temperature for compound **8e**) for 20 min, followed by the dropwise addition of TBHP (70 % in water, 2.0 eq.). The progress of the reaction was monitored until HPLC analysis indicated complete conversion. After reaction completion, the reaction mixture was allowed to warm to room temperature and was stirred for another 45 min before being diluted with  $\text{CH}_2\text{Cl}_2$  and dried over  $\text{Na}_2\text{SO}_4$ . After filtration and evaporation of the solvent, the crude product was purified by flash chromatography on silica gel to yield the pure sulfoxide. The enantiomer ratio of the sulfoxides **9a-b**, **9d-l** was determined by enantioselective, analytical HPLC (Daicel CHIRALPAK IA, 4.6 x 250 mm, 5  $\mu\text{m}$ , 0.8 mL/min,  $\text{CH}_2\text{Cl}_2/\text{MeOH}/\text{TEA}$  98: 2: 0.1,  $\lambda = 254\text{ nm}$ , 0.8 mL/min flow rate).

**Table S4.** Asymmetric Oxidation of the 2-Thioimidazoles with the System Ti(O-*i*Pr)<sub>4</sub>/*R*-BINOL/H<sub>2</sub>O/TBHP.

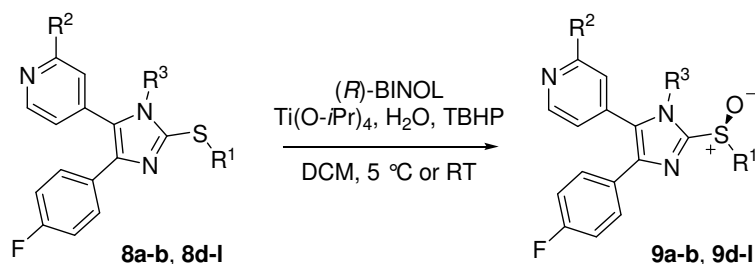

| Entry | Sulfide   | Cond. <sup>[a]</sup>  | Conversion [%] | Enantio ratio E <sub>1</sub> : E <sub>2</sub> [%] <sup>[c]</sup> | <i>ee</i> [%] | Config.      |
|-------|-----------|-----------------------|----------------|------------------------------------------------------------------|---------------|--------------|
| 1     | <b>8a</b> | A (20) <sup>[b]</sup> | 48             | 36.9 : 63.1                                                      | 26            | ( <i>S</i> ) |
| 2     | <b>8b</b> | A (4) <sup>[b]</sup>  | 95             | 0.9 : 99.1                                                       | <b>98</b>     | ( <i>S</i> ) |
| 3     | <b>8d</b> | A (18) <sup>[b]</sup> | 80             | 2.4 : 97.6                                                       | <b>95</b>     | ( <i>S</i> ) |
| 4     | <b>8e</b> | B (24) <sup>[b]</sup> | 63             | 21.2 : 78.8                                                      | 58            | ( <i>S</i> ) |
| 5     | <b>8f</b> | A (6) <sup>[b]</sup>  | 72             | 1.5 : 98.5                                                       | <b>97</b>     | ( <i>S</i> ) |
| 6     | <b>8g</b> | A (6) <sup>[b]</sup>  | 88             | 3.4 : 96.6                                                       | <b>93</b>     | ( <i>S</i> ) |
| 7     | <b>8h</b> | A (4) <sup>[b]</sup>  | 87             | 0.4 : 99.6                                                       | <b>99</b>     | ( <i>S</i> ) |
| 8     | <b>8i</b> | A (3) <sup>[b]</sup>  | 90             | 1.1 : 98.9                                                       | <b>98</b>     | ( <i>S</i> ) |
| 9     | <b>8j</b> | A (3) <sup>[b]</sup>  | 91             | 3.6 : 96.4                                                       | <b>93</b>     | ( <i>S</i> ) |
| 10    | <b>8k</b> | A (4) <sup>[b]</sup>  | 87             | 3.2 : 96.8                                                       | <b>94</b>     | ( <i>S</i> ) |
| 11    | <b>8l</b> | A (7) <sup>[b]</sup>  | 74             | 6.5 : 93.5                                                       | 87            | ( <i>S</i> ) |

<sup>[a]</sup>Conditions: A: Ti(O-*i*Pr)<sub>4</sub> (0.1 eq)/*R*-BINOL (0.2 eq)/H<sub>2</sub>O (0.2 eq)/TBHP (2.0 eq), CH<sub>2</sub>Cl<sub>2</sub>, 5 °C. B: Ti(O-*i*Pr)<sub>4</sub> (0.1 eq)/*R*-BINOL (0.2 eq)/H<sub>2</sub>O (0.2 eq)/TBHP (2.0 eq), CH<sub>2</sub>Cl<sub>2</sub>, RT. <sup>[b]</sup>Reaction time in (h). <sup>[c]</sup>Determined by enantioselective analytical HPLC using a Daicel CHIRALPAK IA column.

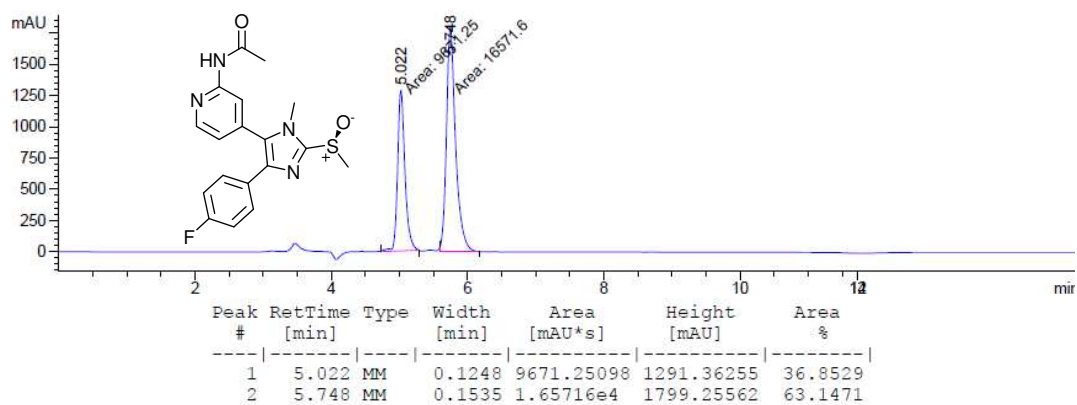

**Table S4, entry 2: (S)-9b**

$[\alpha]_D^{20} = +14.89$  ( $c = 0.470$  in Methanol)

**HPLC:**  $t_R = 2.90$  min, purity: 97.8% ( $\lambda = 254$  nm),  $t_R = 2.90$  min, purity: 97.0% ( $\lambda = 230$  nm).

enantioselective analytical HPLC:

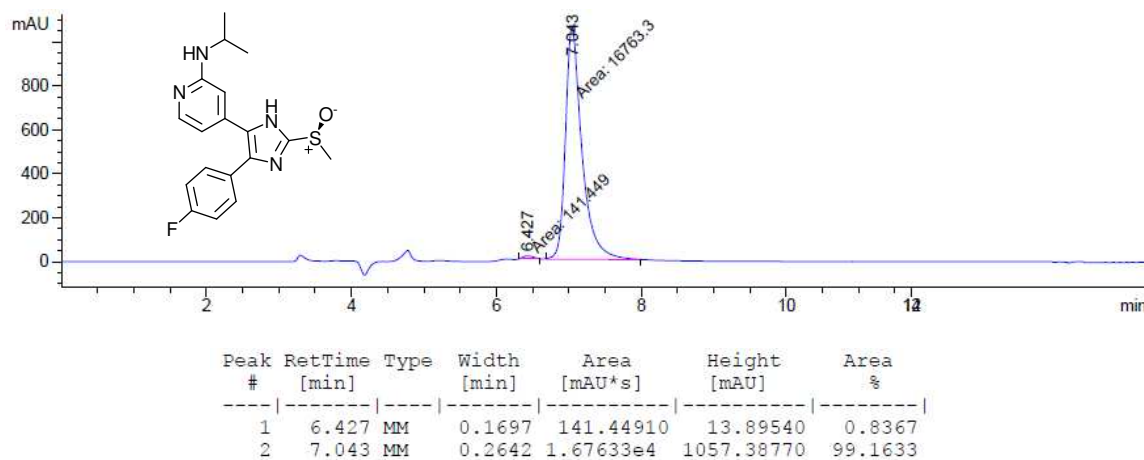

**Table S4, entry 3: (S)-9d**

$[\alpha]_D^{20} = +5.32$  ( $c = 0.533$  in Methanol)

**HPLC:**  $t_R = 2.77$  min, purity: 98.3% ( $\lambda = 254$  nm),  $t_R = 2.77$  min, purity: 97.5% ( $\lambda = 230$  nm).

enantioselective analytical HPLC:

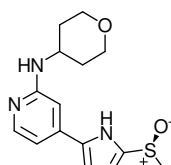



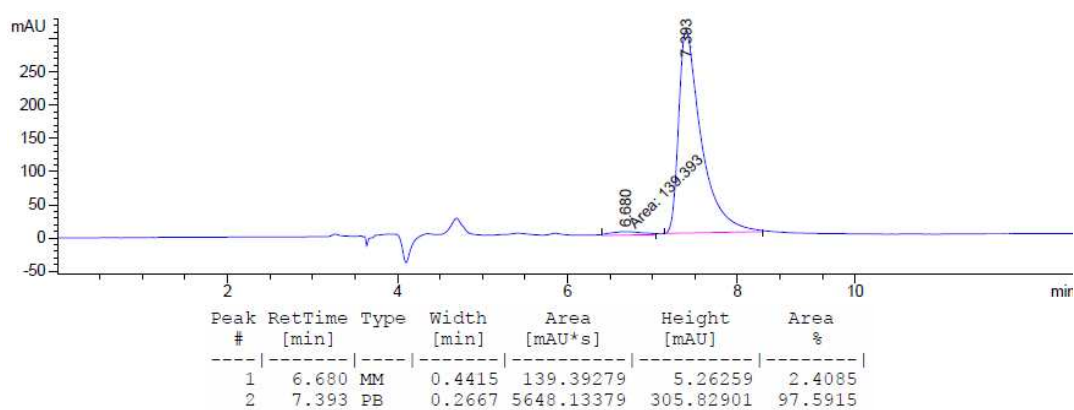

**Table S4, entry 4: (S)-9e**

$[\alpha]_D^{20} = -29.60$  ( $c = 0.272$  in Methanol)

**HPLC:**  $t_R = 4.34$  min, purity: 98.6% ( $\lambda = 254$  nm),  $t_R = 4.34$  min, purity: 98.2% ( $\lambda = 230$  nm)

enantioselective analytical HPLC:

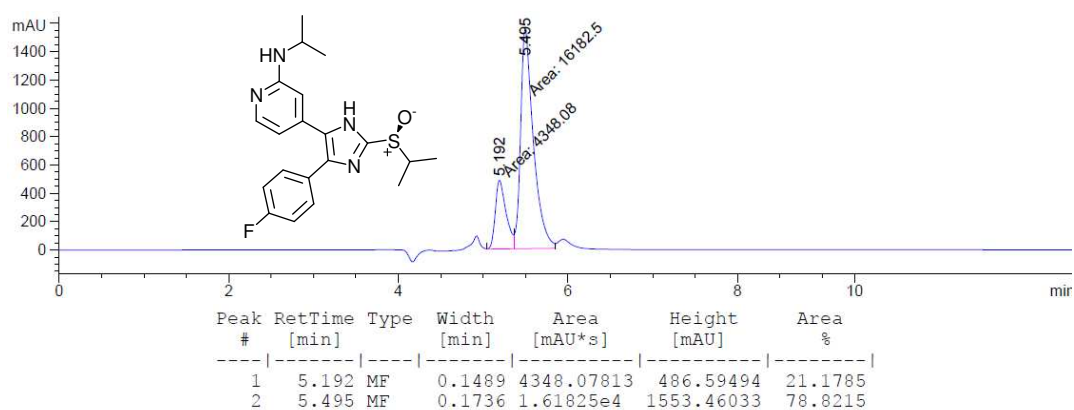

**Table S4, entry 5: (S)-9f**

$[\alpha]_D^{20} = +3.42$  ( $c = 0.546$  in Methanol)

**HPLC:**  $t_R = 6.94$  min, purity: 97.8% ( $\lambda = 254$  nm),  $t_R = 6.94$  min, purity: 96.7% ( $\lambda = 230$  nm)

enantioselective analytical HPLC:



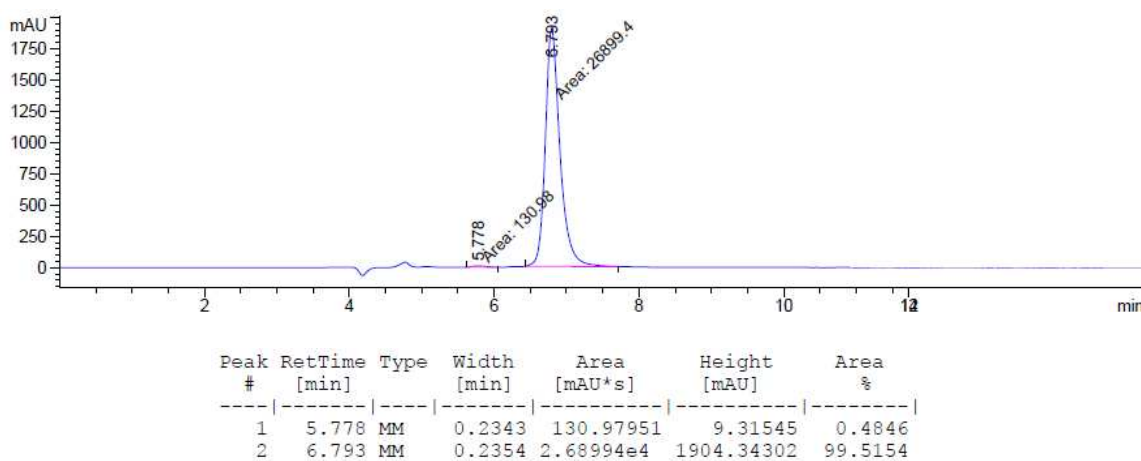

**Table S4, entry 8: (S)-9i:**

$[\alpha]_D^{20} = +9.46$  ( $c = 1.036$  in Methanol)

**HPLC:**  $t_R = 4.75$  min, purity: 97.8% ( $\lambda = 254$  nm),  $t_R = 4.75$  min, purity: 98.4% ( $\lambda = 230$  nm)

enantioselective analytical HPLC:

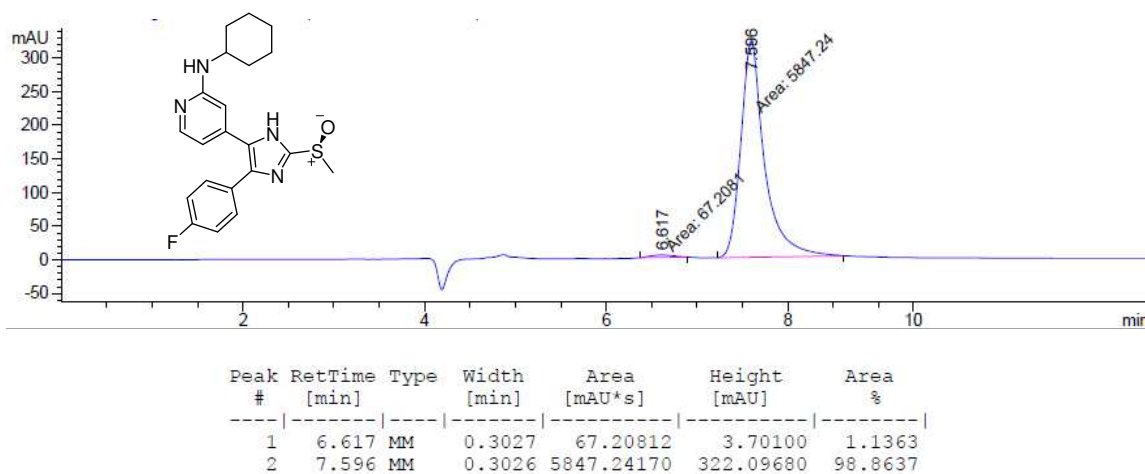

**Table S4, entry 9: (S)-9j**

$[\alpha]_D^{20} = +26.99$  ( $c = 0.531$  in Methanol)

**HPLC:**  $t_R = 4.71$  min, purity: 99.3% ( $\lambda = 254$  nm),  $t_R = 4.70$  min, purity: 99.2% ( $\lambda = 230$  nm)

enantioselective analytical HPLC:

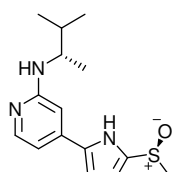

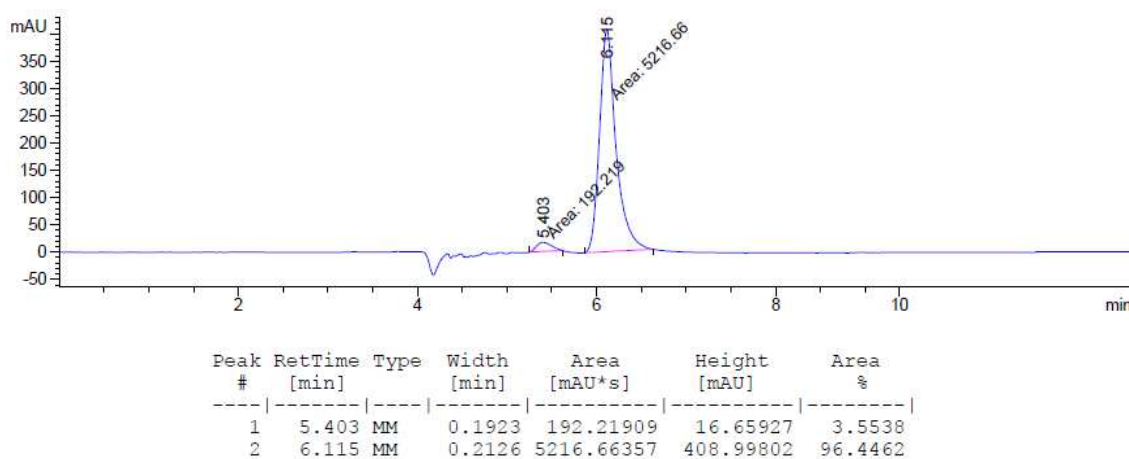

**Table S4, entry 10: (S)-9k**

$[\alpha]_D^{20} = -16.18$  ( $c = 0.238$  in Methanol)

**HPLC:**  $t_R = 3.97$  min, purity: 96.9% ( $\lambda = 254$  nm),  $t_R = 3.97$  min, purity: 96.7% ( $\lambda = 230$  nm)

enantioselective analytical HPLC:

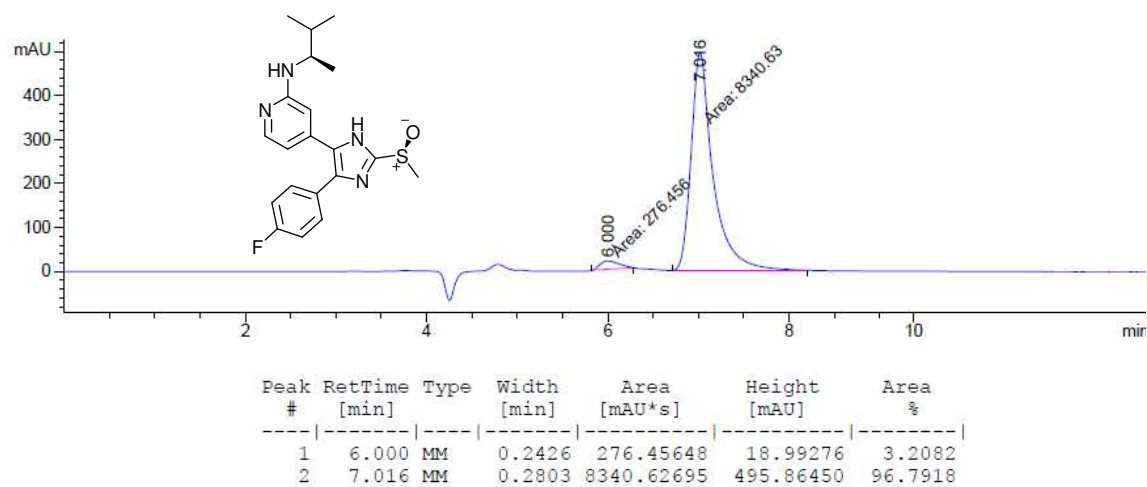

**Table S4, entry 11: (S)-9l**

$[\alpha]_D^{20} = +2.83$  ( $c = 0.519$  in Methanol)

**HPLC:**  $t_R = 4.30$  min, purity: 98.6% ( $\lambda = 254$  nm),  $t_R = 4.30$  min, purity: 97.0% ( $\lambda = 230$  nm)

enantioselective analytical HPLC:

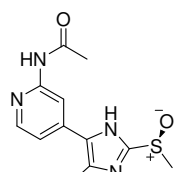

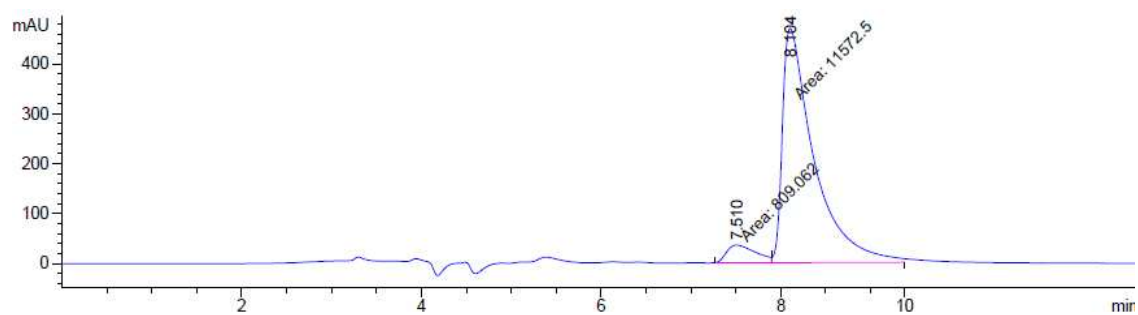

| Peak # | RetTime [min] | Type | Width [min] | Area [mAU*s] | Height [mAU] | Area %  |
|--------|---------------|------|-------------|--------------|--------------|---------|
| 1      | 7.510         | MF   | 0.3792      | 809.06177    | 35.56417     | 6.5344  |
| 2      | 8.104         | FM   | 0.4105      | 1.15725e4    | 469.81064    | 93.4656 |

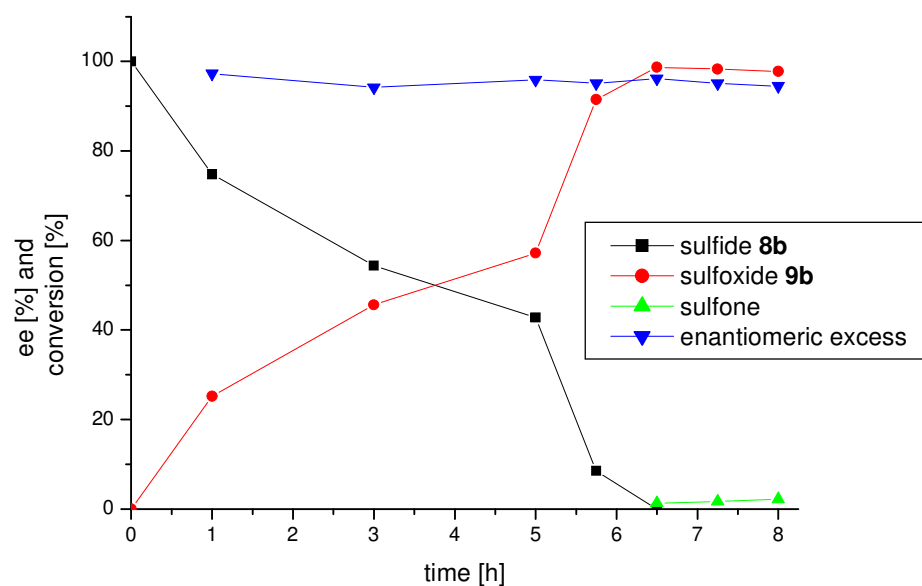

**Figure S3.** Time profile of the enantioselectivity (%ee of sulfoxide **9b**) and conversions (%) in the oxidation of the sulfide **8b** using the catalyst system  $\text{Ti}(\text{O-}i\text{Pr})_4$  (0.1 eq)/*S*-BINOL (0.2 eq)/ $\text{H}_2\text{O}$  (0.2 eq)/TBHP (2.0 eq.).

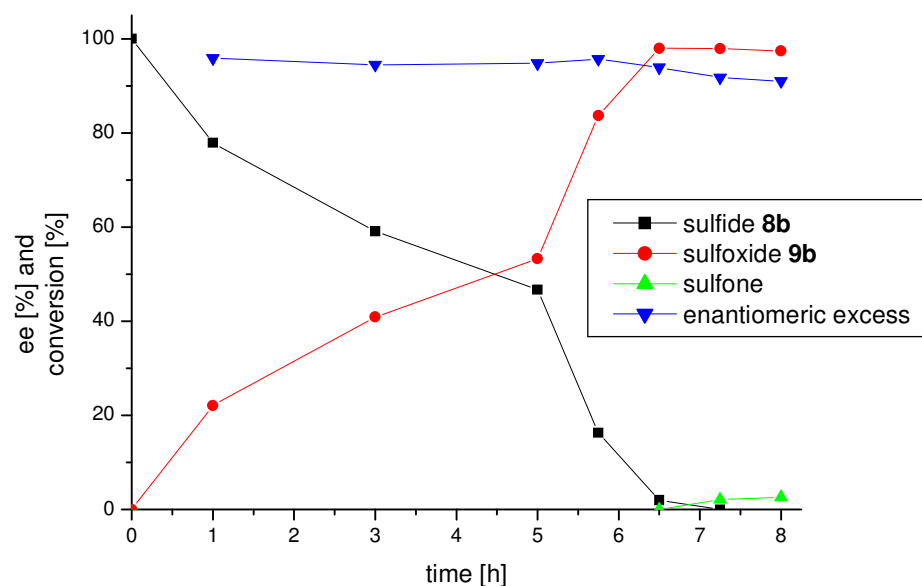

**Figure S4.** Time profile of the enantioselectivity (%ee of sulfoxide **9b**) and conversions (%) in the oxidation of the sulfide **8b** using the catalyst system  $\text{Ti}(\text{O-}i\text{Pr})_4$  (0.1 eq)/*R*-BINOL (0.2 eq)/ $\text{H}_2\text{O}$  (0.2 eq)/TBHP (2.0 eq.).

## 8. X-ray Data of Compound E<sub>1</sub> of **9b** (CCDC 779553)

A)

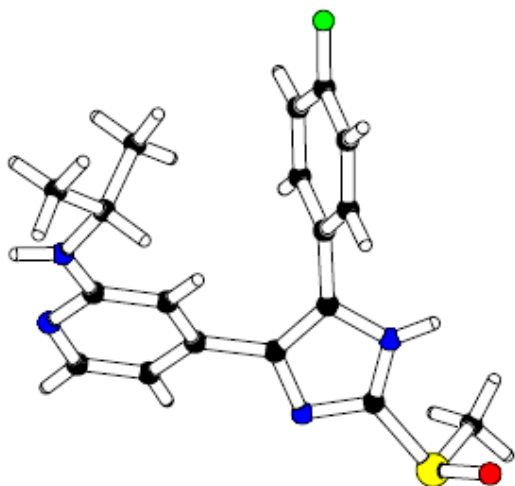

B)

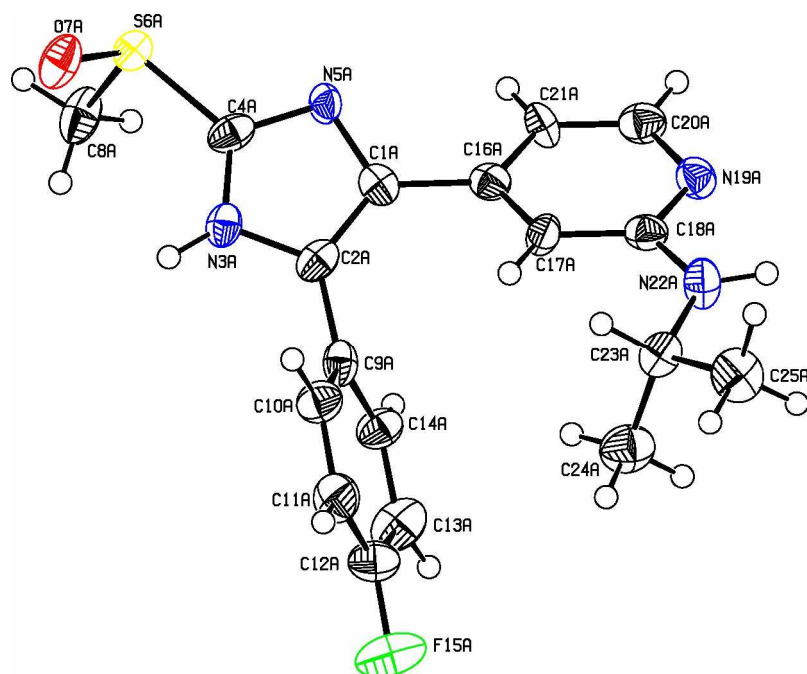

**Figure S5.** A) X-ray crystal structure of the first eluted enantiomer E<sub>1</sub> of the sulfoxide **9b** with (*R*)-configuration. B) Thermal ellipsoid plot of the enantiomer E<sub>1</sub> of the sulfoxide **9b** (CCDC779553).

| E <sub>1</sub> of <b>9b</b> (CCDC 779553)           |                                                                        |
|-----------------------------------------------------|------------------------------------------------------------------------|
| Sum formula                                         | 4(C <sub>18</sub> H <sub>19</sub> FN <sub>4</sub> OS)*H <sub>2</sub> O |
| M <sub>r</sub> [g/mol]                              | 1451.74                                                                |
| Crystal size [mm]                                   | a = 0.40<br>b = 0.30<br>c = 0.10<br>Plate, colourless                  |
| Space group                                         | C2                                                                     |
| Hall group                                          | C2y                                                                    |
| Cell setting                                        | monoclinic                                                             |
| Cell length [Å]                                     | a = 23.844(7)<br>b = 17.635(2)<br>c = 17.230(5)                        |
| Cell angle [°]                                      | α = 90.0<br>β = 101.498(14)<br>γ = 90.0                                |
| Cell volume [Å <sup>3</sup> ]                       | V = 7100(3)                                                            |
| Cell formula units Z                                | 4                                                                      |
| Temperature [K]                                     | 193(2)                                                                 |
| Crystal density D <sub>x</sub> [g/cm <sup>3</sup> ] | 1.358                                                                  |
| Absorpt coefficient μ [mm <sup>-1</sup> ]           | 1.84                                                                   |
| F <sub>000</sub>                                    | 3048                                                                   |
| Measured reflections                                | 13112                                                                  |
| independent reflections                             | 12933                                                                  |
| Reflections with I>2σ(I)                            | 9241                                                                   |
| θ <sub>max</sub> [°]                                | 70.2                                                                   |
| θ <sub>min</sub> [°]                                | 2.6                                                                    |
| R                                                   | 0.107                                                                  |
| wR <sub>2</sub>                                     | 0.310                                                                  |
| S                                                   | 1.11                                                                   |
| Npar                                                | 910                                                                    |



## 9. X-ray Data of Compound E<sub>2</sub> of 9b (CCDC 779554)

A)

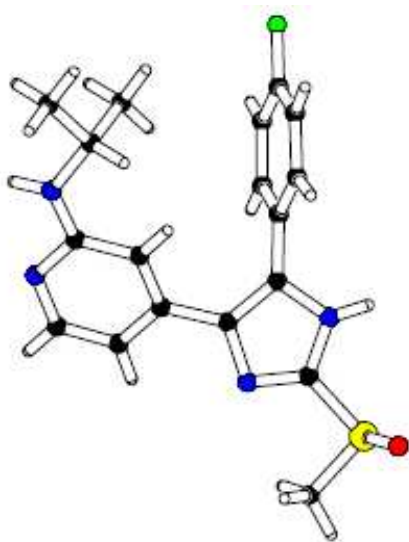

B)

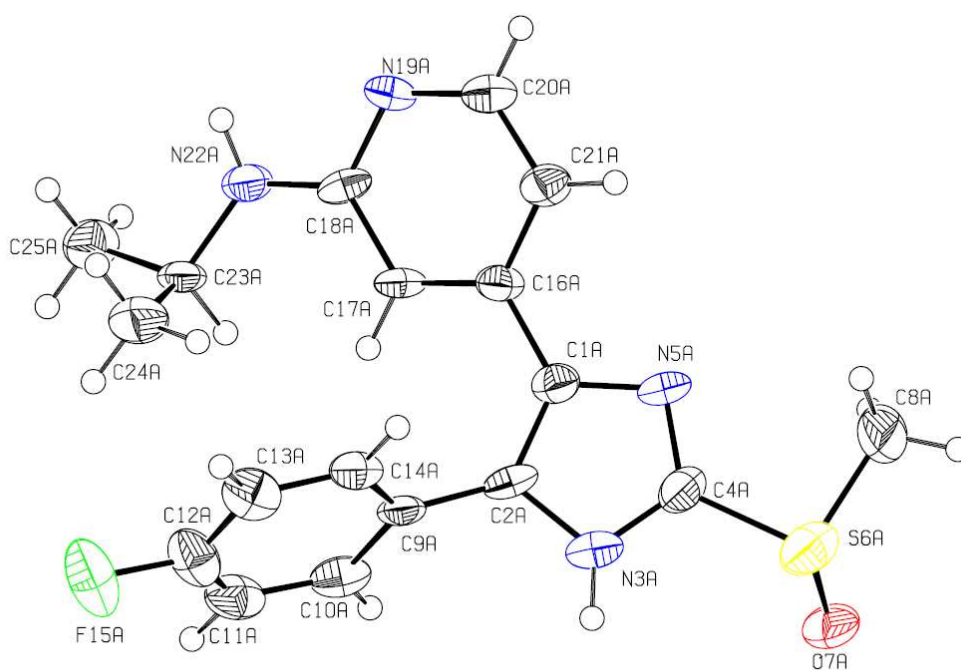

**Figure S6.** A) X-ray crystal structure of the second eluted enantiomer E<sub>2</sub> of the sulfoxide **9b** with (*S*)-configuration. B) Thermal ellipsoid plot of the enantiomer E<sub>2</sub> of the sulfoxide **9b** (CCDC779554).

| E <sub>2</sub> of <b>9b</b> (CCDC 779554)           |                                                                        |
|-----------------------------------------------------|------------------------------------------------------------------------|
| Sum formula                                         | 4(C <sub>18</sub> H <sub>19</sub> FN <sub>4</sub> OS)*H <sub>2</sub> O |
| M <sub>r</sub> [g/mol]                              | 1451.74                                                                |
| Crystal size [mm]                                   | a = 0.36<br>b = 0.24<br>c = 0.03<br>Plate, colourless                  |
| Space group                                         | C2                                                                     |
| Hall group                                          | C2y                                                                    |
| Cell setting                                        | monoclinic                                                             |
| Cell length [Å]                                     | a = 23.8564(11)<br>b = 17.6833(8)<br>c = 17.2479(8)                    |
| Cell angle [°]                                      | α = 90.0<br>β = 101.489(3)<br>γ = 90.0                                 |
| Cell volume [Å <sup>3</sup> ]                       | V = 7130.4(6)                                                          |
| Cell formula units Z                                | 4                                                                      |
| Temperature [K]                                     | 173(2)                                                                 |
| Crystal density D <sub>x</sub> [g/cm <sup>3</sup> ] | 1.352                                                                  |
| Absorpt coefficient μ [mm <sup>-1</sup> ]           | 0.21                                                                   |
| F <sub>000</sub>                                    | 3048                                                                   |
| Measured reflections                                | 39716                                                                  |
| independent reflections                             | 16006                                                                  |
| Reflections with I>2σ(I)                            | 6570                                                                   |
| θ <sub>max</sub> [°]                                | 28.0                                                                   |
| θ <sub>min</sub> [°]                                | 1.2                                                                    |
| R                                                   | 0.069                                                                  |
| wR <sub>2</sub>                                     | 0.171                                                                  |
| S                                                   | 0.95                                                                   |
| Npar                                                | 922                                                                    |
